# Supplementary material for: Data-Mining Approach on Transcriptomics and Methylomics Placental Analysis Highlights Genes in Fetal Growth Restriction
Source: Front Genet. 2020 Jan 9;10:1292. doi: 10.3389/fgene.2019.01292 (PMC6962302; doi:10.3389/fgene.2019.01292)
Supplement: Supplementary file 2 [file Table_2.xlsx]

## Sheet: Gene expression
Annotation Cluster 1	Enrichment Score: 1.5561903424239447
Category	Term	Count	%	PValue	Genes	List Total	Pop Hits	Pop Total	Fold Enrichment	Bonferroni	Benjamini	FDR
GOTERM_MF_DIRECT	GO:0051287~NAD binding	6	1.44928	0.00125261	NDUFV1, AOX1, HSD11B2, AHCYL1, AHCYL2, HIBADH	364	38	16881	7.32259	0.544852	0.23078	1.84548
UP_KEYWORDS	NAD	8	1.93237	0.0547326	NDUFV1, HSD11B2, ALDH4A1, SIRT5, AHCYL1, AHCYL2, HIBADH, NSDHL	400	175	20581	2.35211	1	0.586331	53.6146
INTERPRO	IPR016040:NAD(P)-binding domain	6	1.44928	0.312872	HSD11B2, AHCYL1, AHCYL2, HIBADH, NSDHL, CRYZL1	385	179	18559	1.61582	1	0.999965	99.6982
Annotation Cluster 2	Enrichment Score: 1.4916501940397655
Category	Term	Count	%	PValue	Genes	List Total	Pop Hits	Pop Total	Fold Enrichment	Bonferroni	Benjamini	FDR
GOTERM_CC_DIRECT	GO:0035267~NuA4 histone acetyltransferase complex	4	0.966184	0.00577331	ACTB, MORF4L2, EP400, BRD8	380	18	18224	10.6573	0.892382	0.35971	7.71703
GOTERM_BP_DIRECT	GO:0043968~histone H2A acetylation	3	0.724638	0.0404408	MORF4L2, EP400, BRD8	363	15	16792	9.25179	1	0.981987	50.7119
GOTERM_BP_DIRECT	GO:0043967~histone H4 acetylation	3	0.724638	0.143484	MORF4L2, EP400, BRD8	363	31	16792	4.47667	1	0.997869	92.966
Annotation Cluster 3	Enrichment Score: 1.4412081835508168
Category	Term	Count	%	PValue	Genes	List Total	Pop Hits	Pop Total	Fold Enrichment	Bonferroni	Benjamini	FDR
BIOCARTA	h_eif4Pathway:Regulation of eIF4e and p70 S6 Kinase	4	0.966184	0.02675	EIF4G1, EIF4G2, MKNK1, PIK3R1	46	24	1625	5.88768	0.958096	0.958096	26.6426
BIOCARTA	h_mtorPathway:mTOR Signaling Pathway	4	0.966184	0.0330668	EIF4G1, EIF4G2, MKNK1, PIK3R1	46	26	1625	5.43478	0.980439	0.86014	31.9027
UP_KEYWORDS	Translation regulation	6	1.44928	0.0536611	EIF4G1, EIF4G2, EIF4EBP2, MKNK1, EPRS, TNRC6B	400	105	20581	2.94014	1	0.595907	52.8918
Annotation Cluster 4	Enrichment Score: 1.4147781197199731
Category	Term	Count	%	PValue	Genes	List Total	Pop Hits	Pop Total	Fold Enrichment	Bonferroni	Benjamini	FDR
KEGG_PATHWAY	hsa04142:Lysosome	8	1.93237	0.0199389	SLC11A2, LAMP1, ABCB9, HEXB, GAA, AP3S1, PPT1, GBA	158	121	6910	2.89152	0.990069	0.684322	22.7426
GOTERM_CC_DIRECT	GO:0005764~lysosome	11	2.657	0.0203301	SLC11A2, LAMP1, ABCB9, HPSE, TMEM59, USP5, GAA, MPO, PPT1, ARRDC3, DEPDC5	380	226	18224	2.33423	0.999632	0.627854	24.7906
GOTERM_CC_DIRECT	GO:0005765~lysosomal membrane	12	2.89855	0.0287783	SLC11A2, LAMP1, DAB2, ABCB9, HPSE, RAB5C, TMEM59, SLC12A4, GAA, ANXA2, GBA, DEPDC5	380	274	18224	2.10035	0.999987	0.640132	33.304
UP_KEYWORDS	Lysosome	10	2.41546	0.0715443	LAMP1, ABCB9, HPSE, TMEM59, HEXB, GAA, MPO, PPT1, ARRDC3, GBA	400	263	20581	1.95637	1	0.586506	63.6905
GOTERM_CC_DIRECT	GO:0043202~lysosomal lumen	5	1.20773	0.101072	HPSE, HEXB, GAA, PPT1, GBA	380	85	18224	2.82105	1	0.781146	77.1889
Annotation Cluster 5	Enrichment Score: 1.3619182393402576
Category	Term	Count	%	PValue	Genes	List Total	Pop Hits	Pop Total	Fold Enrichment	Bonferroni	Benjamini	FDR
UP_SEQ_FEATURE	repeat:HEAT 8	4	0.966184	0.00601139	PPP2R1A, IPO13, TNPO2, TNPO1	401	19	20063	10.5331	0.999563	0.924122	9.36127
UP_SEQ_FEATURE	repeat:HEAT 7	4	0.966184	0.0116674	PPP2R1A, IPO13, TNPO2, TNPO1	401	24	20063	8.33874	1	0.918695	17.4125
UP_SEQ_FEATURE	repeat:HEAT 13	3	0.724638	0.0160503	PPP2R1A, IPO13, TNPO2	401	10	20063	15.0097	1	0.925351	23.1844
UP_SEQ_FEATURE	repeat:HEAT 12	3	0.724638	0.0160503	PPP2R1A, IPO13, TNPO2	401	10	20063	15.0097	1	0.925351	23.1844
UP_SEQ_FEATURE	repeat:HEAT 11	3	0.724638	0.0193611	PPP2R1A, IPO13, TNPO2	401	11	20063	13.6452	1	0.9384	27.2909
UP_SEQ_FEATURE	repeat:HEAT 6	4	0.966184	0.0214412	PPP2R1A, IPO13, TNPO2, TNPO1	401	30	20063	6.67099	1	0.938013	29.7647
UP_SEQ_FEATURE	domain:Importin N-terminal	3	0.724638	0.0308	IPO13, TNPO2, TNPO1	401	14	20063	10.7212	1	0.97398	39.9487
UP_SEQ_FEATURE	repeat:HEAT 5	4	0.966184	0.0321457	PPP2R1A, IPO13, TNPO2, TNPO1	401	35	20063	5.71799	1	0.969602	41.2936
UP_SEQ_FEATURE	repeat:HEAT 9	3	0.724638	0.0350778	PPP2R1A, IPO13, TNPO2	401	15	20063	10.0065	1	0.970521	44.1265
UP_SEQ_FEATURE	repeat:HEAT 10	3	0.724638	0.0350778	PPP2R1A, IPO13, TNPO2	401	15	20063	10.0065	1	0.970521	44.1265
SMART	SM00913:SM00913	3	0.724638	0.0425991	IPO13, TNPO2, TNPO1	210	16	10057	8.97946	0.999733	0.872155	41.7592
INTERPRO	IPR001494:Importin-beta, N-terminal	3	0.724638	0.0473212	IPO13, TNPO2, TNPO1	385	17	18559	8.5068	1	0.994098	52.7497
UP_SEQ_FEATURE	repeat:HEAT 4	4	0.966184	0.0540149	PPP2R1A, IPO13, TNPO2, TNPO1	401	43	20063	4.65418	1	0.984865	59.5531
GOTERM_MF_DIRECT	GO:0008565~protein transporter activity	5	1.20773	0.0693507	AP2A1, IPO13, AP3S1, TNPO2, TNPO1	364	72	16881	3.22058	1	0.960205	65.635
UP_SEQ_FEATURE	repeat:HEAT 3	4	0.966184	0.0776254	PPP2R1A, IPO13, TNPO2, TNPO1	401	50	20063	4.00259	1	0.994392	73.2116
INTERPRO	IPR011989:Armadillo-like helical	9	2.17391	0.0965494	JUP, PPP2R1A, SYMPK, AP2A1, IPO13, CUL9, HEATR1, TNPO2, TNPO1	385	225	18559	1.92821	1	0.997851	79.2004
UP_SEQ_FEATURE	repeat:HEAT 2	4	0.966184	0.109122	PPP2R1A, IPO13, TNPO2, TNPO1	401	58	20063	3.45051	1	0.997341	84.7953
UP_SEQ_FEATURE	repeat:HEAT 1	4	0.966184	0.109122	PPP2R1A, IPO13, TNPO2, TNPO1	401	58	20063	3.45051	1	0.997341	84.7953
GOTERM_MF_DIRECT	GO:0008139~nuclear localization sequence binding	3	0.724638	0.121022	IPO13, TNPO2, TNPO1	364	28	16881	4.9689	1	0.991479	85.2961
GOTERM_MF_DIRECT	GO:0008536~Ran GTPase binding	3	0.724638	0.135518	IPO13, TNPO2, TNPO1	364	30	16881	4.63764	1	0.989669	88.5158
GOTERM_BP_DIRECT	GO:0006886~intracellular protein transport	8	1.93237	0.248555	AP2A1, IPO13, TIMM17B, AP3S1, TNPO2, PDCD6, TNPO1, TBC1D9B	363	236	16792	1.5681	1	0.998957	99.2534
Annotation Cluster 6	Enrichment Score: 1.2453504461616924
Category	Term	Count	%	PValue	Genes	List Total	Pop Hits	Pop Total	Fold Enrichment	Bonferroni	Benjamini	FDR
SMART	SM00800:uDENN	3	0.724638	0.0377813	MADD, DENND1A, DENND2A	210	15	10057	9.5781	0.99931	0.911641	38.0134
INTERPRO	IPR001194:DENN domain	3	0.724638	0.0423207	MADD, DENND1A, DENND2A	385	16	18559	9.03847	1	0.994659	48.765
INTERPRO	IPR005112:dDENN domain	3	0.724638	0.0423207	MADD, DENND1A, DENND2A	385	16	18559	9.03847	1	0.994659	48.765
INTERPRO	IPR005113:uDENN domain	3	0.724638	0.0423207	MADD, DENND1A, DENND2A	385	16	18559	9.03847	1	0.994659	48.765
SMART	SM00801:dDENN	3	0.724638	0.0425991	MADD, DENND1A, DENND2A	210	16	10057	8.97946	0.999733	0.872155	41.7592
SMART	SM00799:DENN	3	0.724638	0.0425991	MADD, DENND1A, DENND2A	210	16	10057	8.97946	0.999733	0.872155	41.7592
UP_SEQ_FEATURE	domain:uDENN	3	0.724638	0.0442668	MADD, DENND1A, DENND2A	401	17	20063	8.82925	1	0.9735	52.1961
UP_SEQ_FEATURE	domain:DENN	3	0.724638	0.0442668	MADD, DENND1A, DENND2A	401	17	20063	8.82925	1	0.9735	52.1961
UP_SEQ_FEATURE	domain:dDENN	3	0.724638	0.0442668	MADD, DENND1A, DENND2A	401	17	20063	8.82925	1	0.9735	52.1961
GOTERM_MF_DIRECT	GO:0017112~Rab guanyl-nucleotide exchange factor activity	3	0.724638	0.135518	MADD, DENND1A, DENND2A	364	30	16881	4.63764	1	0.989669	88.5158
UP_KEYWORDS	Guanine-nucleotide releasing factor	5	1.20773	0.327475	RALGPS1, MADD, DENND1A, DENND2A, DOCK8	400	149	20581	1.72659	1	0.803946	99.5547
Annotation Cluster 7	Enrichment Score: 1.2420059912044885
Category	Term	Count	%	PValue	Genes	List Total	Pop Hits	Pop Total	Fold Enrichment	Bonferroni	Benjamini	FDR
UP_KEYWORDS	LIM domain	5	1.20773	0.0511793	LIMS2, LIMCH1, MICAL1, ZYX, LIMS3	400	72	20581	3.57309	1	0.595958	51.1775
UP_SEQ_FEATURE	domain:LIM zinc-binding	3	0.724638	0.0542341	LIMCH1, MICAL1, LIMS3	401	19	20063	7.89986	1	0.981211	59.7056
INTERPRO	IPR001781:Zinc finger, LIM-type	5	1.20773	0.0620289	LIMS2, LIMCH1, MICAL1, ZYX, LIMS3	385	72	18559	3.34758	1	0.997586	62.8545
SMART	SM00132:LIM	5	1.20773	0.0625194	LIMS2, LIMCH1, MICAL1, ZYX, LIMS3	210	72	10057	3.32573	0.999995	0.912869	55.1427
Annotation Cluster 8	Enrichment Score: 1.2229702805383038
Category	Term	Count	%	PValue	Genes	List Total	Pop Hits	Pop Total	Fold Enrichment	Bonferroni	Benjamini	FDR
SMART	SM00324:RhoGAP	6	1.44928	0.0111247	ARHGAP21, ARHGAP17, ARHGAP24, OCRL, PIK3R1, ARHGAP26	210	65	10057	4.42066	0.879288	0.879288	12.9701
UP_SEQ_FEATURE	domain:Rho-GAP	6	1.44928	0.0114709	ARHGAP21, ARHGAP17, ARHGAP24, OCRL, PIK3R1, ARHGAP26	401	68	20063	4.41463	1	0.948203	17.1443
INTERPRO	IPR000198:Rho GTPase-activating protein domain	6	1.44928	0.0125101	ARHGAP21, ARHGAP17, ARHGAP24, OCRL, PIK3R1, ARHGAP26	385	67	18559	4.31688	0.999977	0.999977	17.6911
INTERPRO	IPR008936:Rho GTPase activation protein	6	1.44928	0.0405351	ARHGAP21, ARHGAP17, ARHGAP24, OCRL, PIK3R1, ARHGAP26	385	91	18559	3.17836	1	0.997095	47.2676
GOTERM_BP_DIRECT	GO:0051056~regulation of small GTPase mediated signal transduction	5	1.20773	0.327459	ARHGAP17, ARHGAP24, OCRL, ITSN1, ARHGAP26	363	134	16792	1.72608	1	0.999521	99.8885
UP_KEYWORDS	GTPase activation	6	1.44928	0.335693	ARHGAP21, ARHGAP17, ARHGAP24, ARHGAP26, TBC1D9B, DEPDC5	400	197	20581	1.56708	1	0.806174	99.6235
GOTERM_MF_DIRECT	GO:0005096~GTPase activator activity	8	1.93237	0.386485	PREB, ARHGAP21, ARHGAP17, ARHGAP24, OCRL, ARHGAP26, TBC1D9B, DEPDC5	364	279	16881	1.32979	1	0.996221	99.9297
Annotation Cluster 9	Enrichment Score: 1.2061948965841192
Category	Term	Count	%	PValue	Genes	List Total	Pop Hits	Pop Total	Fold Enrichment	Bonferroni	Benjamini	FDR
INTERPRO	IPR001723:Steroid hormone receptor	5	1.20773	0.0159858	ESRRA, RARG, NR0B1, NR2F2, NR2C1	385	47	18559	5.12821	0.999999	0.989431	22.0592
INTERPRO	IPR000536:Nuclear hormone receptor, ligand-binding, core	5	1.20773	0.017162	ESRRA, RARG, NR0B1, NR2F2, NR2C1	385	48	18559	5.02137	1	0.974411	23.4876
SMART	SM00430:HOLI	5	1.20773	0.0172837	ESRRA, RARG, NR0B1, NR2F2, NR2C1	210	48	10057	4.98859	0.962939	0.807486	19.4669
INTERPRO	IPR013088:Zinc finger, NHR/GATA-type	5	1.20773	0.0319061	ESRRA, RARG, GATAD1, NR2F2, NR2C1	385	58	18559	4.15562	1	0.995885	39.4364
GOTERM_MF_DIRECT	GO:0003707~steroid hormone receptor activity	5	1.20773	0.0321786	ESRRA, RARG, NR0B1, NR2F2, NR2C1	364	56	16881	4.14075	1	0.946835	38.4969
GOTERM_BP_DIRECT	GO:0043401~steroid hormone mediated signaling pathway	5	1.20773	0.0343097	ESRRA, RARG, NR0B1, NR2F2, NR2C1	363	57	16792	4.0578	1	0.981618	45.0272
GOTERM_BP_DIRECT	GO:0030522~intracellular receptor signaling pathway	4	0.966184	0.0481112	ESRRA, NR0B1, NR2F2, BRD8	363	38	16792	4.86936	1	0.984576	57.0459
UP_SEQ_FEATURE	zinc finger region:NR C4-type	4	0.966184	0.0603538	ESRRA, RARG, NR2F2, NR2C1	401	45	20063	4.44733	1	0.985059	63.7518
UP_SEQ_FEATURE	DNA-binding region:Nuclear receptor	4	0.966184	0.0603538	ESRRA, RARG, NR2F2, NR2C1	401	45	20063	4.44733	1	0.985059	63.7518
INTERPRO	IPR001628:Zinc finger, nuclear hormone receptor-type	4	0.966184	0.0694877	ESRRA, RARG, NR2F2, NR2C1	385	46	18559	4.19176	1	0.997757	67.1691
SMART	SM00399:ZnF_C4	4	0.966184	0.070015	ESRRA, RARG, NR2F2, NR2C1	210	46	10057	4.16439	0.999999	0.859119	59.3986
GOTERM_MF_DIRECT	GO:0004879~RNA polymerase II transcription factor activity, ligand-activated sequence-specific DNA binding	3	0.724638	0.180944	ESRRA, NR0B1, NR2F2	364	36	16881	3.8647	1	0.98863	94.851
GOTERM_BP_DIRECT	GO:0006367~transcription initiation from RNA polymerase II promoter	4	0.966184	0.639881	ESRRA, RARG, NR0B1, NR2C1	363	152	16792	1.21734	1	0.999996	100
GOTERM_MF_DIRECT	GO:0043565~sequence-specific DNA binding	10	2.41546	0.787182	ELF1, ESRRA, RARG, BCL2, BCL6, GATAD1, NR0B1, NR2F2, DISC1, NR2C1	364	518	16881	0.895297	1	0.99998	100
Annotation Cluster 10	Enrichment Score: 1.195152984682138
Category	Term	Count	%	PValue	Genes	List Total	Pop Hits	Pop Total	Fold Enrichment	Bonferroni	Benjamini	FDR
UP_SEQ_FEATURE	calcium-binding region:2	8	1.93237	0.00945932	GUCA1B, NUCB1, S100A6, HPCAL1, CETN2, ITSN1, PDCD6, CALM1	401	118	20063	3.39203	0.999995	0.952571	14.3527
UP_SEQ_FEATURE	calcium-binding region:1	8	1.93237	0.0143498	GUCA1B, NUCB1, S100A6, HPCAL1, CETN2, ITSN1, PDCD6, CALM1	401	128	20063	3.12703	1	0.92929	20.9915
UP_SEQ_FEATURE	domain:EF-hand 4	5	1.20773	0.0351181	GUCA1B, HPCAL1, CETN2, PDCD6, CALM1	401	62	20063	4.03487	1	0.962228	44.1645
UP_SEQ_FEATURE	calcium-binding region:3	4	0.966184	0.0423672	GUCA1B, HPCAL1, PDCD6, CALM1	401	39	20063	5.13153	1	0.975346	50.6234
INTERPRO	IPR018247:EF-Hand 1, calcium-binding site	8	1.93237	0.0772885	GUCA1B, NUCB1, S100A6, HPCAL1, CETN2, ITSN1, PDCD6, CALM1	385	178	18559	2.16653	1	0.996578	71.177
UP_SEQ_FEATURE	domain:EF-hand 2	8	1.93237	0.0777866	GUCA1B, NUCB1, S100A6, HPCAL1, CETN2, ITSN1, PDCD6, CALM1	401	185	20063	2.16356	1	0.992898	73.2878
UP_SEQ_FEATURE	domain:EF-hand 1	8	1.93237	0.0777866	GUCA1B, NUCB1, S100A6, HPCAL1, CETN2, ITSN1, PDCD6, CALM1	401	185	20063	2.16356	1	0.992898	73.2878
SMART	SM00054:EFh	7	1.69082	0.079596	GUCA1B, S100A6, HPCAL1, CETN2, ITSN1, PDCD6, CALM1	210	144	10057	2.32801	1	0.859074	64.298
INTERPRO	IPR002048:EF-hand domain	9	2.17391	0.102143	GUCA1B, NUCB1, S100A6, HPCAL1, CETN2, ITSN1, PDCD6, TBC1D9B, CALM1	385	228	18559	1.90284	1	0.996666	81.105
UP_SEQ_FEATURE	domain:EF-hand 3	5	1.20773	0.12534	GUCA1B, HPCAL1, CETN2, PDCD6, CALM1	401	96	20063	2.60586	1	0.998277	88.7303
INTERPRO	IPR011992:EF-hand-like domain	10	2.41546	0.126457	GUCA1B, NUCB1, STAT6, S100A6, HPCAL1, CETN2, ITSN1, PDCD6, TBC1D9B, CALM1	385	279	18559	1.72778	1	0.998274	87.6419
GOTERM_MF_DIRECT	GO:0005509~calcium ion binding	18	4.34783	0.373975	PCDHB9, GALNT3, GUCA1B, S100A6, HPCAL1, MASP1, LTBP3, PADI2, CETN2, ITPR3, ITSN1, ANXA2, NUCB1, ANXA11, CCBE1, PDCD6, TBC1D9B, CALM1	364	717	16881	1.16426	1	0.996872	99.9051
Annotation Cluster 11	Enrichment Score: 1.0604924848800414
Category	Term	Count	%	PValue	Genes	List Total	Pop Hits	Pop Total	Fold Enrichment	Bonferroni	Benjamini	FDR
GOTERM_MF_DIRECT	GO:0019903~protein phosphatase binding	5	1.20773	0.0465111	STAT6, JUP, ERBB2, LCK, PIK3R1	364	63	16881	3.68066	1	0.934066	50.7279
SMART	SM00252:SH2	6	1.44928	0.0632265	STAT6, LCK, GRB7, SHE, PIK3R1, SUPT6H	210	103	10057	2.78974	0.999996	0.872212	55.561
INTERPRO	IPR000980:SH2 domain	6	1.44928	0.0855541	STAT6, LCK, GRB7, SHE, PIK3R1, SUPT6H	385	113	18559	2.55957	1	0.997054	74.9214
UP_SEQ_FEATURE	domain:SH2	5	1.20773	0.12534	STAT6, LCK, GRB7, SHE, SUPT6H	401	96	20063	2.60586	1	0.998277	88.7303
UP_KEYWORDS	SH2 domain	5	1.20773	0.158035	STAT6, LCK, GRB7, SHE, PIK3R1	400	108	20581	2.38206	1	0.702141	90.4401
Annotation Cluster 12	Enrichment Score: 1.0494065722722459
Category	Term	Count	%	PValue	Genes	List Total	Pop Hits	Pop Total	Fold Enrichment	Bonferroni	Benjamini	FDR
GOTERM_BP_DIRECT	GO:0018279~protein N-linked glycosylation via asparagine	5	1.20773	0.0105339	MGAT2, ST3GAL4, RPN1, UBE2J1, DPM2	363	40	16792	5.78237	1	0.947343	16.5973
KEGG_PATHWAY	hsa00510:N-Glycan biosynthesis	4	0.966184	0.0995259	MGAT2, ALG3, RPN1, DPM2	158	49	6910	3.57014	1	0.909345	73.8959
UP_KEYWORDS	Congenital disorder of glycosylation	3	0.724638	0.195588	MGAT2, ALG3, DPM2	400	42	20581	3.67518	1	0.738374	94.8712
UP_KEYWORDS	Glycosyltransferase	7	1.69082	0.309391	GALNT3, MGAT2, ST3GAL4, DPY19L2P2, ALG3, RPN1, DPM2	400	236	20581	1.52613	1	0.793344	99.3604
Annotation Cluster 13	Enrichment Score: 1.0005926571539099
Category	Term	Count	%	PValue	Genes	List Total	Pop Hits	Pop Total	Fold Enrichment	Bonferroni	Benjamini	FDR
UP_KEYWORDS	Metal-binding	87	21.0145	0.0260369	CSH1, BMI1, IMPAD1, S100A6, PDP2, MASP1, ADCY6, EIF5B, DPH3, ITSN1, GLI3, ASGR1, ZNF682, SMPDL3A, PLOD2, CUL9, CTDSP1, PDE8B, MICAL1, TRPV6, ZYX, YOD1, NR2F2, GATAD1, ZNF493, ZNF43, PAN3, PDXK, ZCCHC11, BRF1, RARG, LIG1, ZNF544, UBR1, DMRTB1, SUZ12, NUCB1, ZNF789, LIMCH1, ZNF277, DEAF1, GALNT3, PRKCZ, CNBP, LIMS2, CYP51A1, ZNF133, USP5, CETN2, RIOK1, ESYT1, NR2C1, RPA1, NPAS2, TROVE2, ZNF429, FCN…	400	3640	20581	1.22977	0.999889	0.478019	30.2357
UP_KEYWORDS	Zinc	54	13.0435	0.131777	BMI1, CSH1, DPH3, GLI3, ZNF682, SMPDL3A, CUL9, MICAL1, ZYX, YOD1, GATAD1, NR2F2, ZNF493, ZNF43, BRF1, PDXK, ZCCHC11, RARG, PAN3, ZNF544, UBR1, DMRTB1, SUZ12, ZNF789, LIMCH1, ZNF277, DEAF1, PRKCZ, CNBP, LIMS2, ZNF133, USP5, NR2C1, RPA1, ZNF429, BCL6, SLC39A6, LIMS3, ZNF562, UNKL, ESRRA, AGBL5, ZNF160, SIRT5, MID1, MARCH6, ZBTB43, RASSF5, PHF2, DGKZ, CACNA1H, LTA4H, PAPPA2, RNF19B	400	2348	20581	1.18332	1	0.669772	85.4632
UP_KEYWORDS	Zinc-finger	39	9.42029	0.290264	BMI1, DEAF1, PRKCZ, CNBP, ZNF133, USP5, DPH3, GLI3, NR2C1, RPA1, ZNF682, ZNF429, CUL9, BCL6, YOD1, NR2F2, GATAD1, ZNF562, UNKL, ZNF493, ZNF43, ESRRA, BRF1, ZCCHC11, PAN3, RARG, ZNF544, ZNF160, UBR1, MARCH6, MID1, ZBTB43, SUZ12, RASSF5, PHF2, ZNF789, ZNF277, DGKZ, RNF19B	400	1781	20581	1.1267	1	0.784803	99.0714
Annotation Cluster 14	Enrichment Score: 0.9743763225649009
Category	Term	Count	%	PValue	Genes	List Total	Pop Hits	Pop Total	Fold Enrichment	Bonferroni	Benjamini	FDR
UP_KEYWORDS	Steroid metabolism	5	1.20773	0.0860326	CYP51A1, LCAT, ERLIN2, AKR1D1, NSDHL	400	86	20581	2.99142	1	0.588008	70.7045
UP_KEYWORDS	Cholesterol metabolism	4	0.966184	0.0985593	CYP51A1, LCAT, ERLIN2, NSDHL	400	57	20581	3.6107	1	0.619969	75.7337
UP_KEYWORDS	Sterol metabolism	4	0.966184	0.14077	CYP51A1, LCAT, ERLIN2, NSDHL	400	67	20581	3.07179	1	0.671652	87.3888
Annotation Cluster 15	Enrichment Score: 0.9209953122419573
Category	Term	Count	%	PValue	Genes	List Total	Pop Hits	Pop Total	Fold Enrichment	Bonferroni	Benjamini	FDR
UP_KEYWORDS	Initiation factor	5	1.20773	0.0259778	EIF4G1, EIF4G2, EIF4EBP2, BRF1, EIF5B	400	58	20581	4.43556	0.999886	0.502681	30.1779
GOTERM_MF_DIRECT	GO:0003743~translation initiation factor activity	5	1.20773	0.0421075	EIF4G1, EIF4G2, EIF4EBP2, BRF1, EIF5B	364	61	16881	3.80134	1	0.950304	47.2356
UP_KEYWORDS	Translation regulation	6	1.44928	0.0536611	EIF4G1, EIF4G2, EIF4EBP2, MKNK1, EPRS, TNRC6B	400	105	20581	2.94014	1	0.595907	52.8918
UP_KEYWORDS	Protein biosynthesis	7	1.69082	0.0759532	EIF4G1, EIF4G2, EIF4EBP2, BRF1, EIF5B, EPRS, TCEB1	400	152	20581	2.36952	1	0.584848	65.9743
GOTERM_BP_DIRECT	GO:0006446~regulation of translational initiation	3	0.724638	0.181648	EIF4G1, EIF4G2, EIF5B	363	36	16792	3.85491	1	0.998499	96.7793
KEGG_PATHWAY	hsa03013:RNA transport	5	1.20773	0.552688	EIF4G1, EIF4G2, EIF4EBP2, EIF5B, NMD3	158	172	6910	1.27134	1	0.953602	99.9967
GOTERM_BP_DIRECT	GO:0006413~translational initiation	3	0.724638	0.798277	EIF4G1, EIF4G2, EIF5B	363	137	16792	1.01297	1	1	100
Annotation Cluster 16	Enrichment Score: 0.9190461936614734
Category	Term	Count	%	PValue	Genes	List Total	Pop Hits	Pop Total	Fold Enrichment	Bonferroni	Benjamini	FDR
KEGG_PATHWAY	hsa04066:HIF-1 signaling pathway	7	1.69082	0.0237092	LTBR, BCL2, ERBB2, SLC2A1, MKNK1, TCEB1, PIK3R1	158	98	6910	3.12387	0.995892	0.599803	26.465
KEGG_PATHWAY	hsa05211:Renal cell carcinoma	4	0.966184	0.183194	ARNT2, SLC2A1, TCEB1, PIK3R1	158	65	6910	2.69133	1	0.889928	92.5164
KEGG_PATHWAY	hsa05200:Pathways in cancer	11	2.657	0.402748	JUP, RASSF5, BCL2, ERBB2, ARNT2, ADCY6, SLC2A1, TCEB1, BCL2L1, GLI3, PIK3R1	158	393	6910	1.22411	1	0.918836	99.8644
Annotation Cluster 17	Enrichment Score: 0.8103826197759667
Category	Term	Count	%	PValue	Genes	List Total	Pop Hits	Pop Total	Fold Enrichment	Bonferroni	Benjamini	FDR
UP_KEYWORDS	Collagen	5	1.20773	0.122971	COL7A1, FCN3, C1QTNF1, CCBE1, SCARA3	400	98	20581	2.62513	1	0.659669	83.3167
GOTERM_CC_DIRECT	GO:0005581~collagen trimer	5	1.20773	0.125115	COL7A1, FCN3, C1QTNF1, CCBE1, SCARA3	380	92	18224	2.60641	1	0.820097	84.3385
INTERPRO	IPR008160:Collagen triple helix repeat	4	0.966184	0.240847	COL7A1, C1QTNF1, CCBE1, SCARA3	385	82	18559	2.35147	1	0.999874	98.5898
Annotation Cluster 18	Enrichment Score: 0.8027513288145479
Category	Term	Count	%	PValue	Genes	List Total	Pop Hits	Pop Total	Fold Enrichment	Bonferroni	Benjamini	FDR
GOTERM_BP_DIRECT	GO:0006284~base-excision repair	4	0.966184	0.0391119	RPA1, LIG1, TDG, HMGA2	363	35	16792	5.28674	1	0.986611	49.5289
GOTERM_BP_DIRECT	GO:0006298~mismatch repair	3	0.724638	0.17389	RPA1, LIG1, TDG	363	35	16792	3.96505	1	0.998529	96.2141
GOTERM_BP_DIRECT	GO:0006281~DNA repair	6	1.44928	0.57433	RPA1, LIG1, MORF4L2, TDG, INO80E, RBBP8	363	235	16792	1.18108	1	0.999988	100
Annotation Cluster 19	Enrichment Score: 0.7637349490497958
Category	Term	Count	%	PValue	Genes	List Total	Pop Hits	Pop Total	Fold Enrichment	Bonferroni	Benjamini	FDR
INTERPRO	IPR017853:Glycoside hydrolase, superfamily	4	0.966184	0.100922	HPSE, HEXB, GAA, GBA	385	54	18559	3.57076	1	0.997539	80.7038
GOTERM_CC_DIRECT	GO:0043202~lysosomal lumen	5	1.20773	0.101072	HPSE, HEXB, GAA, PPT1, GBA	380	85	18224	2.82105	1	0.781146	77.1889
INTERPRO	IPR013781:Glycoside hydrolase, catalytic domain	3	0.724638	0.177899	HPSE, HEXB, GBA	385	37	18559	3.90853	1	0.99947	95.166
UP_SEQ_FEATURE	active site:Proton donor	7	1.69082	0.210552	HPSE, HEXB, CTDSP1, PDE8B, LTA4H, AKR1D1, GBA	401	200	20063	1.75113	1	0.999828	97.8804
UP_KEYWORDS	Glycosidase	4	0.966184	0.212714	HEXB, GAA, TDG, GBA	400	82	20581	2.50988	1	0.730101	96.1765
GOTERM_BP_DIRECT	GO:0005975~carbohydrate metabolic process	6	1.44928	0.321845	GALNT3, PGLS, HPSE, HEXB, GAA, GBA	363	174	16792	1.59514	1	0.999478	99.8714
Annotation Cluster 20	Enrichment Score: 0.7370744788935144
Category	Term	Count	%	PValue	Genes	List Total	Pop Hits	Pop Total	Fold Enrichment	Bonferroni	Benjamini	FDR
INTERPRO	IPR012340:Nucleic acid-binding, OB-fold	5	1.20773	0.0754509	RPA1, MCM8, LIG1, MCM4, SUPT6H	385	77	18559	3.13021	1	0.99762	70.2763
GOTERM_BP_DIRECT	GO:0000082~G1/S transition of mitotic cell cycle	5	1.20773	0.178202	RPA1, MCM8, CRLF3, MCM4, RBBP8	363	102	16792	2.2676	1	0.998456	96.5388
KEGG_PATHWAY	hsa03030:DNA replication	3	0.724638	0.196697	RPA1, LIG1, MCM4	158	36	6910	3.64451	1	0.887039	93.9555
GOTERM_BP_DIRECT	GO:0000724~double-strand break repair via homologous recombination	4	0.966184	0.214021	RPA1, MCM8, NUCKS1, RBBP8	363	74	16792	2.50048	1	0.998763	98.3874
GOTERM_BP_DIRECT	GO:0006260~DNA replication	6	1.44928	0.24308	RPA1, MCM8, LIG1, INO80E, MCM4, RBBP8	363	155	16792	1.79067	1	0.99904	99.1545
UP_KEYWORDS	DNA replication	4	0.966184	0.274773	RPA1, MCM8, LIG1, MCM4	400	94	20581	2.18947	1	0.767391	98.7531
Annotation Cluster 21	Enrichment Score: 0.6780948678962441
Category	Term	Count	%	PValue	Genes	List Total	Pop Hits	Pop Total	Fold Enrichment	Bonferroni	Benjamini	FDR
UP_KEYWORDS	Thiol protease	7	1.69082	0.0778346	USP30, PIGK, ATG4A, USP5, FAM188B, BAP1, YOD1	400	153	20581	2.35404	1	0.57136	66.9077
GOTERM_BP_DIRECT	GO:0071108~protein K48-linked deubiquitination	3	0.724638	0.0937586	USP5, BAP1, YOD1	363	24	16792	5.78237	1	0.99436	81.4973
GOTERM_MF_DIRECT	GO:0004843~thiol-dependent ubiquitin-specific protease activity	4	0.966184	0.247125	USP30, USP5, BAP1, YOD1	364	80	16881	2.31882	1	0.996192	98.5279
GOTERM_BP_DIRECT	GO:0006511~ubiquitin-dependent protein catabolic process	6	1.44928	0.35643	USP30, CUL9, USP5, BAP1, TRPC4AP, TCEB1	363	182	16792	1.52502	1	0.999694	99.9476
GOTERM_BP_DIRECT	GO:0016579~protein deubiquitination	3	0.724638	0.633069	USP30, USP5, BAP1	363	99	16792	1.40179	1	0.999996	100
Annotation Cluster 22	Enrichment Score: 0.6612980136378366
Category	Term	Count	%	PValue	Genes	List Total	Pop Hits	Pop Total	Fold Enrichment	Bonferroni	Benjamini	FDR
UP_KEYWORDS	Microtubule	10	2.41546	0.0962385	GABARAPL1, RASSF5, DYNC1LI2, NDEL1, KATNA1, TUBA4A, NDRG1, MID1, DYNC1I2, DISC1	400	280	20581	1.83759	1	0.620816	74.867
GOTERM_CC_DIRECT	GO:0005874~microtubule	10	2.41546	0.201008	GABARAPL1, RASSF5, DYNC1LI2, NDEL1, KATNA1, TUBA4A, NDRG1, MID1, DYNC1I2, DISC1	380	311	18224	1.54205	1	0.897056	95.5515
GOTERM_CC_DIRECT	GO:0005813~centrosome	10	2.41546	0.536468	DYNC1LI2, NDEL1, PROCR, KATNA1, CETN2, NDRG1, BCL2L1, DYNC1I2, DISC1, CALM1	380	426	18224	1.12577	1	0.976413	99.9977
Annotation Cluster 23	Enrichment Score: 0.6465287080819067
Category	Term	Count	%	PValue	Genes	List Total	Pop Hits	Pop Total	Fold Enrichment	Bonferroni	Benjamini	FDR
GOTERM_MF_DIRECT	GO:0019903~protein phosphatase binding	5	1.20773	0.0465111	STAT6, JUP, ERBB2, LCK, PIK3R1	364	63	16881	3.68066	1	0.934066	50.7279
GOTERM_BP_DIRECT	GO:0048015~phosphatidylinositol-mediated signaling	5	1.20773	0.195568	EZR, ERBB2, LCK, TNRC6B, PIK3R1	363	106	16792	2.18203	1	0.998663	97.5997
GOTERM_BP_DIRECT	GO:0046854~phosphatidylinositol phosphorylation	4	0.966184	0.330551	IMPAD1, ERBB2, LCK, PIK3R1	363	94	16792	1.96847	1	0.999527	99.8969
GOTERM_MF_DIRECT	GO:0046934~phosphatidylinositol-4,5-bisphosphate 3-kinase activity	3	0.724638	0.386371	ERBB2, LCK, PIK3R1	364	62	16881	2.24402	1	0.996585	99.9295
GOTERM_BP_DIRECT	GO:0014066~regulation of phosphatidylinositol 3-kinase signaling	3	0.724638	0.503803	ERBB2, LCK, PIK3R1	363	78	16792	1.77919	1	0.999965	99.9994
Annotation Cluster 24	Enrichment Score: 0.6108657289337517
Category	Term	Count	%	PValue	Genes	List Total	Pop Hits	Pop Total	Fold Enrichment	Bonferroni	Benjamini	FDR
SMART	SM00033:CH	4	0.966184	0.157569	SYNE1, LIMCH1, MICAL1, FLNB	210	66	10057	2.90245	1	0.960862	88.1068
INTERPRO	IPR001715:Calponin homology domain	4	0.966184	0.208157	SYNE1, LIMCH1, MICAL1, FLNB	385	76	18559	2.53712	1	0.999735	97.2933
GOTERM_MF_DIRECT	GO:0003779~actin binding	9	2.17391	0.249585	ALDOA, SYNE1, EZR, MYO1C, LIMCH1, MICAL1, FLNB, AFAP1, KLHL20	364	278	16881	1.50139	1	0.995764	98.5978
UP_KEYWORDS	Actin-binding	7	1.69082	0.440004	SYNE1, MYO1C, SSFA2, MICAL1, FLNB, AFAP1, KLHL20	400	274	20581	1.31448	1	0.872835	99.9634
Annotation Cluster 25	Enrichment Score: 0.5945673468124143
Category	Term	Count	%	PValue	Genes	List Total	Pop Hits	Pop Total	Fold Enrichment	Bonferroni	Benjamini	FDR
GOTERM_BP_DIRECT	GO:0006914~autophagy	6	1.44928	0.160207	LAMP1, ATG10, GABARAPL1, TMEM59, ATG4A, VPS37B	363	133	16792	2.08687	1	0.997925	94.983
KEGG_PATHWAY	hsa04140:Regulation of autophagy	3	0.724638	0.221795	ATG10, GABARAPL1, ATG4A	158	39	6910	3.36417	1	0.890153	95.9751
UP_KEYWORDS	Autophagy	4	0.966184	0.463089	ATG10, GABARAPL1, TMEM59, ATG4A	400	130	20581	1.58315	1	0.885515	99.9794
Annotation Cluster 26	Enrichment Score: 0.5906598068732236
Category	Term	Count	%	PValue	Genes	List Total	Pop Hits	Pop Total	Fold Enrichment	Bonferroni	Benjamini	FDR
UP_KEYWORDS	Membrane	168	40.5797	0.0134489	S100A6, IMPAD1, TMEM18, AQP9, ATP6AP2, VTCN1, ADCY6, RRAD, TNFSF14, ITSN1, DAB2, CHIC2, ST3GAL4, PLOD2, LCAT, PGRMC1, SLC2A1, RPN1, HIGD1A, DISC1, FLVCR2, TBC1D9B, C1GALT1C1, TMEM167A, SPTLC3, MADD, UBE2J1, SYNJ2BP, JUP, MGAT2, SPAG9, OR52K1, CCR4, TMEM139, RAB15, HSD11B2, MFAP3, VAMP2, OR5AR1, ALDOA, CAV1, RALGPS1, CYP51A1, TMEM216, ERBB2, SFXN3, RER1, BCL2L1, OCRL, OR2L13, SORCS3, SLC11A2, PROC…	400	7494	20581	1.15346	0.99064	0.404908	16.8721
UP_KEYWORDS	Transmembrane helix	117	28.2609	0.237165	IMPAD1, TMEM18, AQP9, VTCN1, ATP6AP2, ADCY6, TNFSF14, ITSN1, ST3GAL4, PGRMC1, LCAT, SLC2A1, RPN1, FLVCR2, HIGD1A, TBC1D9B, C1GALT1C1, TMEM167A, SPTLC3, UBE2J1, SYNJ2BP, SPAG9, MGAT2, OR52K1, CCR4, TMEM139, HSD11B2, VAMP2, MFAP3, OR5AR1, ALDOA, CAV1, CYP51A1, TMEM216, ERBB2, SFXN3, RER1, BCL2L1, OR2L13, SORCS3, SLC11A2, PROCR, FKRP, SASH1, ABCB9, PTPN5, MAOB, SLCO2B1, FURIN, AGER, LAMP1, SYNE1, GR…	400	5634	20581	1.0685	1	0.746775	97.5142
UP_KEYWORDS	Transmembrane	117	28.2609	0.248932	IMPAD1, TMEM18, AQP9, VTCN1, ATP6AP2, ADCY6, TNFSF14, ITSN1, ST3GAL4, PGRMC1, LCAT, SLC2A1, RPN1, FLVCR2, HIGD1A, TBC1D9B, C1GALT1C1, TMEM167A, SPTLC3, UBE2J1, SYNJ2BP, SPAG9, MGAT2, OR52K1, CCR4, TMEM139, HSD11B2, VAMP2, MFAP3, OR5AR1, ALDOA, CAV1, CYP51A1, TMEM216, ERBB2, SFXN3, RER1, BCL2L1, OR2L13, SORCS3, SLC11A2, PROCR, FKRP, SASH1, ABCB9, PTPN5, MAOB, SLCO2B1, FURIN, AGER, LAMP1, SYNE1, GR…	400	5651	20581	1.06529	1	0.751169	97.9894
GOTERM_CC_DIRECT	GO:0016021~integral component of membrane	113	27.2947	0.3151	IMPAD1, TMEM18, AQP9, VTCN1, ATP6AP2, ADCY6, TNFSF14, ITSN1, ST3GAL4, PGRMC1, LCAT, SLC2A1, RPN1, FLVCR2, HIGD1A, TBC1D9B, C1GALT1C1, RARG, TMEM167A, SPTLC3, MADD, UBE2J1, SPAG9, MGAT2, OR52K1, CCR4, TMEM139, HSD11B2, VAMP2, MFAP3, OR5AR1, CAV1, CYP51A1, TMEM216, ERBB2, SFXN3, RER1, BCL2L1, OR2L13, SORCS3, SLC11A2, FKRP, SASH1, ABCB9, PTPN5, MAOB, SLCO2B1, FURIN, AGER, LAMP1, SYNE1, GRINA, CACNA1…	380	5163	18224	1.04963	1	0.932689	99.4751
UP_SEQ_FEATURE	transmembrane region	104	25.1208	0.418277	IMPAD1, TMEM18, AQP9, VTCN1, ATP6AP2, ADCY6, TNFSF14, ST3GAL4, PGRMC1, SLC2A1, RPN1, FLVCR2, HIGD1A, TBC1D9B, C1GALT1C1, TMEM167A, MADD, SPTLC3, UBE2J1, SYNJ2BP, MGAT2, OR52K1, CCR4, TMEM139, VAMP2, MFAP3, OR5AR1, CAV1, CYP51A1, TMEM216, ERBB2, SFXN3, RER1, BCL2L1, OR2L13, SORCS3, SLC11A2, PROCR, ABCB9, MAOB, SLCO2B1, FURIN, AGER, LAMP1, SYNE1, GRINA, CACNA1H, SCARA3, SLC5A10, SLC25A15, ENG, ATP6…	401	5056	20063	1.02915	1	0.999996	99.9854
UP_SEQ_FEATURE	topological domain:Cytoplasmic	66	15.942	0.718914	TMEM18, AQP9, SLC20A1, LRRC8A, ATP6AP2, VTCN1, ADCY6, TNFSF14, ASGR1, PIGK, CXCR5, ST3GAL4, TMEM59, SLC2A1, RPN1, TRPV6, KCNG4, HIGD1A, PCDHB9, C1GALT1C1, LTBR, TMEM167A, PGAP1, UBE2J1, ERLIN2, SYNJ2BP, MGAT2, CCR4, OR52K1, TMEM139, VAMP2, MFAP3, OR5AR1, GALNT3, USP30, CAV1, LRRC32, ERBB2, SLC19A3, CLDN14, OR2L13, SORCS3, SLC11A2, PROCR, SLC39A6, CRIM1, FAM174B, PLP1, OR8G2, SLC12A4, MAOB, MARCH6…	401	3456	20063	0.95548	1	1	100
UP_SEQ_FEATURE	topological domain:Extracellular	44	10.628	0.974931	TMEM18, AQP9, SLC20A1, LRRC8A, VTCN1, LRRC32, ATP6AP2, ERBB2, ADCY6, TNFSF14, SLC19A3, CLDN14, OR2L13, ASGR1, SLC11A2, PROCR, CXCR5, TMEM59, SLC2A1, SLC39A6, TRPV6, CRIM1, HIGD1A, PCDHB9, FAM174B, PLP1, LTBR, TMEM167A, OR8G2, MARCH6, ITPR3, AGER, LOC728138, SLC16A3, SLC16A5, OR52K1, CCR4, TMEM139, CACNA1H, SCARA3, MFAP3, OR5AR1, SLC5A10, ENG	401	2787	20063	0.789891	1	1	100
Annotation Cluster 27	Enrichment Score: 0.5774641581210491
Category	Term	Count	%	PValue	Genes	List Total	Pop Hits	Pop Total	Fold Enrichment	Bonferroni	Benjamini	FDR
UP_KEYWORDS	Centromere	6	1.44928	0.128023	PPP2R1A, NDEL1, PHF2, PPP2R5A, FBXO28, SS18L1	400	137	20581	2.25339	1	0.666837	84.5816
GOTERM_CC_DIRECT	GO:0000776~kinetochore	4	0.966184	0.237612	NDEL1, PHF2, FBXO28, SS18L1	380	81	18224	2.36829	1	0.901837	97.6787
GOTERM_CC_DIRECT	GO:0000777~condensed chromosome kinetochore	4	0.966184	0.271187	NDEL1, PHF2, FBXO28, SS18L1	380	87	18224	2.20496	1	0.912472	98.7571
UP_KEYWORDS	Kinetochore	4	0.966184	0.301201	NDEL1, PHF2, FBXO28, SS18L1	400	99	20581	2.07889	1	0.795093	99.2487
UP_KEYWORDS	Chromosome	9	2.17391	0.521671	PPP2R1A, NDEL1, PHF2, PPP2R5A, FBXO28, MBD3, SS18L1, HIST2H3D, RBBP8	400	400	20581	1.15768	1	0.905179	99.9957
Annotation Cluster 28	Enrichment Score: 0.5705298860173796
Category	Term	Count	%	PValue	Genes	List Total	Pop Hits	Pop Total	Fold Enrichment	Bonferroni	Benjamini	FDR
SMART	SM00233:PH	9	2.17391	0.184218	ARHGAP21, RALGPS1, FAM109B, ARHGAP24, ITSN1, AFAP1, GRB7, PLEKHA2, ARHGAP26	210	264	10057	1.63263	1	0.959515	92.0211
INTERPRO	IPR001849:Pleckstrin homology domain	9	2.17391	0.200921	ARHGAP21, RALGPS1, FAM109B, ARHGAP24, ITSN1, AFAP1, GRB7, PLEKHA2, ARHGAP26	385	271	18559	1.60091	1	0.999741	96.8845
UP_SEQ_FEATURE	domain:PH	7	1.69082	0.360645	ARHGAP21, RALGPS1, FAM109B, ARHGAP24, ITSN1, GRB7, ARHGAP26	401	245	20063	1.4295	1	0.99999	99.9319
INTERPRO	IPR011993:Pleckstrin homology-like domain	11	2.657	0.391239	ARHGAP21, DAB2, EZR, RALGPS1, FAM109B, ARHGAP24, ITSN1, AFAP1, GRB7, PLEKHA2, ARHGAP26	385	427	18559	1.24182	1	0.999992	99.9536
Annotation Cluster 29	Enrichment Score: 0.5644332483877297
Category	Term	Count	%	PValue	Genes	List Total	Pop Hits	Pop Total	Fold Enrichment	Bonferroni	Benjamini	FDR
UP_KEYWORDS	DNA recombination	4	0.966184	0.207681	RPA1, LIG1, ACTR5, INO80E	400	81	20581	2.54086	1	0.737773	95.829
UP_KEYWORDS	DNA repair	9	2.17391	0.212538	RPA1, MCM8, LIG1, ACTR5, MORF4L2, TDG, CETN2, INO80E, RBBP8	400	293	20581	1.58045	1	0.735413	96.1648
GOTERM_BP_DIRECT	GO:0006260~DNA replication	6	1.44928	0.24308	RPA1, MCM8, LIG1, INO80E, MCM4, RBBP8	363	155	16792	1.79067	1	0.99904	99.1545
UP_KEYWORDS	DNA damage	10	2.41546	0.250736	RPA1, NPAS2, MCM8, LIG1, ACTR5, MORF4L2, TDG, CETN2, INO80E, RBBP8	400	352	20581	1.46172	1	0.74922	98.0543
GOTERM_BP_DIRECT	GO:0006310~DNA recombination	4	0.966184	0.265731	RPA1, LIG1, ACTR5, INO80E	363	83	16792	2.22935	1	0.999151	99.4977
GOTERM_BP_DIRECT	GO:0006281~DNA repair	6	1.44928	0.57433	RPA1, LIG1, MORF4L2, TDG, INO80E, RBBP8	363	235	16792	1.18108	1	0.999988	100
Annotation Cluster 30	Enrichment Score: 0.5182965574351442
Category	Term	Count	%	PValue	Genes	List Total	Pop Hits	Pop Total	Fold Enrichment	Bonferroni	Benjamini	FDR
UP_KEYWORDS	SH3 domain	7	1.69082	0.240934	SASH1, SH3PXD2A, LCK, NCKIPSD, ITSN1, PIK3R1, ARHGAP26	400	215	20581	1.6752	1	0.748001	97.6767
SMART	SM00326:SH3	7	1.69082	0.254502	SASH1, SH3PXD2A, LCK, NCKIPSD, ITSN1, PIK3R1, ARHGAP26	210	206	10057	1.62735	1	0.986018	97.3934
INTERPRO	IPR001452:Src homology-3 domain	7	1.69082	0.297926	SASH1, SH3PXD2A, LCK, NCKIPSD, ITSN1, PIK3R1, ARHGAP26	385	218	18559	1.54787	1	0.999954	99.579
UP_SEQ_FEATURE	domain:SH3	5	1.20773	0.462505	SASH1, LCK, NCKIPSD, PIK3R1, ARHGAP26	401	175	20063	1.4295	1	0.999997	99.996
Annotation Cluster 31	Enrichment Score: 0.5099962808345003
Category	Term	Count	%	PValue	Genes	List Total	Pop Hits	Pop Total	Fold Enrichment	Bonferroni	Benjamini	FDR
KEGG_PATHWAY	hsa05205:Proteoglycans in cancer	8	1.93237	0.169602	ACTB, CAV1, EZR, HPSE, ERBB2, ITPR3, FLNB, PIK3R1	158	200	6910	1.74937	1	0.918203	90.7544
KEGG_PATHWAY	hsa04510:Focal adhesion	7	1.69082	0.326589	ACTB, CAV1, BCL2, ERBB2, ZYX, FLNB, PIK3R1	158	206	6910	1.48611	1	0.913465	99.369
KEGG_PATHWAY	hsa05100:Bacterial invasion of epithelial cells	3	0.724638	0.532816	ACTB, CAV1, PIK3R1	158	78	6910	1.68208	1	0.947861	99.9942
Annotation Cluster 32	Enrichment Score: 0.4829618106366764
Category	Term	Count	%	PValue	Genes	List Total	Pop Hits	Pop Total	Fold Enrichment	Bonferroni	Benjamini	FDR
GOTERM_CC_DIRECT	GO:0005913~cell-cell adherens junction	10	2.41546	0.231814	ALDOA, EIF4G1, JUP, EIF4G2, EZR, NDRG1, ZYX, FLNB, GOLGA3, ANXA2	380	323	18224	1.48476	1	0.900499	97.4215
GOTERM_MF_DIRECT	GO:0098641~cadherin binding involved in cell-cell adhesion	9	2.17391	0.286125	ALDOA, EIF4G1, JUP, EIF4G2, EZR, NDRG1, FLNB, GOLGA3, ANXA2	364	290	16881	1.43927	1	0.994967	99.3322
GOTERM_BP_DIRECT	GO:0098609~cell-cell adhesion	7	1.69082	0.536313	ALDOA, EIF4G1, EIF4G2, NDRG1, FLNB, GOLGA3, ANXA2	363	271	16792	1.19488	1	0.99998	99.9998
Annotation Cluster 33	Enrichment Score: 0.4664923240132003
Category	Term	Count	%	PValue	Genes	List Total	Pop Hits	Pop Total	Fold Enrichment	Bonferroni	Benjamini	FDR
GOTERM_MF_DIRECT	GO:0004867~serine-type endopeptidase inhibitor activity	5	1.20773	0.156295	SERPINA10, COL7A1, SPINT1, FURIN, CRIM1	364	97	16881	2.39053	1	0.986007	92
UP_SEQ_FEATURE	site:Reactive bond	3	0.724638	0.226038	SERPINA10, COL7A1, SPINT1	401	45	20063	3.33549	1	0.999825	98.4654
GOTERM_BP_DIRECT	GO:0010951~negative regulation of endopeptidase activity	5	1.20773	0.264576	SERPINA10, COL7A1, SPINT1, FURIN, CRIM1	363	121	16792	1.91153	1	0.999191	99.4839
UP_SEQ_FEATURE	short sequence motif:Cell attachment site	4	0.966184	0.272566	COL7A1, FURIN, ENG, CRIM1	401	91	20063	2.19923	1	0.999907	99.4414
UP_KEYWORDS	Serine protease inhibitor	3	0.724638	0.499008	SERPINA10, COL7A1, SPINT1	400	86	20581	1.79485	1	0.896788	99.992
GOTERM_BP_DIRECT	GO:0030198~extracellular matrix organization	5	1.20773	0.613042	COL7A1, HPSE, SPINT1, VWA1, FURIN	363	196	16792	1.18008	1	0.999994	100
UP_KEYWORDS	Protease inhibitor	3	0.724638	0.696319	SERPINA10, COL7A1, SPINT1	400	124	20581	1.24482	1	0.952435	100
Annotation Cluster 34	Enrichment Score: 0.45874595318423644
Category	Term	Count	%	PValue	Genes	List Total	Pop Hits	Pop Total	Fold Enrichment	Bonferroni	Benjamini	FDR
UP_KEYWORDS	ATP-binding	32	7.72947	0.227725	CHKA, PRKCZ, DYNC1LI2, BCKDK, ERBB2, ADCY6, MKNK1, RIOK1, MCM8, CLK2, KATNA1, CUL9, DDX24, CERK, AATK, ACTB, NLRP7, ABCB9, PAN3, PDXK, MYO1C, LIG1, UBE2J1, EPRS, MCM4, LCK, UCKL1, DGKZ, TSSK1B, PAPOLG, EP400, DDX51	400	1391	20581	1.18367	1	0.746296	97.0599
UP_KEYWORDS	Nucleotide-binding	40	9.66184	0.248373	CHKA, SEPT4, PRKCZ, DYNC1LI2, BCKDK, RAB5C, ERBB2, ADCY6, EIF5B, MKNK1, RRAD, RIOK1, MCM8, CLK2, KATNA1, CUL9, DDX24, CERK, AATK, ACTB, NLRP7, ABCB9, PAN3, RAB8B, PDXK, MYO1C, LIG1, UBE2J1, EPRS, MCM4, LCK, UCKL1, RAB15, TUBA4A, DGKZ, TSSK1B, PAPOLG, EP400, NKIRAS2, DDX51	400	1788	20581	1.15106	1	0.755168	97.9689
UP_SEQ_FEATURE	nucleotide phosphate-binding region:ATP	22	5.31401	0.422247	NLRP7, CHKA, PRKCZ, DYNC1LI2, ABCB9, PDXK, MYO1C, ERBB2, EPRS, MKNK1, MCM4, MCM8, CLK2, CUL9, KATNA1, DDX24, LCK, UCKL1, TSSK1B, EP400, DDX51, AATK	401	994	20063	1.10736	1	0.999995	99.9869
GOTERM_MF_DIRECT	GO:0005524~ATP binding	32	7.72947	0.612256	CHKA, PRKCZ, DYNC1LI2, BCKDK, ERBB2, ADCY6, MKNK1, RIOK1, MCM8, CLK2, KATNA1, CUL9, DDX24, CERK, AATK, ACTB, NLRP7, ABCB9, PAN3, PDXK, MYO1C, LIG1, UBE2J1, EPRS, MCM4, LCK, UCKL1, DGKZ, TSSK1B, PAPOLG, EP400, DDX51	364	1495	16881	0.992672	1	0.999602	99.9999
Annotation Cluster 35	Enrichment Score: 0.45265821499656655
Category	Term	Count	%	PValue	Genes	List Total	Pop Hits	Pop Total	Fold Enrichment	Bonferroni	Benjamini	FDR
KEGG_PATHWAY	hsa04071:Sphingolipid signaling pathway	6	1.44928	0.137117	PPP2R1A, PRKCZ, PPP2R5A, SPTLC3, BCL2, PIK3R1	158	120	6910	2.18671	1	0.910391	84.8837
KEGG_PATHWAY	hsa04261:Adrenergic signaling in cardiomyocytes	6	1.44928	0.237698	PPP2R1A, PPP2R5A, BCL2, ADCY6, PIK3R1, CALM1	158	146	6910	1.79729	1	0.882724	96.9106
KEGG_PATHWAY	hsa04152:AMPK signaling pathway	4	0.966184	0.527583	LEP, PPP2R1A, PPP2R5A, PIK3R1	158	122	6910	1.43391	1	0.948222	99.9933
KEGG_PATHWAY	hsa04151:PI3K-Akt signaling pathway	6	1.44928	0.899409	CSH1, PPP2R1A, PPP2R5A, BCL2, BCL2L1, PIK3R1	158	345	6910	0.760594	1	0.997631	100
Annotation Cluster 36	Enrichment Score: 0.44397861741425526
Category	Term	Count	%	PValue	Genes	List Total	Pop Hits	Pop Total	Fold Enrichment	Bonferroni	Benjamini	FDR
KEGG_PATHWAY	hsa04070:Phosphatidylinositol signaling system	6	1.44928	0.0717499	IMPAD1, DGKZ, OCRL, ITPR3, PIK3R1, CALM1	158	98	6910	2.6776	1	0.849598	61.4752
KEGG_PATHWAY	hsa04970:Salivary secretion	5	1.20773	0.131349	ADCY6, TRPV6, VAMP2, ITPR3, CALM1	158	86	6910	2.54268	1	0.931928	83.5367
KEGG_PATHWAY	hsa04750:Inflammatory mediator regulation of TRP channels	5	1.20773	0.182983	ADCY6, PLA2G6, ITPR3, PIK3R1, CALM1	158	98	6910	2.23134	1	0.901134	92.4916
KEGG_PATHWAY	hsa04971:Gastric acid secretion	4	0.966184	0.230331	EZR, ADCY6, ITPR3, CALM1	158	73	6910	2.39639	1	0.891435	96.5055
KEGG_PATHWAY	hsa04114:Oocyte meiosis	5	1.20773	0.235187	PPP2R1A, PPP2R5A, ADCY6, ITPR3, CALM1	158	109	6910	2.00615	1	0.888404	96.7777
KEGG_PATHWAY	hsa04261:Adrenergic signaling in cardiomyocytes	6	1.44928	0.237698	PPP2R1A, PPP2R5A, BCL2, ADCY6, PIK3R1, CALM1	158	146	6910	1.79729	1	0.882724	96.9106
KEGG_PATHWAY	hsa04925:Aldosterone synthesis and secretion	4	0.966184	0.279408	ADCY6, CACNA1H, ITPR3, CALM1	158	81	6910	2.15971	1	0.918023	98.4976
KEGG_PATHWAY	hsa04728:Dopaminergic synapse	5	1.20773	0.331725	PPP2R1A, PPP2R5A, MAOB, ITPR3, CALM1	158	128	6910	1.70837	1	0.91187	99.428
KEGG_PATHWAY	hsa04611:Platelet activation	5	1.20773	0.342108	ACTB, PRKCZ, ADCY6, ITPR3, PIK3R1	158	130	6910	1.68208	1	0.909023	99.532
KEGG_PATHWAY	hsa04713:Circadian entrainment	4	0.966184	0.366864	ADCY6, CACNA1H, ITPR3, CALM1	158	95	6910	1.84144	1	0.917266	99.7137
KEGG_PATHWAY	hsa04915:Estrogen signaling pathway	4	0.966184	0.391684	ADCY6, ITPR3, PIK3R1, CALM1	158	99	6910	1.76704	1	0.915795	99.8285
KEGG_PATHWAY	hsa04924:Renin secretion	3	0.724638	0.429165	ADCY6, ITPR3, CALM1	158	64	6910	2.05004	1	0.923296	99.924
KEGG_PATHWAY	hsa04725:Cholinergic synapse	4	0.966184	0.464392	BCL2, ADCY6, ITPR3, PIK3R1	158	111	6910	1.57601	1	0.932638	99.9664
KEGG_PATHWAY	hsa04921:Oxytocin signaling pathway	5	1.20773	0.488611	ACTB, ADCY6, ITPR3, PIK3R1, CALM1	158	158	6910	1.38399	1	0.938716	99.9814
KEGG_PATHWAY	hsa04270:Vascular smooth muscle contraction	4	0.966184	0.510742	ADCY6, PLA2G6, ITPR3, CALM1	158	119	6910	1.47006	1	0.946243	99.9895
KEGG_PATHWAY	hsa04015:Rap1 signaling pathway	6	1.44928	0.522275	ACTB, PRKCZ, RASSF5, ADCY6, PIK3R1, CALM1	158	210	6910	1.24955	1	0.948586	99.9922
KEGG_PATHWAY	hsa04062:Chemokine signaling pathway	5	1.20773	0.615047	PRKCZ, CXCR5, CCR4, ADCY6, PIK3R1	158	186	6910	1.17565	1	0.965377	99.9995
KEGG_PATHWAY	hsa04912:GnRH signaling pathway	3	0.724638	0.617017	ADCY6, ITPR3, CALM1	158	91	6910	1.44179	1	0.96421	99.9995
KEGG_PATHWAY	hsa04022:cGMP-PKG signaling pathway	4	0.966184	0.733322	ADCY6, ITPR3, PIK3R1, CALM1	158	166	6910	1.05384	1	0.983264	100
KEGG_PATHWAY	hsa04020:Calcium signaling pathway	4	0.966184	0.778719	ERBB2, CACNA1H, ITPR3, CALM1	158	179	6910	0.9773	1	0.986668	100
KEGG_PATHWAY	hsa04024:cAMP signaling pathway	4	0.966184	0.833532	ADCY6, GLI3, PIK3R1, CALM1	158	198	6910	0.883519	1	0.992463	100
Annotation Cluster 37	Enrichment Score: 0.43312473266443946
Category	Term	Count	%	PValue	Genes	List Total	Pop Hits	Pop Total	Fold Enrichment	Bonferroni	Benjamini	FDR
UP_KEYWORDS	Basement membrane	3	0.724638	0.181531	COL7A1, VWA1, ANXA2	400	40	20581	3.85894	1	0.715365	93.5032
GOTERM_CC_DIRECT	GO:0005604~basement membrane	3	0.724638	0.49141	COL7A1, VWA1, ANXA2	380	79	18224	1.82119	1	0.965972	99.9915
UP_KEYWORDS	Extracellular matrix	6	1.44928	0.562642	UCMA, HAPLN3, COL7A1, VWA1, ANXA2, ANGPTL4	400	258	20581	1.19657	1	0.919935	99.9987
Annotation Cluster 38	Enrichment Score: 0.4048054495615743
Category	Term	Count	%	PValue	Genes	List Total	Pop Hits	Pop Total	Fold Enrichment	Bonferroni	Benjamini	FDR
UP_KEYWORDS	Transcription regulation	52	12.5604	0.196751	CCNT2, BMI1, ELF1, FOXK1, MORF4L2, ARNT2, TBX20, BBX, GLI3, SIN3B, ZNF682, MIER1, ACTR5, MIER3, NR2F2, INO80E, ZNF493, SS18L1, BRD8, ZNF43, BRF1, RARG, ZNF544, MBD3, NR0B1, HMGA2, DMRTB1, SUZ12, ZNF789, MNT, ZNF277, SUPT6H, DEAF1, CNBP, ZNF133, ERBB2, NR2C1, STAT6, NPAS2, ZNF429, BCL6, ZNF562, ESRRA, BRD3, ZNF160, ILF3, ZBTB43, PREB, PHF2, DLX5, TDG, TCEB1	400	2332	20581	1.14731	1	0.728342	94.9715
UP_KEYWORDS	Transcription	53	12.8019	0.20749	CCNT2, BMI1, ELF1, TMEM18, FOXK1, MORF4L2, ARNT2, TBX20, BBX, GLI3, SIN3B, ZNF682, MIER1, ACTR5, MIER3, NR2F2, INO80E, ZNF493, SS18L1, BRD8, ZNF43, BRF1, RARG, ZNF544, MBD3, NR0B1, HMGA2, DMRTB1, SUZ12, ZNF789, MNT, ZNF277, SUPT6H, DEAF1, CNBP, ZNF133, ERBB2, NR2C1, STAT6, NPAS2, ZNF429, BCL6, ZNF562, ESRRA, BRD3, ZNF160, ILF3, ZBTB43, PREB, PHF2, DLX5, TDG, TCEB1	400	2398	20581	1.13719	1	0.743295	95.8153
GOTERM_MF_DIRECT	GO:0003700~transcription factor activity, sequence-specific DNA binding	24	5.7971	0.330683	DEAF1, ZNF43, ELF1, CNBP, ESRRA, RARG, ZNF133, ZNF544, ARNT2, TBX20, DMRTB1, GLI3, NR2C1, STAT6, NPAS2, ZNF789, ZNF429, MNT, BCL6, GATAD1, NR2F2, ZNF493, SUPT6H, BRD8	364	961	16881	1.1582	1	0.996754	99.7438
GOTERM_BP_DIRECT	GO:0006351~transcription, DNA-templated	44	10.628	0.465457	CCNT2, BMI1, CNBP, TMEM18, FOXK1, ZNF133, ERBB2, MORF4L2, ARNT2, BBX, NR2C1, STAT6, NPAS2, SIN3B, ZNF682, MIER1, ZNF429, ACTR5, MIER3, BCL6, NR2F2, INO80E, ZNF562, ZNF493, SS18L1, BRD8, ZNF43, ESRRA, RARG, BRD3, ZNF544, ZNF160, ILF3, MBD3, NR0B1, DMRTB1, ZBTB43, PREB, SUZ12, PHF2, ZNF789, TDG, ZNF277, SUPT6H	363	1955	16792	1.04112	1	0.999932	99.9978
UP_KEYWORDS	DNA-binding	41	9.90338	0.507659	DEAF1, ELF1, CNBP, TMEM18, FOXK1, ZNF133, TBX20, ARNT2, BBX, GLI3, NR2C1, RPA1, STAT6, NPAS2, MCM8, ZNF682, ZNF429, BCL6, NR2F2, ZNF562, ZNF493, ZNF43, ESRRA, RARG, ZNF544, ZNF160, ILF3, MBD3, HMGA2, DMRTB1, MCM4, ZBTB43, RBBP8, HIST2H3D, PREB, NUCB1, ZNF789, DLX5, ZNF277, MNT, EP400	400	2050	20581	1.02905	1	0.900365	99.9937
GOTERM_BP_DIRECT	GO:0006355~regulation of transcription, DNA-templated	32	7.72947	0.631659	CNBP, ZNF133, MORF4L2, ARNT2, BBX, NR2C1, SIN3B, ZNF682, ZNF429, ACTR5, MIER3, GATAD1, INO80E, ZNF562, ZNF493, BRD8, ZNF43, PPP2R1A, ESRRA, BRF1, ZNF544, ZNF160, NR0B1, HMGA2, DMRTB1, ZBTB43, PREB, SUZ12, ZNF789, ZNF277, ENG, SUPT6H	363	1504	16792	0.984233	1	0.999996	100
GOTERM_MF_DIRECT	GO:0003677~DNA binding	34	8.21256	0.72795	DEAF1, CNBP, TMEM18, ZNF133, ARNT2, BBX, NR2C1, RPA1, STAT6, NPAS2, MCM8, MIER1, ZNF429, MIER3, NR2F2, ZNF493, ZNF43, ZDHHC1, ESRRA, RARG, ZNF544, LIG1, ZNF160, ILF3, MBD3, NR0B1, HMGA2, MCM4, ZBTB43, PREB, NUCB1, ZNF789, EP400, SUPT6H	364	1674	16881	0.941934	1	0.999926	100
Annotation Cluster 39	Enrichment Score: 0.39205361123057186
Category	Term	Count	%	PValue	Genes	List Total	Pop Hits	Pop Total	Fold Enrichment	Bonferroni	Benjamini	FDR
UP_SEQ_FEATURE	transit peptide:Mitochondrion	12	2.89855	0.366746	PDPR, COQ3, BCKDK, PDP2, ADHFE1, STARD7, NDUFV1, KIAA0141, ALDH4A1, SIRT5, HIBADH, SCO1	401	482	20063	1.24562	1	0.99999	99.9417
GOTERM_CC_DIRECT	GO:0005759~mitochondrial matrix	9	2.17391	0.370638	PDPR, COQ3, BCKDK, PDP2, ADHFE1, ALDH4A1, SIRT5, BCL2L1, HIBADH	380	327	18224	1.31994	1	0.946202	99.8376
UP_KEYWORDS	Mitochondrion	24	5.7971	0.420492	SEPT4, USP30, PDPR, BCKDK, PDP2, ADHFE1, TIMM17B, MAOB, KIAA0141, SFXN3, SIRT5, SYNJ2BP, BCL2L1, HIBADH, SLC11A2, COQ3, ACOT7, STARD7, BCL2, NDUFV1, ALDH4A1, SLC25A15, HIGD1A, SCO1	400	1119	20581	1.10354	1	0.86211	99.9416
UP_KEYWORDS	Transit peptide	12	2.89855	0.472838	PDPR, COQ3, BCKDK, PDP2, ADHFE1, STARD7, NDUFV1, KIAA0141, ALDH4A1, SIRT5, HIBADH, SCO1	400	536	20581	1.15192	1	0.890174	99.984
Annotation Cluster 40	Enrichment Score: 0.38575248891097297
Category	Term	Count	%	PValue	Genes	List Total	Pop Hits	Pop Total	Fold Enrichment	Bonferroni	Benjamini	FDR
GOTERM_MF_DIRECT	GO:0016491~oxidoreductase activity	7	1.69082	0.260707	PDPR, ADHFE1, AOX1, MAOB, ALDH4A1, MICAL1, CRYZL1	364	200	16881	1.62317	1	0.995572	98.8769
UP_KEYWORDS	Flavoprotein	4	0.966184	0.42238	NDUFV1, AOX1, MAOB, MICAL1	400	122	20581	1.68697	1	0.860876	99.9442
UP_KEYWORDS	FAD	3	0.724638	0.632247	AOX1, MAOB, MICAL1	400	110	20581	1.40325	1	0.935367	99.9999
Annotation Cluster 41	Enrichment Score: 0.38357189581675843
Category	Term	Count	%	PValue	Genes	List Total	Pop Hits	Pop Total	Fold Enrichment	Bonferroni	Benjamini	FDR
BIOCARTA	h_badPathway:Regulation of BAD phosphorylation	3	0.724638	0.160477	BCL2, BCL2L1, PIK3R1	46	26	1625	4.07609	1	0.983314	86.4499
GOTERM_BP_DIRECT	GO:0008630~intrinsic apoptotic signaling pathway in response to DNA damage	3	0.724638	0.269139	BCL2, BCL2L1, PIK3R1	363	47	16792	2.9527	1	0.9991	99.5362
BIOCARTA	h_il2rbPathway:IL-2 Receptor Beta Chain in T cell Activation	3	0.724638	0.294256	BCL2, BCL2L1, PIK3R1	46	39	1625	2.71739	1	0.998882	98.1356
KEGG_PATHWAY	hsa04210:Apoptosis	3	0.724638	0.413382	BCL2, BCL2L1, PIK3R1	158	62	6910	2.11617	1	0.921501	99.8923
KEGG_PATHWAY	hsa05222:Small cell lung cancer	3	0.724638	0.579658	BCL2, BCL2L1, PIK3R1	158	85	6910	1.54356	1	0.961366	99.9985
KEGG_PATHWAY	hsa05145:Toxoplasmosis	3	0.724638	0.754053	BCL2, BCL2L1, PIK3R1	158	118	6910	1.11189	1	0.985395	100
KEGG_PATHWAY	hsa04151:PI3K-Akt signaling pathway	6	1.44928	0.899409	CSH1, PPP2R1A, PPP2R5A, BCL2, BCL2L1, PIK3R1	158	345	6910	0.760594	1	0.997631	100
Annotation Cluster 42	Enrichment Score: 0.3201030396835697
Category	Term	Count	%	PValue	Genes	List Total	Pop Hits	Pop Total	Fold Enrichment	Bonferroni	Benjamini	FDR
INTERPRO	IPR005225:Small GTP-binding protein domain	6	1.44928	0.264587	RAB8B, RAB5C, EIF5B, RRAD, RAB15, NKIRAS2	385	167	18559	1.73192	1	0.999908	99.1373
GOTERM_BP_DIRECT	GO:0007264~small GTPase mediated signal transduction	8	1.93237	0.281817	RAB8B, RALGPS1, RAB5C, RRAD, RAB15, DOCK8, ITSN1, NKIRAS2	363	246	16792	1.50436	1	0.99909	99.6563
INTERPRO	IPR001806:Small GTPase superfamily	5	1.20773	0.324591	RAB8B, RAB5C, RRAD, RAB15, NKIRAS2	385	139	18559	1.734	1	0.999969	99.7687
GOTERM_MF_DIRECT	GO:0003924~GTPase activity	7	1.69082	0.38311	SEPT4, RAB8B, RAB5C, EIF5B, RRAD, TUBA4A, NKIRAS2	364	234	16881	1.38733	1	0.996733	99.9238
UP_SEQ_FEATURE	nucleotide phosphate-binding region:GTP	8	1.93237	0.422826	SEPT4, RAB8B, RAB5C, EIF5B, RRAD, RAB15, TUBA4A, NKIRAS2	401	310	20063	1.29116	1	0.999994	99.9871
UP_KEYWORDS	GTP-binding	8	1.93237	0.509603	SEPT4, RAB8B, RAB5C, EIF5B, RRAD, RAB15, TUBA4A, NKIRAS2	400	343	20581	1.20006	1	0.899484	99.994
UP_SEQ_FEATURE	short sequence motif:Effector region	3	0.724638	0.601103	RAB8B, RAB5C, NKIRAS2	401	101	20063	1.48611	1	1	100
UP_SEQ_FEATURE	lipid moiety-binding region:S-geranylgeranyl cysteine	3	0.724638	0.637554	RAB8B, RAB5C, RAB15	401	108	20063	1.38979	1	1	100
INTERPRO	IPR027417:P-loop containing nucleoside triphosphate hydrolase	18	4.34783	0.647915	NLRP7, SEPT4, DYNC1LI2, ABCB9, RAB8B, MYO1C, RAB5C, EIF5B, RRAD, MCM4, MCM8, KATNA1, DDX24, UCKL1, RAB15, EP400, NKIRAS2, DDX51	385	879	18559	0.987137	1	1	100
GOTERM_MF_DIRECT	GO:0005525~GTP binding	8	1.93237	0.722797	SEPT4, RAB8B, RAB5C, EIF5B, RRAD, RAB15, TUBA4A, NKIRAS2	364	384	16881	0.966174	1	0.999924	100
UP_KEYWORDS	Prenylation	3	0.724638	0.839995	RAB8B, RAB5C, RAB15	400	168	20581	0.918795	1	0.986044	100
Annotation Cluster 43	Enrichment Score: 0.29197935492755206
Category	Term	Count	%	PValue	Genes	List Total	Pop Hits	Pop Total	Fold Enrichment	Bonferroni	Benjamini	FDR
UP_SEQ_FEATURE	domain:Tyrosine-protein phosphatase	3	0.724638	0.358578	PTPN5, PTPN23, DUSP11	401	63	20063	2.3825	1	0.999993	99.9282
INTERPRO	IPR016130:Protein-tyrosine phosphatase, active site	3	0.724638	0.468466	PTPN5, PTPN23, DUSP11	385	76	18559	1.90284	1	0.999998	99.9943
INTERPRO	IPR000387:Protein-tyrosine/Dual specificity phosphatase	3	0.724638	0.508447	PTPN5, PTPN23, DUSP11	385	82	18559	1.7636	1	1	99.9983
UP_SEQ_FEATURE	active site:Phosphocysteine intermediate	3	0.724638	0.513962	PTPN5, PTPN23, DUSP11	401	86	20063	1.74532	1	0.999999	99.9992
GOTERM_BP_DIRECT	GO:0035335~peptidyl-tyrosine dephosphorylation	3	0.724638	0.633069	PTPN5, PTPN23, DUSP11	363	99	16792	1.40179	1	0.999996	100
GOTERM_MF_DIRECT	GO:0004725~protein tyrosine phosphatase activity	3	0.724638	0.637139	PTPN5, PTPN23, DUSP11	364	100	16881	1.39129	1	0.999715	100
Annotation Cluster 44	Enrichment Score: 0.2852011620317053
Category	Term	Count	%	PValue	Genes	List Total	Pop Hits	Pop Total	Fold Enrichment	Bonferroni	Benjamini	FDR
UP_KEYWORDS	Calcium channel	3	0.724638	0.367027	CACNA1H, TRPV6, ITPR3	400	66	20581	2.33875	1	0.820032	99.8053
INTERPRO	IPR005821:Ion transport domain	4	0.966184	0.376137	CACNA1H, TRPV6, ITPR3, KCNG4	385	106	18559	1.81906	1	0.999989	99.9322
UP_KEYWORDS	Calcium transport	3	0.724638	0.569332	CACNA1H, TRPV6, ITPR3	400	98	20581	1.57508	1	0.918362	99.999
UP_KEYWORDS	Ion channel	5	1.20773	0.919995	LRRC8A, CACNA1H, TRPV6, ITPR3, KCNG4	400	359	20581	0.716609	1	0.995386	100
Annotation Cluster 45	Enrichment Score: 0.2711082270465594
Category	Term	Count	%	PValue	Genes	List Total	Pop Hits	Pop Total	Fold Enrichment	Bonferroni	Benjamini	FDR
GOTERM_MF_DIRECT	GO:0004386~helicase activity	4	0.966184	0.276182	MCM8, DDX24, EP400, DDX51	364	85	16881	2.18242	1	0.995855	99.1799
UP_KEYWORDS	Helicase	5	1.20773	0.30121	MCM8, DDX24, MCM4, EP400, DDX51	400	143	20581	1.79904	1	0.790951	99.2489
UP_SEQ_FEATURE	domain:Helicase C-terminal	3	0.724638	0.637554	DDX24, EP400, DDX51	401	108	20063	1.38979	1	1	100
SMART	SM00490:HELICc	3	0.724638	0.655804	DDX24, EP400, DDX51	210	107	10057	1.34272	1	0.999993	99.9998
INTERPRO	IPR001650:Helicase, C-terminal	3	0.724638	0.657726	DDX24, EP400, DDX51	385	108	18559	1.33903	1	1	100
SMART	SM00487:DEXDc	3	0.724638	0.665769	DDX24, EP400, DDX51	210	109	10057	1.31809	1	0.99999	99.9999
UP_SEQ_FEATURE	domain:Helicase ATP-binding	3	0.724638	0.666677	DDX24, EP400, DDX51	401	114	20063	1.31664	1	1	100
INTERPRO	IPR014001:Helicase, superfamily 1/2, ATP-binding domain	3	0.724638	0.667566	DDX24, EP400, DDX51	385	110	18559	1.31469	1	1	100
Annotation Cluster 46	Enrichment Score: 0.2616337898160117
Category	Term	Count	%	PValue	Genes	List Total	Pop Hits	Pop Total	Fold Enrichment	Bonferroni	Benjamini	FDR
UP_SEQ_FEATURE	domain:Helix-loop-helix motif	4	0.966184	0.403033	NPAS2, ARNT2, MNT, PDCD6	401	115	20063	1.74026	1	0.999995	99.9777
GOTERM_MF_DIRECT	GO:0046983~protein dimerization activity	5	1.20773	0.4039	NPAS2, HPSE, ERBB2, MNT, PDCD6	364	150	16881	1.54588	1	0.996654	99.9542
UP_SEQ_FEATURE	DNA-binding region:Basic motif	4	0.966184	0.634	NPAS2, ARNT2, MNT, PDCD6	401	163	20063	1.22779	1	1	100
SMART	SM00353:HLH	3	0.724638	0.685004	NPAS2, ARNT2, MNT	210	113	10057	1.27143	1	0.99999	99.9999
INTERPRO	IPR011598:Myc-type, basic helix-loop-helix (bHLH) domain	3	0.724638	0.695719	NPAS2, ARNT2, MNT	385	116	18559	1.24669	1	1	100
Annotation Cluster 47	Enrichment Score: 0.2588591843385987
Category	Term	Count	%	PValue	Genes	List Total	Pop Hits	Pop Total	Fold Enrichment	Bonferroni	Benjamini	FDR
UP_SEQ_FEATURE	zinc finger region:C2H2-type 18	4	0.966184	0.14003	ZNF43, ZNF429, ZNF160, ZNF493	401	65	20063	3.07892	1	0.998737	91.4494
UP_SEQ_FEATURE	zinc finger region:C2H2-type 20	3	0.724638	0.160882	ZNF43, ZNF160, ZNF493	401	36	20063	4.16937	1	0.999448	94.269
UP_SEQ_FEATURE	zinc finger region:C2H2-type 3; degenerate	3	0.724638	0.196727	ZNF43, ZNF429, ZNF562	401	41	20063	3.66091	1	0.999743	97.1871
UP_SEQ_FEATURE	zinc finger region:C2H2-type 17	4	0.966184	0.224505	ZNF43, ZNF429, ZNF160, ZNF493	401	82	20063	2.44061	1	0.999852	98.4151
UP_SEQ_FEATURE	zinc finger region:C2H2-type 19	3	0.724638	0.292698	ZNF43, ZNF160, ZNF493	401	54	20063	2.77958	1	0.999948	99.6465
UP_SEQ_FEATURE	zinc finger region:C2H2-type 16	4	0.966184	0.33797	ZNF43, ZNF429, ZNF160, ZNF493	401	103	20063	1.94301	1	0.999987	99.8797
UP_SEQ_FEATURE	zinc finger region:C2H2-type 14	5	1.20773	0.377763	ZNF43, ZNF133, ZNF429, ZNF160, ZNF493	401	156	20063	1.6036	1	0.999992	99.9562
UP_SEQ_FEATURE	zinc finger region:C2H2-type 13	6	1.44928	0.386706	ZNF43, ZNF133, ZNF429, ZNF544, ZNF160, ZNF493	401	204	20063	1.47154	1	0.999993	99.9654
UP_SEQ_FEATURE	zinc finger region:C2H2-type 15	4	0.966184	0.496611	ZNF43, ZNF429, ZNF160, ZNF493	401	133	20063	1.50473	1	0.999999	99.9986
UP_SEQ_FEATURE	domain:KRAB	8	1.93237	0.528412	ZNF43, ZNF789, ZNF682, ZNF133, ZNF429, ZNF544, ZNF160, ZNF562	401	343	20063	1.16694	1	0.999999	99.9995
SMART	SM00349:KRAB	9	2.17391	0.572031	ZNF43, ZNF789, ZNF682, ZNF133, ZNF429, ZNF544, ZNF160, ZNF562, ZNF493	210	392	10057	1.09953	1	0.999977	99.9974
UP_SEQ_FEATURE	zinc finger region:C2H2-type 12	6	1.44928	0.580667	ZNF43, ZNF133, ZNF429, ZNF544, ZNF160, ZNF493	401	256	20063	1.17263	1	1	99.9999
INTERPRO	IPR001909:Krueppel-associated box	9	2.17391	0.594196	ZNF43, ZNF789, ZNF682, ZNF133, ZNF429, ZNF544, ZNF160, ZNF562, ZNF493	385	402	18559	1.07922	1	1	99.9999
UP_SEQ_FEATURE	zinc finger region:C2H2-type 5	11	2.657	0.660878	ZNF43, ZNF789, ZNF682, ZNF133, ZNF429, ZNF544, ZNF160, BCL6, GLI3, ZNF562, ZNF493	401	550	20063	1.00065	1	1	100
UP_SEQ_FEATURE	zinc finger region:C2H2-type 2	12	2.89855	0.685376	ZNF789, ZNF682, ZNF133, ZNF429, ZNF544, ZNF160, ZNF277, BCL6, GLI3, ZNF562, ZBTB43, ZNF493	401	615	20063	0.976242	1	1	100
UP_SEQ_FEATURE	zinc finger region:C2H2-type 11	6	1.44928	0.719803	ZNF43, ZNF133, ZNF429, ZNF544, ZNF160, ZNF493	401	301	20063	0.997324	1	1	100
UP_SEQ_FEATURE	zinc finger region:C2H2-type 8	8	1.93237	0.750773	ZNF43, ZNF789, ZNF682, ZNF133, ZNF429, ZNF544, ZNF160, ZNF562	401	427	20063	0.937376	1	1	100
UP_SEQ_FEATURE	zinc finger region:C2H2-type 9	7	1.69082	0.782664	ZNF43, ZNF682, ZNF133, ZNF429, ZNF544, ZNF160, ZNF493	401	385	20063	0.90968	1	1	100
UP_SEQ_FEATURE	zinc finger region:C2H2-type 6	9	2.17391	0.784866	ZNF43, ZNF789, ZNF682, ZNF133, ZNF429, ZNF544, ZNF160, BCL6, ZNF562	401	501	20063	0.898786	1	1	100
UP_SEQ_FEATURE	zinc finger region:C2H2-type 10	6	1.44928	0.812986	ZNF43, ZNF682, ZNF133, ZNF544, ZNF160, ZNF493	401	341	20063	0.880336	1	1	100
UP_SEQ_FEATURE	zinc finger region:C2H2-type 7	8	1.93237	0.81934	ZNF43, ZNF789, ZNF682, ZNF133, ZNF429, ZNF544, ZNF160, ZNF562	401	463	20063	0.864491	1	1	100
INTERPRO	IPR007087:Zinc finger, C2H2	14	3.38164	0.848147	ZNF43, ZNF789, ZNF682, ZNF133, ZNF429, ZNF544, ZNF160, ZNF277, BCL6, YOD1, ZNF562, GLI3, ZBTB43, ZNF493	385	799	18559	0.844647	1	1	100
INTERPRO	IPR015880:Zinc finger, C2H2-like	13	3.1401	0.868894	ZNF43, ZNF789, ZNF682, ZNF133, ZNF429, ZNF544, ZNF160, ZNF277, BCL6, ZNF562, GLI3, ZBTB43, ZNF493	385	762	18559	0.822398	1	1	100
INTERPRO	IPR013087:Zinc finger C2H2-type/integrase DNA-binding domain	12	2.89855	0.875366	ZNF43, ZNF789, ZNF682, ZNF133, ZNF429, ZNF544, ZNF160, BCL6, GLI3, ZNF562, ZBTB43, ZNF493	385	712	18559	0.812447	1	1	100
SMART	SM00355:ZnF_C2H2	13	3.1401	0.877019	ZNF43, ZNF789, ZNF682, ZNF133, ZNF429, ZNF544, ZNF160, ZNF277, BCL6, ZNF562, GLI3, ZBTB43, ZNF493	210	762	10057	0.817029	1	1	100
UP_SEQ_FEATURE	zinc finger region:C2H2-type 4	9	2.17391	0.903371	ZNF789, ZNF682, ZNF133, ZNF429, ZNF544, ZNF160, BCL6, GLI3, ZNF562	401	588	20063	0.765802	1	1	100
GOTERM_MF_DIRECT	GO:0003676~nucleic acid binding	17	4.10628	0.90519	ZNF43, CNBP, ZCCHC11, ZNF133, ZNF544, ZNF160, GLI3, ZNF789, ZNF682, ZNF429, DDX24, ZNF277, BCL6, ZNF562, CPSF1, ZNF493, DDX51	364	985	16881	0.800404	1	1	100
UP_SEQ_FEATURE	zinc finger region:C2H2-type 1	8	1.93237	0.928031	ZNF43, ZNF789, ZNF682, ZNF133, ZNF160, ZNF277, BCL6, GLI3	401	554	20063	0.72249	1	1	100
UP_SEQ_FEATURE	zinc finger region:C2H2-type 3	8	1.93237	0.971864	ZNF789, ZNF682, ZNF133, ZNF544, ZNF160, BCL6, GLI3, ZNF493	401	636	20063	0.629339	1	1	100
Annotation Cluster 48	Enrichment Score: 0.24866836358580977
Category	Term	Count	%	PValue	Genes	List Total	Pop Hits	Pop Total	Fold Enrichment	Bonferroni	Benjamini	FDR
INTERPRO	IPR011333:BTB/POZ fold	6	1.44928	0.357069	KCTD17, BCL6, TCEB1, KCNG4, ZBTB43, KLHL20	385	190	18559	1.52227	1	0.999983	99.892
UP_SEQ_FEATURE	domain:BTB	4	0.966184	0.550058	KCTD17, BCL6, ZBTB43, KLHL20	401	144	20063	1.38979	1	1	99.9998
SMART	SM00225:BTB	4	0.966184	0.712824	KCTD17, BCL6, ZBTB43, KLHL20	210	176	10057	1.08842	1	0.999992	100
INTERPRO	IPR000210:BTB/POZ-like	4	0.966184	0.723075	KCTD17, BCL6, ZBTB43, KLHL20	385	180	18559	1.07123	1	1	100
Annotation Cluster 49	Enrichment Score: 0.24619395225129745
Category	Term	Count	%	PValue	Genes	List Total	Pop Hits	Pop Total	Fold Enrichment	Bonferroni	Benjamini	FDR
UP_SEQ_FEATURE	repeat:1	7	1.69082	0.405084	BRF1, PTPN23, GFRA1, KRTAP10-5, NDRG1, NR0B1, FLVCR2	401	257	20063	1.36275	1	0.999995	99.9789
UP_SEQ_FEATURE	repeat:2	7	1.69082	0.418347	BRF1, PTPN23, GFRA1, KRTAP10-5, NDRG1, NR0B1, FLVCR2	401	260	20063	1.34703	1	0.999995	99.9854
UP_SEQ_FEATURE	repeat:3	6	1.44928	0.462639	PTPN23, GFRA1, KRTAP10-5, NDRG1, NR0B1, FLVCR2	401	225	20063	1.3342	1	0.999996	99.996
UP_SEQ_FEATURE	repeat:5	3	0.724638	0.834098	PTPN23, KRTAP10-5, FLVCR2	401	161	20063	0.932281	1	1	100
UP_SEQ_FEATURE	repeat:4	3	0.724638	0.898442	PTPN23, KRTAP10-5, FLVCR2	401	192	20063	0.781757	1	1	100
Annotation Cluster 50	Enrichment Score: 0.23318276866696017
Category	Term	Count	%	PValue	Genes	List Total	Pop Hits	Pop Total	Fold Enrichment	Bonferroni	Benjamini	FDR
GOTERM_BP_DIRECT	GO:0051301~cell division	10	2.41546	0.339931	CCNT2, SEPT4, LIG1, KATNA1, CCNY, ANXA11, CDC123, CETN2, HMGA2, RBBP8	363	350	16792	1.32168	1	0.999579	99.9191
UP_KEYWORDS	Cell division	10	2.41546	0.346963	CCNT2, SEPT4, LIG1, KATNA1, CCNY, ANXA11, CDC123, CETN2, HMGA2, RBBP8	400	388	20581	1.3261	1	0.8083	99.7019
UP_KEYWORDS	Cell cycle	13	3.1401	0.609639	CCNT2, SEPT4, SPAG8, MCM8, LIG1, KATNA1, CCNY, ANXA11, CDC123, CETN2, HMGA2, MCM4, RBBP8	400	650	20581	1.02905	1	0.928532	99.9997
GOTERM_BP_DIRECT	GO:0007049~cell cycle	5	1.20773	0.691474	CCNT2, SEPT4, SPAG8, ANXA11, CDC123	363	217	16792	1.06587	1	0.999999	100
UP_KEYWORDS	Mitosis	4	0.966184	0.885844	KATNA1, CETN2, HMGA2, RBBP8	400	262	20581	0.785534	1	0.992017	100
GOTERM_BP_DIRECT	GO:0007067~mitotic nuclear division	4	0.966184	0.905781	KATNA1, CETN2, HMGA2, RBBP8	363	248	16792	0.746112	1	1	100
Annotation Cluster 51	Enrichment Score: 0.18753645262273755
Category	Term	Count	%	PValue	Genes	List Total	Pop Hits	Pop Total	Fold Enrichment	Bonferroni	Benjamini	FDR
INTERPRO	IPR011047:Quinonprotein alcohol dehydrogenase-like superfamily	3	0.724638	0.26167	WSB1, PREB, WDR86	385	48	18559	3.01282	1	0.999926	99.0828
INTERPRO	IPR020472:G-protein beta WD-40 repeat	3	0.724638	0.576459	WSB1, FBXW7, WDR86	385	93	18559	1.55501	1	1	99.9998
INTERPRO	IPR017986:WD40-repeat-containing domain	7	1.69082	0.609742	WSB1, PREB, SPAG9, WDR54, FBXW7, WDR86, DYNC1I2	385	306	18559	1.10273	1	1	100
UP_SEQ_FEATURE	repeat:WD 3	6	1.44928	0.624456	WSB1, PREB, WDR54, FBXW7, WDR86, DYNC1I2	401	269	20063	1.11596	1	1	100
UP_KEYWORDS	WD repeat	6	1.44928	0.638081	WSB1, PREB, WDR54, FBXW7, WDR86, DYNC1I2	400	281	20581	1.09863	1	0.936766	99.9999
UP_SEQ_FEATURE	repeat:WD 2	6	1.44928	0.653117	WSB1, PREB, WDR54, FBXW7, WDR86, DYNC1I2	401	278	20063	1.07984	1	1	100
UP_SEQ_FEATURE	repeat:WD 1	6	1.44928	0.653117	WSB1, PREB, WDR54, FBXW7, WDR86, DYNC1I2	401	278	20063	1.07984	1	1	100
INTERPRO	IPR001680:WD40 repeat	6	1.44928	0.65368	WSB1, PREB, WDR54, FBXW7, WDR86, DYNC1I2	385	268	18559	1.07922	1	1	100
SMART	SM00320:WD40	6	1.44928	0.65571	WSB1, PREB, WDR54, FBXW7, WDR86, DYNC1I2	210	267	10057	1.07619	1	0.999997	99.9998
INTERPRO	IPR015943:WD40/YVTN repeat-like-containing domain	7	1.69082	0.684331	WSB1, PREB, SPAG9, WDR54, FBXW7, WDR86, DYNC1I2	385	331	18559	1.01945	1	1	100
UP_SEQ_FEATURE	repeat:WD 4	5	1.20773	0.751211	WSB1, WDR54, FBXW7, WDR86, DYNC1I2	401	255	20063	0.981028	1	1	100
UP_SEQ_FEATURE	repeat:WD 6	4	0.966184	0.752427	WSB1, FBXW7, WDR86, DYNC1I2	401	196	20063	1.02107	1	1	100
UP_SEQ_FEATURE	repeat:WD 7	3	0.724638	0.806527	FBXW7, WDR86, DYNC1I2	401	151	20063	0.994022	1	1	100
UP_SEQ_FEATURE	repeat:WD 5	4	0.966184	0.854497	WSB1, FBXW7, WDR86, DYNC1I2	401	237	20063	0.844429	1	1	100
INTERPRO	IPR019775:WD40 repeat, conserved site	3	0.724638	0.861044	WSB1, FBXW7, WDR86	385	166	18559	0.871178	1	1	100
Annotation Cluster 52	Enrichment Score: 0.16251715286937685
Category	Term	Count	%	PValue	Genes	List Total	Pop Hits	Pop Total	Fold Enrichment	Bonferroni	Benjamini	FDR
GOTERM_BP_DIRECT	GO:0006468~protein phosphorylation	13	3.1401	0.27394	CCNT2, PRKCZ, BCKDK, PAN3, CLK2, ERBB2, LCK, MKNK1, ILF3, TSSK1B, RIOK1, PIK3R1, AATK	363	456	16792	1.31879	1	0.999088	99.5857
UP_KEYWORDS	Kinase	17	4.10628	0.360385	PRKCZ, CHKA, BCKDK, PDXK, ERBB2, MKNK1, RIOK1, CLK2, LCK, DGKZ, UCKL1, CDK2AP2, TSSK1B, CERK, PIK3R1, CALM1, AATK	400	735	20581	1.19006	1	0.819689	99.7755
GOTERM_MF_DIRECT	GO:0004713~protein tyrosine kinase activity	4	0.966184	0.547692	CLK2, ERBB2, LCK, ERLIN2	364	133	16881	1.39478	1	0.999269	99.9992
UP_SEQ_FEATURE	active site:Proton acceptor	14	3.38164	0.583905	ALDOA, PRKCZ, ERBB2, MKNK1, SIRT5, RIOK1, CLK2, LCK, HSD11B2, ALDH4A1, MPO, TSSK1B, NSDHL, AATK	401	672	20063	1.04234	1	1	99.9999
INTERPRO	IPR008266:Tyrosine-protein kinase, active site	3	0.724638	0.588064	ERBB2, LCK, AATK	385	95	18559	1.52227	1	1	99.9999
UP_KEYWORDS	Tyrosine-protein kinase	3	0.724638	0.642007	CLK2, ERBB2, LCK	400	112	20581	1.37819	1	0.937259	99.9999
UP_SEQ_FEATURE	binding site:ATP	11	2.657	0.678346	CHKA, PRKCZ, CLK2, LIG1, ERBB2, LCK, MKNK1, EPRS, TSSK1B, RIOK1, AATK	401	558	20063	0.986302	1	1	100
GOTERM_MF_DIRECT	GO:0004674~protein serine/threonine kinase activity	8	1.93237	0.702446	CCNT2, PRKCZ, BCKDK, CLK2, MKNK1, TSSK1B, RIOK1, AATK	364	376	16881	0.986731	1	0.999896	100
UP_SEQ_FEATURE	domain:Protein kinase	9	2.17391	0.740189	PRKCZ, PAN3, CLK2, ERBB2, LCK, MKNK1, TSSK1B, RIOK1, AATK	401	478	20063	0.942033	1	1	100
INTERPRO	IPR011009:Protein kinase-like domain	10	2.41546	0.773475	CHKA, PRKCZ, PAN3, CLK2, ERBB2, LCK, MKNK1, TSSK1B, RIOK1, AATK	385	531	18559	0.907819	1	1	100
INTERPRO	IPR001245:Serine-threonine/tyrosine-protein kinase catalytic domain	3	0.724638	0.789184	ERBB2, LCK, AATK	385	140	18559	1.03297	1	1	100
INTERPRO	IPR017441:Protein kinase, ATP binding site	7	1.69082	0.803549	PRKCZ, CLK2, ERBB2, LCK, MKNK1, TSSK1B, AATK	385	381	18559	0.88566	1	1	100
INTERPRO	IPR000719:Protein kinase, catalytic domain	8	1.93237	0.880466	PRKCZ, PAN3, CLK2, ERBB2, LCK, MKNK1, TSSK1B, AATK	385	487	18559	0.791872	1	1	100
UP_KEYWORDS	Serine/threonine-protein kinase	6	1.44928	0.881184	PRKCZ, CLK2, MKNK1, TSSK1B, RIOK1, AATK	400	393	20581	0.785534	1	0.991798	100
GOTERM_MF_DIRECT	GO:0004672~protein kinase activity	6	1.44928	0.888387	PRKCZ, PAN3, CLK2, ERBB2, MKNK1, AATK	364	359	16881	0.775093	1	1	100
GOTERM_BP_DIRECT	GO:0046777~protein autophosphorylation	3	0.724638	0.88844	CLK2, ERBB2, MKNK1	363	172	16792	0.806842	1	1	100
INTERPRO	IPR008271:Serine/threonine-protein kinase, active site	4	0.966184	0.958237	PRKCZ, CLK2, MKNK1, TSSK1B	385	312	18559	0.618015	1	1	100
SMART	SM00220:S_TKc	4	0.966184	0.981523	PRKCZ, CLK2, MKNK1, TSSK1B	210	359	10057	0.533599	1	1	100
Annotation Cluster 53	Enrichment Score: 0.13155376658275775
Category	Term	Count	%	PValue	Genes	List Total	Pop Hits	Pop Total	Fold Enrichment	Bonferroni	Benjamini	FDR
UP_SEQ_FEATURE	active site:Charge relay system	5	1.20773	0.578762	MASP1, PAFAH2, LCAT, HTRA4, FURIN	401	203	20063	1.23233	1	1	99.9999
UP_KEYWORDS	Serine protease	3	0.724638	0.761421	MASP1, HTRA4, FURIN	400	141	20581	1.09473	1	0.968487	100
GOTERM_MF_DIRECT	GO:0004252~serine-type endopeptidase activity	4	0.966184	0.914563	MASP1, FCN3, HTRA4, FURIN	364	255	16881	0.727473	1	1	100
Annotation Cluster 54	Enrichment Score: 0.11474211910053515
Category	Term	Count	%	PValue	Genes	List Total	Pop Hits	Pop Total	Fold Enrichment	Bonferroni	Benjamini	FDR
UP_SEQ_FEATURE	domain:PDZ	3	0.724638	0.661957	ARHGAP21, HTRA4, SYNJ2BP	401	113	20063	1.32829	1	1	100
SMART	SM00228:PDZ	3	0.724638	0.82004	ARHGAP21, HTRA4, SYNJ2BP	210	149	10057	0.964238	1	0.999999	100
INTERPRO	IPR001478:PDZ domain	3	0.724638	0.83389	ARHGAP21, HTRA4, SYNJ2BP	385	155	18559	0.933004	1	1	100
Annotation Cluster 55	Enrichment Score: 0.10399145716816294
Category	Term	Count	%	PValue	Genes	List Total	Pop Hits	Pop Total	Fold Enrichment	Bonferroni	Benjamini	FDR
INTERPRO	IPR018097:EGF-like calcium-binding, conserved site	3	0.724638	0.626811	MASP1, LTBP3, CCBE1	385	102	18559	1.4178	1	1	100
INTERPRO	IPR001881:EGF-like calcium-binding	3	0.724638	0.742201	MASP1, LTBP3, CCBE1	385	127	18559	1.13871	1	1	100
SMART	SM00179:EGF_CA	3	0.724638	0.745291	MASP1, LTBP3, CCBE1	210	127	10057	1.13127	1	0.999995	100
INTERPRO	IPR013032:EGF-like, conserved site	3	0.724638	0.919932	MASP1, LTBP3, CCBE1	385	199	18559	0.726711	1	1	100
UP_KEYWORDS	EGF-like domain	3	0.724638	0.946898	MASP1, LTBP3, CCBE1	400	238	20581	0.648561	1	0.997841	100
Annotation Cluster 56	Enrichment Score: 0.09420954070974256
Category	Term	Count	%	PValue	Genes	List Total	Pop Hits	Pop Total	Fold Enrichment	Bonferroni	Benjamini	FDR
UP_KEYWORDS	Vision	3	0.724638	0.656264	GUCA1B, PDCL, PPT1	400	115	20581	1.34224	1	0.939937	100
GOTERM_BP_DIRECT	GO:0007601~visual perception	4	0.966184	0.811606	GUCA1B, PDCL, PPT1, RABGGTA	363	201	16792	0.920576	1	1	100
UP_KEYWORDS	Sensory transduction	7	1.69082	0.979371	GUCA1B, OR8G2, OR52K1, PDCL, PPT1, OR5AR1, OR2L13	400	609	20581	0.591408	1	0.999638	100
Annotation Cluster 57	Enrichment Score: 0.07557356408260274
Category	Term	Count	%	PValue	Genes	List Total	Pop Hits	Pop Total	Fold Enrichment	Bonferroni	Benjamini	FDR
UP_KEYWORDS	TPR repeat	3	0.724638	0.83756	KIAA0141, PTPN23, SGTA	400	167	20581	0.924296	1	0.985954	100
UP_SEQ_FEATURE	repeat:TPR 1	3	0.724638	0.84165	KIAA0141, PTPN23, SGTA	401	164	20063	0.915227	1	1	100
UP_SEQ_FEATURE	repeat:TPR 2	3	0.724638	0.84165	KIAA0141, PTPN23, SGTA	401	164	20063	0.915227	1	1	100
Annotation Cluster 58	Enrichment Score: 0.05761758155617766
Category	Term	Count	%	PValue	Genes	List Total	Pop Hits	Pop Total	Fold Enrichment	Bonferroni	Benjamini	FDR
UP_SEQ_FEATURE	repeat:ANK 5	3	0.724638	0.778308	PSMD10, PLA2G6, TRPV6	401	142	20063	1.05702	1	1	100
UP_SEQ_FEATURE	repeat:ANK 4	3	0.724638	0.855828	PSMD10, PLA2G6, TRPV6	401	170	20063	0.882925	1	1	100
UP_SEQ_FEATURE	repeat:ANK 1	4	0.966184	0.86768	PSMD10, DGKZ, PLA2G6, TRPV6	401	244	20063	0.820204	1	1	100
UP_SEQ_FEATURE	repeat:ANK 2	4	0.966184	0.869475	PSMD10, DGKZ, PLA2G6, TRPV6	401	245	20063	0.816856	1	1	100
UP_KEYWORDS	ANK repeat	4	0.966184	0.888888	PSMD10, DGKZ, PLA2G6, TRPV6	400	264	20581	0.779583	1	0.992244	100
SMART	SM00248:ANK	4	0.966184	0.894774	PSMD10, DGKZ, PLA2G6, TRPV6	210	249	10057	0.769325	1	1	100
INTERPRO	IPR002110:Ankyrin repeat	4	0.966184	0.900769	PSMD10, DGKZ, PLA2G6, TRPV6	385	255	18559	0.75616	1	1	100
INTERPRO	IPR020683:Ankyrin repeat-containing domain	4	0.966184	0.914365	PSMD10, DGKZ, PLA2G6, TRPV6	385	265	18559	0.727626	1	1	100
UP_SEQ_FEATURE	repeat:ANK 3	3	0.724638	0.920435	PSMD10, PLA2G6, TRPV6	401	207	20063	0.725108	1	1	100
Annotation Cluster 59	Enrichment Score: 0.05356608083451529
Category	Term	Count	%	PValue	Genes	List Total	Pop Hits	Pop Total	Fold Enrichment	Bonferroni	Benjamini	FDR
UP_SEQ_FEATURE	repeat:LRR 9	3	0.724638	0.750267	NLRP7, LRRC8A, LRRC32	401	134	20063	1.12013	1	1	100
INTERPRO	IPR001611:Leucine-rich repeat	5	1.20773	0.796581	NLRP7, LRRC8A, LRRC32, FBXL6, RABGGTA	385	263	18559	0.916449	1	1	100
UP_SEQ_FEATURE	repeat:LRR 8	3	0.724638	0.797495	NLRP7, LRRC8A, LRRC32	401	148	20063	1.01417	1	1	100
UP_KEYWORDS	Leucine-rich repeat	5	1.20773	0.855997	NLRP7, LRRC8A, LRRC32, FBXL6, RABGGTA	400	311	20581	0.827211	1	0.988405	100
UP_SEQ_FEATURE	repeat:LRR 7	3	0.724638	0.86884	NLRP7, LRRC8A, LRRC32	401	176	20063	0.852825	1	1	100
UP_SEQ_FEATURE	repeat:LRR 6	3	0.724638	0.923005	NLRP7, LRRC8A, LRRC32	401	209	20063	0.718169	1	1	100
UP_SEQ_FEATURE	repeat:LRR 3	4	0.966184	0.942038	NLRP7, LRRC8A, LRRC32, FBXL6	401	302	20063	0.662681	1	1	100
UP_SEQ_FEATURE	repeat:LRR 5	3	0.724638	0.946557	NLRP7, LRRC8A, LRRC32	401	231	20063	0.649772	1	1	100
UP_SEQ_FEATURE	repeat:LRR 1	4	0.966184	0.956335	NLRP7, LRRC8A, LRRC32, FBXL6	401	321	20063	0.623457	1	1	100
UP_SEQ_FEATURE	repeat:LRR 2	4	0.966184	0.956988	NLRP7, LRRC8A, LRRC32, FBXL6	401	322	20063	0.621521	1	1	100
UP_SEQ_FEATURE	repeat:LRR 4	3	0.724638	0.964387	NLRP7, LRRC8A, LRRC32	401	255	20063	0.588617	1	1	100
Annotation Cluster 60	Enrichment Score: 0.052891766284864764
Category	Term	Count	%	PValue	Genes	List Total	Pop Hits	Pop Total	Fold Enrichment	Bonferroni	Benjamini	FDR
UP_KEYWORDS	Secreted	37	8.9372	0.665784	CSH1, DEAF1, SERPINA10, MASP1, LTBP3, TNFSF14, PPT1, MIF, ASGR1, C5ORF46, COL7A1, FCN3, ST3GAL4, SMPDL3A, HPSE, LCAT, C1QTNF1, CCBE1, GPX3, HTRA4, GUCA2A, VWA1, FKRP, CRIM1, ANGPTL4, UCMA, HAPLN3, PSG2, SPINT1, INHA, AGER, ANXA2, LEP, NUCB1, CD59, PAPPA2, GPHA2	400	1965	20581	0.968826	1	0.941745	100
UP_KEYWORDS	Signal	74	17.8744	0.847733	CSH1, MASP1, ATP6AP2, VTCN1, LTBP3, HEXB, VPS37B, SHE, HIBADH, PIGK, ST3GAL4, TMEM59, HPSE, PLOD2, MIER1, SMPDL3A, LCAT, GPX3, CCBE1, RPN1, HTRA4, GUCA2A, VWA1, CCDC107, PCDHB9, UCMA, LTBR, TMEM167A, PSG2, ERLIN2, SPINT1, INHA, NUCB1, TMEM139, GAA, GPHA2, MFAP3, SERPINA10, EXOC7, CYP51A1, LRRC32, ERBB2, PPT1, SORCS3, C5ORF46, FBXW7, PROCR, COL7A1, FCN3, C1QTNF1, TSPAN32, SEC16A, SLC39A6, CRIM1, G…	400	4160	20581	0.915261	1	0.987195	100
UP_SEQ_FEATURE	signal peptide	60	14.4928	0.867856	CSH1, MASP1, ATP6AP2, VTCN1, LTBP3, HEXB, PIGK, TMEM59, HPSE, PLOD2, SMPDL3A, LCAT, GPX3, CCBE1, RPN1, HTRA4, GUCA2A, VWA1, CCDC107, PCDHB9, UCMA, LTBR, TMEM167A, PSG2, SPINT1, INHA, NUCB1, TMEM139, GAA, GPHA2, MFAP3, SERPINA10, LRRC32, ERBB2, PPT1, SORCS3, C5ORF46, PROCR, COL7A1, FCN3, C1QTNF1, SLC39A6, FKRP, CRIM1, GBA, ANGPTL4, FAM174B, ABCB9, HAPLN3, FURIN, AGER, LOC728138, LEP, LAMP1, CD59, …	401	3346	20063	0.897174	1	1	100
UP_SEQ_FEATURE	glycosylation site:N-linked (GlcNAc...)	74	17.8744	0.931814	MASP1, LRRC8A, VTCN1, LTBP3, ADCY6, HEXB, TNFSF14, ASGR1, CXCR5, ST3GAL4, SMPDL3A, TMEM59, HPSE, PLOD2, SLC23A2, LCAT, SLC2A1, CCBE1, RPN1, TRPV6, VWA1, PCDHB9, LTBR, TMEM167A, PGAP1, PSG2, ERLIN2, SPINT1, INHA, MGAT2, OR52K1, CCR4, GAA, GPHA2, MFAP3, OR5AR1, GALNT3, SERPINA10, LRRC32, ERBB2, PPT1, SLC19A3, OR2L13, TMEM159, SORCS3, SLC11A2, PROCR, COL7A1, FCN3, C1QTNF1, SLC39A6, FKRP, CRIM1, GBA,…	401	4234	20063	0.874445	1	1	100
UP_KEYWORDS	Glycoprotein	77	18.599	0.941494	IMPAD1, MASP1, LRRC8A, VTCN1, LTBP3, ADCY6, HEXB, TNFSF14, ASGR1, CXCR5, ST3GAL4, SMPDL3A, TMEM59, HPSE, PLOD2, SLC23A2, LCAT, SLC2A1, CCBE1, RPN1, TRPV6, VWA1, PCDHB9, LTBR, TMEM167A, PGAP1, PSG2, ERLIN2, SPINT1, INHA, JUP, NUCB1, MGAT2, OR52K1, CCR4, DPY19L2P2, GAA, GPHA2, MFAP3, OR5AR1, GALNT3, SERPINA10, LRRC32, ERBB2, PPT1, SLC19A3, OR2L13, TMEM159, SORCS3, SLC11A2, PROCR, COL7A1, FCN3, C1QT…	400	4551	20581	0.870543	1	0.99745	100
UP_SEQ_FEATURE	disulfide bond	42	10.1449	0.995774	CSH1, GALNT3, MASP1, LTBP3, VTCN1, ERBB2, HEXB, TNFSF14, PPT1, OR2L13, ASGR1, PIGK, PROCR, CXCR5, COL7A1, ST3GAL4, LCAT, CCBE1, GUCA2A, GBA, ANGPTL4, PLP1, LTBR, HAPLN3, OR8G2, PSG2, SPINT1, INHA, AGER, FURIN, LEP, LAMP1, OR52K1, CCR4, CD59, GAA, MPO, GFRA1, PAPPA2, MFAP3, GPHA2, OR5AR1	401	2917	20063	0.720385	1	1	100
UP_KEYWORDS	Disulfide bond	49	11.8357	0.996348	CSH1, GALNT3, MASP1, LTBP3, VTCN1, USP5, ERBB2, HEXB, TNFSF14, PPT1, OR2L13, ASGR1, PIGK, PROCR, CXCR5, COL7A1, FCN3, ST3GAL4, SMPDL3A, LCAT, CCBE1, COX19, GUCA2A, VWA1, FKRP, GBA, ANGPTL4, PLP1, LTBR, HAPLN3, OR8G2, PSG2, SPINT1, INHA, SLCO2B1, AGER, FURIN, LEP, LAMP1, OR52K1, CCR4, CD59, GAA, MPO, GFRA1, PAPPA2, GPHA2, MFAP3, OR5AR1	400	3434	20581	0.73418	1	0.999987	100
Annotation Cluster 61	Enrichment Score: 0.019402525489646046
Category	Term	Count	%	PValue	Genes	List Total	Pop Hits	Pop Total	Fold Enrichment	Bonferroni	Benjamini	FDR
UP_SEQ_FEATURE	domain:Ig-like V-type	3	0.724638	0.731235	HAPLN3, PSG2, AGER	401	129	20063	1.16354	1	1	100
INTERPRO	IPR003598:Immunoglobulin subtype 2	3	0.724638	0.967071	PSG2, MFAP3, AGER	385	250	18559	0.578462	1	1	100
SMART	SM00408:IGc2	3	0.724638	0.968378	PSG2, MFAP3, AGER	210	250	10057	0.574686	1	1	100
INTERPRO	IPR003599:Immunoglobulin subtype	5	1.20773	0.99264	HAPLN3, VTCN1, PSG2, MFAP3, AGER	385	497	18559	0.484962	1	1	100
SMART	SM00409:IG	5	1.20773	0.993346	HAPLN3, VTCN1, PSG2, MFAP3, AGER	210	497	10057	0.481796	1	1	100
UP_KEYWORDS	Immunoglobulin domain	5	1.20773	0.994129	HAPLN3, VTCN1, PSG2, MFAP3, AGER	400	546	20581	0.471177	1	0.999969	100
INTERPRO	IPR013783:Immunoglobulin-like fold	10	2.41546	0.998058	HAPLN3, COL7A1, CRLF3, VTCN1, PSG2, MFAP3, VWA1, MID1, FLNB, AGER	385	951	18559	0.50689	1	1	100
INTERPRO	IPR013106:Immunoglobulin V-set	3	0.724638	0.998518	HAPLN3, VTCN1, PSG2	385	417	18559	0.3468	1	1	100
INTERPRO	IPR007110:Immunoglobulin-like domain	5	1.20773	0.999931	HAPLN3, VTCN1, PSG2, MFAP3, AGER	385	771	18559	0.312615	1	1	100
Annotation Cluster 62	Enrichment Score: 0.002294384143266803
Category	Term	Count	%	PValue	Genes	List Total	Pop Hits	Pop Total	Fold Enrichment	Bonferroni	Benjamini	FDR
UP_KEYWORDS	Sensory transduction	7	1.69082	0.979371	GUCA1B, OR8G2, OR52K1, PDCL, PPT1, OR5AR1, OR2L13	400	609	20581	0.591408	1	0.999638	100
KEGG_PATHWAY	hsa04740:Olfactory transduction	5	1.20773	0.983102	OR8G2, OR52K1, OR5AR1, OR2L13, CALM1	158	399	6910	0.548047	1	0.999952	100
UP_KEYWORDS	Olfaction	4	0.966184	0.992242	OR8G2, OR52K1, OR5AR1, OR2L13	400	443	20581	0.464582	1	0.999948	100
INTERPRO	IPR000725:Olfactory receptor	4	0.966184	0.994022	OR8G2, OR52K1, OR5AR1, OR2L13	385	430	18559	0.44842	1	1	100
GOTERM_BP_DIRECT	GO:0050911~detection of chemical stimulus involved in sensory perception of smell	4	0.966184	0.995238	OR8G2, OR52K1, OR5AR1, OR2L13	363	425	16792	0.435378	1	1	100
GOTERM_MF_DIRECT	GO:0004984~olfactory receptor activity	4	0.966184	0.995641	OR8G2, OR52K1, OR5AR1, OR2L13	364	431	16881	0.430407	1	1	100
GOTERM_BP_DIRECT	GO:0007186~G-protein coupled receptor signaling pathway	9	2.17391	0.999148	CXCR5, CCR4, BAIAP3, OR8G2, OR52K1, ITPR3, OR5AR1, OR2L13, CALM1	363	899	16792	0.463104	1	1	100
INTERPRO	IPR000276:G protein-coupled receptor, rhodopsin-like	6	1.44928	0.999269	CXCR5, CCR4, OR8G2, OR52K1, OR5AR1, OR2L13	385	719	18559	0.402269	1	1	100
INTERPRO	IPR017452:GPCR, rhodopsin-like, 7TM	6	1.44928	0.999447	CXCR5, CCR4, OR8G2, OR52K1, OR5AR1, OR2L13	385	736	18559	0.392977	1	1	100
UP_KEYWORDS	G-protein coupled receptor	6	1.44928	0.999768	CXCR5, CCR4, OR8G2, OR52K1, OR5AR1, OR2L13	400	842	20581	0.366645	1	1	100
GOTERM_MF_DIRECT	GO:0004930~G-protein coupled receptor activity	5	1.20773	0.999878	CXCR5, OR8G2, OR52K1, OR5AR1, OR2L13	364	710	16881	0.326594	1	1	100
UP_KEYWORDS	Transducer	6	1.44928	0.999907	CXCR5, CCR4, OR8G2, OR52K1, OR5AR1, OR2L13	400	899	20581	0.343398	1	1	100

## Sheet: Gene methylation
Annotation Cluster 1	Enrichment Score: 5.330424793193928
Category	Term	Count	%	PValue	Genes	List Total	Pop Hits	Pop Total	Fold Enrichment	Bonferroni	Benjamini	FDR
INTERPRO	IPR001849:Pleckstrin homology domain	27	4.02985	2.18992e-06	RALGPS1, ASAP2, AKAP13, AFAP1L2, ASAP3, PLEKHG4, PLEKHG3, DGKD, COL4A3BP, PLEKHG5, GAB1, SNTB1, PHLDA3, AFAP1, IQSEC1, DAB2IP, BCR, OSBPL7, ARHGEF16, PSD3, MYO10, PLEKHH3, PLEKHA7, DOK7, SPTBN1, DNM1, PLEKHA2	634	271	18559	2.91649	0.00251743	0.00251743	0.00352195
INTERPRO	IPR011993:Pleckstrin homology-like domain	35	5.22388	4.49222e-06	RALGPS1, ASAP2, AKAP13, AFAP1L2, ASAP3, PLEKHG4, PLEKHG3, FRMD6, DGKD, COL4A3BP, GAB1, PLEKHG5, SNTB1, MSN, AFAP1, PHLDA3, IQSEC1, ARHGEF10L, CCM2, DAB2IP, BCR, OSBPL7, FRMPD2, ARHGEF16, PSD3, MYO10, PLEKHH3, PLEKHA7, DOK7, SPTBN1, CMIP, EPS8L2, DNM1, PLEKHA2, SNTG2	634	427	18559	2.39942	0.00515721	0.00258194	0.0072245
UP_SEQ_FEATURE	domain:PH	24	3.58209	5.83874e-06	DAB2IP, RALGPS1, BCR, OSBPL7, ASAP2, ARHGEF16, PSD3, AKAP13, ASAP3, PLEKHG4, PLEKHG3, PLEKHH3, DGKD, PLEKHA7, COL4A3BP, GAB1, DOK7, PLEKHG5, SPTBN1, CMIP, PHLDA3, DNM1, IQSEC1, SNTG2	655	245	20063	3.00054	0.0117077	0.00587109	0.0100481
SMART	SM00233:PH	27	4.02985	8.30027e-06	RALGPS1, ASAP2, AKAP13, AFAP1L2, ASAP3, PLEKHG4, PLEKHG3, DGKD, COL4A3BP, PLEKHG5, GAB1, SNTB1, PHLDA3, AFAP1, IQSEC1, DAB2IP, BCR, OSBPL7, ARHGEF16, PSD3, MYO10, PLEKHH3, PLEKHA7, DOK7, SPTBN1, DNM1, PLEKHA2	384	264	10057	2.67853	0.00223857	0.00223857	0.0109128
Annotation Cluster 2	Enrichment Score: 3.7263211583130293
Category	Term	Count	%	PValue	Genes	List Total	Pop Hits	Pop Total	Fold Enrichment	Bonferroni	Benjamini	FDR
GOTERM_MF_DIRECT	GO:0098641~cadherin binding involved in cell-cell adhesion	25	3.73134	8.94527e-05	ALDOA, LDHA, HSPA1B, SFN, CAPZB, SRC, AHNAK, EGFR, DAB2IP, STK24, BAIAP2L1, BAIAP2, ARHGEF16, LYPLA2, MPP7, RPL23A, CLIC1, FLNB, CORO1B, CRKL, CSNK1D, SPTBN1, EPS8L2, SEPT9, PARVA	592	290	16881	2.45821	0.074462	0.0254636	0.138629
GOTERM_CC_DIRECT	GO:0005913~cell-cell adherens junction	26	3.8806	0.000107934	ALDOA, LDHA, HSPA1B, SFN, CAPZB, SRC, DLG5, AHNAK, EGFR, DAB2IP, STK24, BAIAP2L1, BAIAP2, ARHGEF16, LYPLA2, MPP7, RPL23A, CLIC1, FLNB, CORO1B, CRKL, CSNK1D, SPTBN1, EPS8L2, PARVA, SEPT9	616	323	18224	2.38141	0.0446317	0.0151042	0.151664
GOTERM_BP_DIRECT	GO:0098609~cell-cell adhesion	22	3.28358	0.00068594	ALDOA, DAB2IP, LDHA, BAIAP2L1, STK24, BAIAP2, ARHGEF16, LYPLA2, RPL23A, MPP7, SFN, CAPZB, FLNB, MMP24, CORO1B, CRKL, CSNK1D, SPTBN1, EPS8L2, CEACAM1, AHNAK, SEPT9	596	271	16792	2.28723	0.834901	0.593676	1.20982
Annotation Cluster 3	Enrichment Score: 3.4855681849051248
Category	Term	Count	%	PValue	Genes	List Total	Pop Hits	Pop Total	Fold Enrichment	Bonferroni	Benjamini	FDR
UP_KEYWORDS	Calmodulin-binding	17	2.53731	3.0786e-05	ADCY3, TRPM4, MYO10, TRPV1, KCNN3, SNTB1, TRPV4, PPP3CC, MYLK2, RRAD, SPTBN1, MYO9B, SYT7, DAPK2, KCNQ1, EWSR1, DAPK1	660	152	20581	3.48761	0.0119653	0.00171817	0.0427898
GOTERM_MF_DIRECT	GO:0005516~calmodulin binding	19	2.83582	0.00011877	EGFR, TRPM4, ADCY3, TRPV1, RRAD, MYLK2, MYO9B, SYT7, DAPK2, DAPK1, MYO10, KCNN3, SNTB1, SPTBN1, PPP3CC, TRPV4, CACNA1C, KCNQ1, EWSR1	592	189	16881	2.86661	0.0976402	0.0253584	0.184024
UP_SEQ_FEATURE	region of interest:Calmodulin-binding	7	1.04478	0.00955512	TRPM4, KCNN3, SNTB1, MYLK2, RRAD, DAPK2, DAPK1	655	56	20063	3.82882	1	0.725011	15.2307
Annotation Cluster 4	Enrichment Score: 2.94167743977337
Category	Term	Count	%	PValue	Genes	List Total	Pop Hits	Pop Total	Fold Enrichment	Bonferroni	Benjamini	FDR
UP_KEYWORDS	Kinase	49	7.31343	2.57651e-06	COASY, ACVRL1, PFKFB4, NEK3, NUAK1, FASTK, PRKAG2, HK2, PKMYT1, PINK1, HK1, AKAP13, SGMS1, NAGK, SRC, TTBK1, DGKD, OBSL1, TLK1, ITPK1, CDK14, MAP2K6, EGFR, PRKCA, BCR, SGK2, PDXK, STK24, TGFBR1, MINK1, FN3KRP, MYLK2, PRKCG, AK5, DAPK2, PRKCE, DAPK3, DAPK1, DDR1, MAST4, PNKP, HUNK, CSNK1D, CSNK1E, UCKL1, DGKZ, MAPK8, FUK, CALM1	660	735	20581	2.07889	0.00100691	0.000251823	0.00358177
GOTERM_MF_DIRECT	GO:0004672~protein kinase activity	28	4.1791	0.000166521	NEK3, NUAK1, FASTK, PKMYT1, PINK1, TRIB2, SRC, TTBK1, COL4A3BP, MAP2K6, CDK14, EGFR, PRKCA, STK24, TGFBR1, GTF2H4, NPR1, MINK1, PRKCG, DAPK2, PRKCE, DAPK3, DAPK1, HUNK, DDR1, CSNK1D, CSNK1E, NRBP2	592	359	16881	2.22403	0.134158	0.0283995	0.257921
UP_SEQ_FEATURE	domain:Protein kinase	32	4.77612	0.000237722	ACVRL1, NEK3, NUAK1, PKMYT1, PINK1, TRIB2, SRC, TTBK1, TLK1, MAP2K6, CDK14, PRKCA, EGFR, IRAK2, SGK2, STK24, TGFBR1, NPR1, MINK1, MYLK2, PRKCG, PRKCE, DAPK2, DAPK3, DAPK1, DDR1, MAST4, HUNK, CSNK1D, CSNK1E, MAPK8, NRBP2	655	478	20063	2.05058	0.380933	0.112978	0.408337
UP_SEQ_FEATURE	active site:Proton acceptor	40	5.97015	0.000383365	ALDOA, LDHB, LDHA, PXDN, HSD3B1, ACVRL1, NEK3, NUAK1, PKMYT1, PINK1, SRC, TTBK1, TLK1, GALE, CDK14, MAP2K6, WWOX, HSD17B8, PRKCA, EGFR, SGK2, STK24, TGFBR1, MYLK2, MINK1, PRKCG, SIRT6, PRKCE, DAPK2, DAPK3, DAPK1, DDR1, HUNK, MAST4, B3GAT3, CSNK1D, CSNK1E, HSD11B1, MAPK8, RDH16	655	672	20063	1.82325	0.538557	0.120938	0.657733
UP_KEYWORDS	Nucleotide-binding	84	12.5373	0.000384717	ADCY3, ACVRL1, TRPV1, NUAK1, FASTK, GNA12, PRKAG2, PKMYT1, RRAD, PINK1, CNGB1, CRY2, TRPV4, TLK1, ITPK1, GNL1, DCTPP1, MAP2K6, RTEL1, CDK14, EGFR, TRPM4, PRKCA, IRAK2, BCR, SGK2, PDXK, STK24, G3BP1, MINK1, MYLK2, PRKCG, RASL12, DAPK2, PRKCE, DAPK3, NLRP1, DAPK1, MAST4, PNKP, HUNK, DDR1, RAB12, MAPK8, SEPT8, KIF26B, SEPT9, COASY, NEK3, PFKFB4, HK2, HK1, MYO9B, HSPA1B, VARS, NAGK, SRC, TUBB, KIF6, …	660	1788	20581	1.46499	0.139682	0.0165781	0.533504
UP_KEYWORDS	Serine/threonine-protein kinase	27	4.02985	0.000420472	ACVRL1, NEK3, NUAK1, FASTK, PKMYT1, PINK1, TTBK1, TLK1, MAP2K6, CDK14, PRKCA, BCR, SGK2, STK24, TGFBR1, MINK1, MYLK2, PRKCG, DAPK2, PRKCE, DAPK3, DAPK1, MAST4, HUNK, CSNK1D, CSNK1E, MAPK8	660	393	20581	2.14237	0.151631	0.0163095	0.582952
INTERPRO	IPR000719:Protein kinase, catalytic domain	32	4.77612	0.000690778	ACVRL1, NEK3, NUAK1, PKMYT1, PINK1, TRIB2, SRC, TTBK1, TLK1, MAP2K6, CDK14, PRKCA, EGFR, IRAK2, SGK2, STK24, TGFBR1, NPR1, MINK1, MYLK2, PRKCG, PRKCE, DAPK2, DAPK3, DAPK1, DDR1, MAST4, HUNK, CSNK1D, CSNK1E, MAPK8, NRBP2	634	487	18559	1.92347	0.548582	0.232886	1.1052
GOTERM_BP_DIRECT	GO:0006468~protein phosphorylation	31	4.62687	0.000892435	ACVRL1, NEK3, NUAK1, FASTK, PRKAG2, PKMYT1, PINK1, AKAP13, TRIB2, COL4A3BP, TLK1, CDK14, PRKCA, IRAK2, CTBP1, BCR, SGK2, STK24, TGFBR1, NPR1, MINK1, PRKCG, PRKCE, DAPK2, DAPK3, DAPK1, HUNK, CSNK1D, CSNK1E, MAPK8, NRBP2	596	456	16792	1.91537	0.904027	0.542157	1.57131
INTERPRO	IPR008271:Serine/threonine-protein kinase, active site	23	3.43284	0.00110506	PRKCA, ACVRL1, SGK2, NEK3, NUAK1, TGFBR1, PKMYT1, MINK1, MYLK2, PINK1, PRKCG, PRKCE, DAPK2, DAPK3, DAPK1, MAST4, HUNK, CSNK1D, CSNK1E, TLK1, MAPK8, MAP2K6, CDK14	634	312	18559	2.15794	0.719904	0.27251	1.7625
UP_KEYWORDS	ATP-binding	66	9.85075	0.00136742	ADCY3, ACVRL1, TRPV1, NUAK1, FASTK, PRKAG2, PKMYT1, PINK1, TRPV4, TLK1, ITPK1, MAP2K6, RTEL1, CDK14, EGFR, IRAK2, PRKCA, TRPM4, PDXK, SGK2, BCR, STK24, G3BP1, MINK1, MYLK2, PRKCG, PRKCE, DAPK2, DAPK3, NLRP1, DAPK1, MAST4, PNKP, HUNK, DDR1, MAPK8, KIF26B, COASY, NEK3, PFKFB4, HK2, HK1, MYO9B, HSPA1B, VARS, NAGK, SRC, KIF6, DGKD, TTBK1, ACTR3C, CHD4, ACSL6, TRMU, RECQL5, TGFBR1, GARS, AK5, SPATA5L1…	660	1391	20581	1.47958	0.414346	0.0350398	1.88429
INTERPRO	IPR011009:Protein kinase-like domain	33	4.92537	0.00140516	ACVRL1, NEK3, NUAK1, PKMYT1, PINK1, TRIB2, SRC, TTBK1, TLK1, MAP2K6, CDK14, PRKCA, EGFR, IRAK2, SGK2, STK24, TGFBR1, NPR1, MINK1, MYLK2, FN3KRP, PRKCG, PRKCE, DAPK2, DAPK3, DAPK1, DDR1, MAST4, HUNK, CSNK1D, CSNK1E, MAPK8, NRBP2	634	531	18559	1.81922	0.8018	0.206428	2.23611
GOTERM_MF_DIRECT	GO:0004674~protein serine/threonine kinase activity	26	3.8806	0.00169422	ACVRL1, NEK3, NUAK1, FASTK, PINK1, PKMYT1, TTBK1, TLK1, MAP2K6, IRAK2, PRKCA, BCR, SGK2, STK24, TGFBR1, MINK1, DAPK2, PRKCE, DAPK3, DAPK1, MAST4, HUNK, CSNK1D, CSNK1E, MAPK8, NRBP2	592	376	16881	1.9718	0.769324	0.21687	2.59527
SMART	SM00220:S_TKc	26	3.8806	0.0026087	NEK3, NUAK1, PINK1, PKMYT1, TRIB2, TTBK1, TLK1, MAP2K6, CDK14, PRKCA, SGK2, STK24, TGFBR1, MINK1, MYLK2, PRKCG, DAPK2, PRKCE, DAPK3, DAPK1, MAST4, HUNK, CSNK1D, CSNK1E, MAPK8, NRBP2	384	359	10057	1.89678	0.506024	0.297166	3.37613
UP_SEQ_FEATURE	binding site:ATP	32	4.77612	0.00291952	ACVRL1, NEK3, NUAK1, HK2, PKMYT1, PINK1, VARS, NAGK, SRC, TTBK1, TLK1, ITPK1, CDK14, MAP2K6, PRKCA, EGFR, SGK2, STK24, TGFBR1, MINK1, MYLK2, PRKCG, PRKCE, DAPK2, DAPK3, DAPK1, DDR1, MAST4, HUNK, CSNK1D, CSNK1E, MAPK8	655	558	20063	1.75659	0.997253	0.48069	4.9074
GOTERM_BP_DIRECT	GO:0018105~peptidyl-serine phosphorylation	12	1.79104	0.00487561	PRKCA, MAST4, SGK2, CSNK1D, TTBK1, CSNK1E, TGFBR1, PINK1, MAPK8, PRKCG, PRKCE, SRC	596	125	16792	2.70475	0.999997	0.72279	8.30475
INTERPRO	IPR017441:Protein kinase, ATP binding site	24	3.58209	0.00610529	PRKCA, EGFR, ACVRL1, SGK2, NEK3, STK24, NUAK1, TGFBR1, PKMYT1, MINK1, MYLK2, PRKCG, PRKCE, DAPK2, DAPK3, SRC, DAPK1, HUNK, CSNK1D, TTBK1, CSNK1E, TLK1, MAP2K6, CDK14	634	381	18559	1.84396	0.999131	0.58567	9.37963
UP_SEQ_FEATURE	nucleotide phosphate-binding region:ATP	47	7.01493	0.0104988	COASY, ACVRL1, PFKFB4, NEK3, NUAK1, PKMYT1, PINK1, MYO9B, NAGK, SRC, TTBK1, KIF6, TLK1, ITPK1, CDK14, CHD4, RTEL1, MAP2K6, PRKCA, EGFR, TRMU, RECQL5, SGK2, PDXK, STK24, TGFBR1, GARS, MYLK2, MINK1, PRKCG, AK5, PRKCE, DAPK2, ABCG4, DAPK3, NLRP1, DAPK1, DDR1, HUNK, PNKP, MAST4, CSNK1D, CSNK1E, UCKL1, MAPK8, FUK, KIF26B	655	994	20063	1.44833	1	0.714136	16.61
GOTERM_MF_DIRECT	GO:0005524~ATP binding	70	10.4478	0.0108137	ADCY3, ACVRL1, TRPV1, NUAK1, FASTK, PRKAG2, PKMYT1, PINK1, TRPV4, TLK1, ITPK1, MAP2K6, RTEL1, CDK14, EGFR, TRPM4, IRAK2, PRKCA, BCR, PDXK, SGK2, STK24, G3BP1, TPX2, MINK1, MYLK2, PRKCG, DAPK2, PRKCE, DAPK3, NLRP1, DAPK1, MAST4, PNKP, HUNK, DDR1, MAPK8, KIF26B, NRBP2, COASY, NEK3, PFKFB4, HK2, HK1, MYO9B, HSPA1B, VARS, NAGK, TRIB2, SRC, KIF6, DGKD, TTBK1, ACTR3C, CHD4, ACSL6, TRMU, RECQL5, TGFBR1,…	592	1495	16881	1.33516	0.999918	0.609558	15.5159
UP_KEYWORDS	Transferase	69	10.2985	0.0355291	ACVRL1, NUAK1, FASTK, PRKAG2, PKMYT1, PINK1, SGMS1, GSTM2, GNPAT, TLK1, ITPK1, MAP2K6, CDK14, EGFR, PRKCA, BCR, SGK2, PDXK, STK24, MINK1, MYLK2, PRKCG, DAPK2, PRKCE, DAPK3, DAPK1, ST6GALNAC1, MAST4, PNKP, HUNK, DDR1, HAS1, MAPK8, HS3ST3B1, BCAT1, COASY, SRM, NEK3, PFKFB4, SETD1B, HK2, AKAP13, HK1, NAGK, SRC, ARIH2, POLE4, CDYL, DGKD, TTBK1, OBSL1, GAPDH, B4GALNT1, TRMU, DHDDS, TGFBR1, FN3KRP, SIR…	660	1708	20581	1.25975	0.999999	0.304194	39.5231
Annotation Cluster 5	Enrichment Score: 2.8381787345849863
Category	Term	Count	%	PValue	Genes	List Total	Pop Hits	Pop Total	Fold Enrichment	Bonferroni	Benjamini	FDR
KEGG_PATHWAY	hsa00520:Amino sugar and nucleotide sugar metabolism	9	1.34328	0.000305876	PGM2, AMDHD2, GMDS, HK2, HK1, GALE, TSTA3, FUK, NAGK	254	48	6910	5.10089	0.0747621	0.0747621	0.397623
KEGG_PATHWAY	hsa00051:Fructose and mannose metabolism	7	1.04478	0.000922431	ALDOA, PFKFB4, GMDS, HK2, HK1, TSTA3, FUK	254	32	6910	5.95103	0.208959	0.0751606	1.19468
GOTERM_BP_DIRECT	GO:0061621~canonical glycolysis	6	0.895522	0.00194684	ALDOA, PFKFB4, PGAM1, HK2, HK1, GAPDH	596	26	16792	6.50181	0.993997	0.640516	3.39777
GOTERM_BP_DIRECT	GO:0046835~carbohydrate phosphorylation	5	0.746269	0.00808122	PFKFB4, HK2, HK1, FUK, NAGK	596	23	16792	6.12489	1	0.781591	13.4055
Annotation Cluster 6	Enrichment Score: 2.5734249915218608
Category	Term	Count	%	PValue	Genes	List Total	Pop Hits	Pop Total	Fold Enrichment	Bonferroni	Benjamini	FDR
UP_KEYWORDS	Cell junction	42	6.26866	7.10914e-05	CLDN7, PARD3, CCDC85C, TRPV1, RUSC1, SYT7, PXN, NETO1, PCDH1, HMCN1, GCOM1, ANK3, PLEKHG5, SNTB1, TRPV4, VWC2, SV2B, LIMD1, DLG5, CEACAM1, SYNPO, STX1A, BCR, DLGAP2, TGFBR1, RIMBP2, FRMPD2, PSD3, MINK1, PRKCG, MPP7, PALLD, SHANK2, SYNGR3, EGFLAM, PKP1, PLEKHA7, DOK7, ERC2, BIN2, CHRNG, PARVA	660	675	20581	1.9403	0.0274149	0.00346869	0.098785
UP_KEYWORDS	Synapse	21	3.13433	0.0114876	STX1A, BCR, TRPV1, DLGAP2, RUSC1, RIMBP2, PSD3, MINK1, PRKCG, SYT7, SHANK2, SYNGR3, NETO1, EGFLAM, ANK3, DOK7, VWC2, SV2B, ERC2, SYNPO, CHRNG	660	357	20581	1.83431	0.989085	0.178332	14.8387
GOTERM_CC_DIRECT	GO:0030054~cell junction	25	3.73134	0.0233174	PARD3, STX1A, BCR, TRPV1, DLGAP2, RUSC1, RIMBP2, PSD3, MINK1, SYT7, LDLRAD3, SHANK2, SYNGR3, NETO1, EGFLAM, HMCN1, GCOM1, PLEKHA7, DOK7, VWC2, SV2B, ERC2, BIN2, CEACAM1, CHRNG	616	459	18224	1.61135	0.999954	0.352033	28.2341
Annotation Cluster 7	Enrichment Score: 2.3192176054763567
Category	Term	Count	%	PValue	Genes	List Total	Pop Hits	Pop Total	Fold Enrichment	Bonferroni	Benjamini	FDR
INTERPRO	IPR001452:Src homology-3 domain	18	2.68657	0.00135268	C1ORF168, TP53BP2, BAIAP2L1, RUSC1, BAIAP2, NCF4, RIMBP2, ASAP2, ARHGEF16, MPP7, SHANK2, SRC, DOCK4, SH3BP4, CRKL, RIMBP3C, DLG5, EPS8L2	634	218	18559	2.41703	0.78944	0.228689	2.15343
UP_KEYWORDS	SH3 domain	16	2.38806	0.00404058	TP53BP2, BAIAP2L1, RUSC1, BAIAP2, NCF4, RIMBP2, ASAP2, ARHGEF16, MPP7, SRC, DOCK4, SH3BP4, CRKL, RIMBP3C, DLG5, EPS8L2	660	215	20581	2.32062	0.794655	0.0841916	5.47306
UP_SEQ_FEATURE	domain:SH3	14	2.08955	0.00493533	TP53BP2, BAIAP2L1, RUSC1, BAIAP2, NCF4, ARHGEF16, ASAP2, MPP7, SHANK2, SRC, DOCK4, SH3BP4, DLG5, EPS8L2	655	175	20063	2.45044	0.999954	0.564648	8.1624
SMART	SM00326:SH3	17	2.53731	0.0053843	TP53BP2, BAIAP2L1, RUSC1, BAIAP2, NCF4, RIMBP2, ASAP2, ARHGEF16, MPP7, SHANK2, SRC, DOCK4, SH3BP4, CRKL, RIMBP3C, DLG5, EPS8L2	384	206	10057	2.16132	0.767226	0.384855	6.8524
INTERPRO	IPR011511:Variant SH3	7	1.04478	0.0174514	SH3BP4, CRKL, RIMBP3C, RIMBP2, MPP7, SHANK2, DOCK4	634	61	18559	3.35918	1	0.636942	24.6589
Annotation Cluster 8	Enrichment Score: 1.9220393549001276
Category	Term	Count	%	PValue	Genes	List Total	Pop Hits	Pop Total	Fold Enrichment	Bonferroni	Benjamini	FDR
UP_SEQ_FEATURE	domain:C2	10	1.49254	0.00138366	PRKCA, DAB2IP, CAPN5, BCR, CCDC33, WWC2, PRKCG, INPP4A, PRKCE, PLA2G4E	655	82	20063	3.73543	0.93875	0.294676	2.3548
INTERPRO	IPR000008:C2 calcium-dependent membrane targeting	13	1.9403	0.0111171	PRKCA, DAB2IP, CAPN5, CEP120, DYSF, BCR, CCDC33, WWC2, PRKCG, SYT7, INPP4A, PRKCE, PLA2G4E	634	165	18559	2.30635	0.999997	0.628349	16.4558
SMART	SM00239:C2	9	1.34328	0.111394	PRKCA, DAB2IP, CAPN5, DYSF, BCR, PRKCG, SYT7, PRKCE, PLA2G4E	384	127	10057	1.85599	1	0.846756	78.8348
Annotation Cluster 9	Enrichment Score: 1.850482445115701
Category	Term	Count	%	PValue	Genes	List Total	Pop Hits	Pop Total	Fold Enrichment	Bonferroni	Benjamini	FDR
GOTERM_CC_DIRECT	GO:0031932~TORC2 complex	5	0.746269	0.000512061	PRR5, TELO2, PINK1, RPL23A, PRR5L	616	12	18224	12.3268	0.194794	0.0267187	0.717631
GOTERM_BP_DIRECT	GO:0038203~TORC2 signaling	3	0.447761	0.0116728	PRR5, PINK1, PRR5L	596	5	16792	16.9047	1	0.80253	18.802
GOTERM_BP_DIRECT	GO:0001934~positive regulation of protein phosphorylation	6	0.895522	0.469957	EGFR, PRR5, CSNK1D, ARRB1, PINK1, PRR5L	596	127	16792	1.33108	1	0.999728	99.9987
Annotation Cluster 10	Enrichment Score: 1.7518094456206859
Category	Term	Count	%	PValue	Genes	List Total	Pop Hits	Pop Total	Fold Enrichment	Bonferroni	Benjamini	FDR
GOTERM_BP_DIRECT	GO:0035023~regulation of Rho protein signal transduction	10	1.49254	0.00223214	PLEKHG4, PLEKHG3, BCR, PLEKHG5, ARHGEF16, AKAP13, MYO9B, EPS8L2, ARHGEF10L, ARHGDIA	596	81	16792	3.47833	0.997166	0.623806	3.88645
GOTERM_MF_DIRECT	GO:0005089~Rho guanyl-nucleotide exchange factor activity	8	1.19403	0.0180876	PLEKHG4, PLEKHG3, BCR, PLEKHG5, ARHGEF16, AKAP13, EPS8L2, ARHGEF10L	592	77	16881	2.96262	1	0.676251	24.6527
UP_KEYWORDS	Guanine-nucleotide releasing factor	11	1.64179	0.021807	PLEKHG4, BCR, RALGPS1, PSD3, ARHGEF16, AKAP13, DENND2D, ARHGEF10L, IQSEC1, DOCK4, BCAR3	660	149	20581	2.30213	0.99982	0.229903	26.3991
UP_SEQ_FEATURE	domain:DH	7	1.04478	0.0232796	PLEKHG4, PLEKHG3, BCR, PLEKHG5, ARHGEF16, AKAP13, ARHGEF10L	655	68	20063	3.15314	1	0.884624	33.328
INTERPRO	IPR000219:Dbl homology (DH) domain	7	1.04478	0.0339621	PLEKHG4, PLEKHG3, BCR, PLEKHG5, ARHGEF16, AKAP13, ARHGEF10L	634	71	18559	2.88606	1	0.783378	42.6327
SMART	SM00325:RhoGEF	7	1.04478	0.0443072	PLEKHG4, PLEKHG3, BCR, PLEKHG5, ARHGEF16, AKAP13, ARHGEF10L	384	68	10057	2.69604	0.999995	0.639286	44.891
Annotation Cluster 11	Enrichment Score: 1.7478504755543771
Category	Term	Count	%	PValue	Genes	List Total	Pop Hits	Pop Total	Fold Enrichment	Bonferroni	Benjamini	FDR
INTERPRO	IPR016040:NAD(P)-binding domain	16	2.38806	0.00124729	KCNMA1, LDHB, STEAP4, LDHA, CTBP1, HSD3B1, GMDS, DHRS4L1, SAE1, HSD11B1, GALE, TSTA3, RDH16, GAPDH, WWOX, HSD17B8	634	179	18559	2.61657	0.762248	0.249718	1.98723
UP_KEYWORDS	Oxidoreductase	30	4.47761	0.0127056	STEAP4, LDHB, D2HGDH, LDHA, PXDN, HSD3B1, PYROXD1, DHRS4L1, PRDX3, ACOX3, GPX1, IDH2, SMOX, TSTA3, GAPDH, LOXL1, WWOX, DHCR24, HSD17B8, ALKBH6, RNLS, CTBP1, MICAL2, SCD, ALDH3B1, HSD11B1, KDM4B, RDH16, ALKBH5, KDM6B	660	582	20581	1.60739	0.99326	0.18126	16.2859
GOTERM_BP_DIRECT	GO:0055114~oxidation-reduction process	24	3.58209	0.360153	ALKBH6, RNLS, LDHB, STEAP4, CTBP1, PXDN, LDHA, HSD3B1, MICAL2, SCD, NCF4, PYROXD1, DHRS4L1, ALDH3B1, KDM4B, HSD11B1, SMOX, TSTA3, RDH16, LOXL1, WWOX, KDM6B, HSD17B8, DHCR24	596	592	16792	1.14221	1	0.998902	99.9637
Annotation Cluster 12	Enrichment Score: 1.7026295726072451
Category	Term	Count	%	PValue	Genes	List Total	Pop Hits	Pop Total	Fold Enrichment	Bonferroni	Benjamini	FDR
GOTERM_CC_DIRECT	GO:0014069~postsynaptic density	15	2.23881	0.00393235	BCR, DLGAP2, RUSC1, BAIAP2, PSD3, MINK1, PRKCG, SHANK2, SRC, NETO1, ARRB1, SPTBN1, LRP8, CACNA1C, SYNPO	616	184	18224	2.41177	0.811124	0.10516	5.38969
UP_KEYWORDS	Synapse	21	3.13433	0.0114876	STX1A, BCR, TRPV1, DLGAP2, RUSC1, RIMBP2, PSD3, MINK1, PRKCG, SYT7, SHANK2, SYNGR3, NETO1, EGFLAM, ANK3, DOK7, VWC2, SV2B, ERC2, SYNPO, CHRNG	660	357	20581	1.83431	0.989085	0.178332	14.8387
GOTERM_CC_DIRECT	GO:0045211~postsynaptic membrane	13	1.9403	0.0546335	BCR, DLGAP2, TRPV1, RUSC1, PSD3, MINK1, SHANK2, NETO1, ARRB1, ANK3, IL1RAPL1, SYNPO, CHRNG	616	211	18224	1.82274	1	0.483224	54.616
UP_KEYWORDS	Postsynaptic cell membrane	11	1.64179	0.062682	BCR, TRPV1, DLGAP2, ANK3, RUSC1, PSD3, MINK1, SHANK2, NETO1, SYNPO, CHRNG	660	179	20581	1.91629	1	0.430192	59.3392
Annotation Cluster 13	Enrichment Score: 1.690623627180083
Category	Term	Count	%	PValue	Genes	List Total	Pop Hits	Pop Total	Fold Enrichment	Bonferroni	Benjamini	FDR
INTERPRO	IPR016040:NAD(P)-binding domain	16	2.38806	0.00124729	KCNMA1, LDHB, STEAP4, LDHA, CTBP1, HSD3B1, GMDS, DHRS4L1, SAE1, HSD11B1, GALE, TSTA3, RDH16, GAPDH, WWOX, HSD17B8	634	179	18559	2.61657	0.762248	0.249718	1.98723
UP_SEQ_FEATURE	nucleotide phosphate-binding region:NAD	9	1.34328	0.00450126	LDHB, LDHA, CTBP1, SIRT6, GALE, RDH16, GAPDH, ALDH3B1, HSD17B8	655	80	20063	3.44594	0.999888	0.597457	7.47048
UP_KEYWORDS	NAD	12	1.79104	0.0255951	RNLS, STEAP4, LDHB, LDHA, CTBP1, HSD3B1, SIRT6, GALE, RDH16, GAPDH, ALDH3B1, HSD17B8	660	175	20581	2.13829	0.99996	0.25148	30.264
GOTERM_MF_DIRECT	GO:0051287~NAD binding	5	0.746269	0.042904	LDHB, LDHA, CTBP1, IDH2, GAPDH	592	38	16881	3.752	1	0.821678	49.3398
UP_SEQ_FEATURE	binding site:NAD	5	0.746269	0.0988967	LDHB, LDHA, CTBP1, HSD3B1, GAPDH	655	54	20063	2.83616	1	0.986248	83.3405
GOTERM_MF_DIRECT	GO:0016616~oxidoreductase activity, acting on the CH-OH group of donors, NAD or NADP as acceptor	3	0.447761	0.117793	LDHB, LDHA, CTBP1	592	17	16881	5.03209	1	0.924314	85.6803
Annotation Cluster 14	Enrichment Score: 1.666986083625116
Category	Term	Count	%	PValue	Genes	List Total	Pop Hits	Pop Total	Fold Enrichment	Bonferroni	Benjamini	FDR
KEGG_PATHWAY	hsa00520:Amino sugar and nucleotide sugar metabolism	9	1.34328	0.000305876	PGM2, AMDHD2, GMDS, HK2, HK1, GALE, TSTA3, FUK, NAGK	254	48	6910	5.10089	0.0747621	0.0747621	0.397623
KEGG_PATHWAY	hsa00052:Galactose metabolism	4	0.597015	0.0954157	PGM2, HK2, HK1, GALE	254	30	6910	3.6273	1	0.537843	72.9094
KEGG_PATHWAY	hsa00500:Starch and sucrose metabolism	3	0.447761	0.341882	PGM2, HK2, HK1	254	33	6910	2.47316	1	0.717782	99.5698
Annotation Cluster 15	Enrichment Score: 1.6106351657897406
Category	Term	Count	%	PValue	Genes	List Total	Pop Hits	Pop Total	Fold Enrichment	Bonferroni	Benjamini	FDR
INTERPRO	IPR001478:PDZ domain	12	1.79104	0.0173443	MAST4, PARD3, HTRA2, SNTB1, FRMPD2, PDLIM2, MPP7, SYNPO2, DLG5, SHANK2, AHNAK, SNTG2	634	155	18559	2.26629	1	0.653516	24.5268
SMART	SM00228:PDZ	12	1.79104	0.0268925	MAST4, PARD3, HTRA2, SNTB1, FRMPD2, PDLIM2, MPP7, SYNPO2, DLG5, SHANK2, AHNAK, SNTG2	384	149	10057	2.10927	0.999364	0.558608	30.1226
UP_SEQ_FEATURE	domain:PDZ	9	1.34328	0.0315723	MAST4, HTRA2, SNTB1, PDLIM2, MPP7, SYNPO2, SHANK2, AHNAK, SNTG2	655	113	20063	2.4396	1	0.908973	42.4276
Annotation Cluster 16	Enrichment Score: 1.5938706617452298
Category	Term	Count	%	PValue	Genes	List Total	Pop Hits	Pop Total	Fold Enrichment	Bonferroni	Benjamini	FDR
UP_SEQ_FEATURE	region of interest:Domain III	4	0.597015	0.00467722	CAPN5, CAPN11, CAPN12, CAPN2	655	11	20063	11.1384	0.999922	0.576687	7.75155
INTERPRO	IPR022683:Peptidase C2, calpain, domain III	4	0.597015	0.00690027	CAPN5, CAPN11, CAPN12, CAPN2	634	12	18559	9.75762	0.999654	0.587503	10.5384
INTERPRO	IPR022682:Peptidase C2, calpain, large subunit, domain III	4	0.597015	0.00874552	CAPN5, CAPN11, CAPN12, CAPN2	634	13	18559	9.00704	0.999959	0.601132	13.1746
SMART	SM00720:calpain_III	4	0.597015	0.00932825	CAPN5, CAPN11, CAPN12, CAPN2	384	12	10057	8.73003	0.920377	0.468798	11.5935
UP_SEQ_FEATURE	domain:Calpain catalytic	4	0.597015	0.00959373	CAPN5, CAPN11, CAPN12, CAPN2	655	14	20063	8.75158	1	0.703364	15.2875
INTERPRO	IPR022684:Peptidase C2, calpain family	4	0.597015	0.0108522	CAPN5, CAPN11, CAPN12, CAPN2	634	14	18559	8.36368	0.999996	0.648868	16.0952
INTERPRO	IPR001300:Peptidase C2, calpain, catalytic domain	4	0.597015	0.0132265	CAPN5, CAPN11, CAPN12, CAPN2	634	15	18559	7.8061	1	0.594033	19.2763
SMART	SM00230:CysPc	4	0.597015	0.0177278	CAPN5, CAPN11, CAPN12, CAPN2	384	15	10057	6.98403	0.992009	0.55287	20.957
UP_SEQ_FEATURE	region of interest:Domain IV	3	0.447761	0.0199819	CAPN11, CAPN12, CAPN2	655	7	20063	13.1274	1	0.856102	29.346
INTERPRO	IPR000169:Cysteine peptidase, cysteine active site	4	0.597015	0.0332521	CAPN5, CAPN11, CAPN12, CAPN2	634	21	18559	5.57578	1	0.789224	41.9509
GOTERM_MF_DIRECT	GO:0004198~calcium-dependent cysteine-type endopeptidase activity	4	0.597015	0.0355243	CAPN5, CAPN11, CAPN12, CAPN2	592	21	16881	5.43147	1	0.790782	42.9315
UP_KEYWORDS	Thiol protease	9	1.34328	0.118805	CAPN5, ATG4D, CAPN11, CAPN12, ATG4B, USP5, USP1, CAPN2, USP25	660	153	20581	1.83431	1	0.555448	82.7654
INTERPRO	IPR018247:EF-Hand 1, calcium-binding site	8	1.19403	0.405332	FKBP9, NKD1, CAPN11, CAPN12, S100A9, FKBP10, CAPN2, CALM1	634	178	18559	1.31563	1	0.999122	99.9766
INTERPRO	IPR002048:EF-hand domain	8	1.19403	0.663961	FKBP9, NKD1, CAPN11, CAPN12, S100A9, FKBP10, CAPN2, CALM1	634	228	18559	1.02712	1	0.999983	100
Annotation Cluster 17	Enrichment Score: 1.5916416025660796
Category	Term	Count	%	PValue	Genes	List Total	Pop Hits	Pop Total	Fold Enrichment	Bonferroni	Benjamini	FDR
UP_KEYWORDS	Cell membrane	124	18.5075	0.0126722	LYPD2, ADCY3, SLC36A2, RUSC1, S100A9, RRAD, SYT7, VIPR1, SLC16A1, DYSF, MC1R, GCOM1, ANK3, DNAJC9, SLC2A1, CCR10, CSF3R, CDH23, GNG7, EGFR, DAB2IP, BCR, VANGL2, PSD3, SSTR2, CCR7, LYNX1, ARRB1, TMEM184A, BIN2, SNTG2, RALGPS1, PTH1R, ASAP2, SRC, CD68, SERINC5, P2RY6, RAC3, SCARB1, IL1RAPL1, EWSR1, TGFBR1, OSBPL7, SPPL2B, SHANK2, DOCK4, MYO10, NOTCH4, TGFBR3, SPTBN1, ANTXR2, CACNA1C, PLEKHA2, CHRNG…	660	3175	20581	1.21787	0.993171	0.187607	16.2466
GOTERM_CC_DIRECT	GO:0005886~plasma membrane	163	24.3284	0.0152027	LYPD2, ADCY3, SLC36A2, S100A9, GNA12, JAG2, RRAD, CNGB1, SGMS1, SYT7, VIPR1, TLR9, SLC16A1, DYSF, MC1R, ANK3, DNAJC9, SLC2A1, CCR10, CSF3R, WWOX, CDH23, GNG7, EGFR, DAB2IP, PTPRF, BAIAP2, VANGL2, HLA-E, SIRPA, SLC34A2, SSTR2, KRT19, CCR7, LYNX1, HAS1, ARRB1, TMEM184A, EPS8L2, EMP1, PLXNC1, RALGPS1, PTH1R, ASAP2, AFAP1L2, SRC, PXN, PAQR5, CD68, P2RY6, SERINC5, RAC3, RHOBTB2, RHOBTB1, LGSN, SCARB1,…	616	4121	18224	1.17017	0.998466	0.288983	19.3793
UP_KEYWORDS	Membrane	258	38.5075	0.0871567	LYPD2, ADCY3, SLC36A2, LDHA, RUSC1, S100A9, VPS52, SGMS1, SYT7, MED28, MC1R, HTRA2, PRRT3, CCR10, INSIG1, C6ORF136, TMEM14C, CDH23, GNG7, DAB2IP, BCR, PTPRF, NCF4, VANGL2, SIRPA, BCL2L11, LHFPL3, PITPNM1, SSTR2, CCR7, HAS1, HSD11B1, TMEM184A, RAB12, BIN2, CALHM3, HS3ST3B1, BLCAP, ALDOA, RALGPS1, MTX1, PTH1R, ASAP2, AKAP13, SYPL2, SORCS2, CD68, SERINC5, RAC3, PPP2R2B, IL1RAPL1, TGFBR1, SCD, OSBPL7…	660	7494	20581	1.07357	1	0.502983	71.8529
Annotation Cluster 18	Enrichment Score: 1.4127836378477054
Category	Term	Count	%	PValue	Genes	List Total	Pop Hits	Pop Total	Fold Enrichment	Bonferroni	Benjamini	FDR
GOTERM_BP_DIRECT	GO:0072656~maintenance of protein location in mitochondrion	3	0.447761	0.0116728	HK2, HK1, PINK1	596	5	16792	16.9047	1	0.80253	18.802
GOTERM_BP_DIRECT	GO:0072655~establishment of protein localization to mitochondrion	3	0.447761	0.0171006	HK2, HK1, PINK1	596	6	16792	14.0872	1	0.801515	26.3591
UP_KEYWORDS	Mitochondrion outer membrane	6	0.895522	0.289378	MTX1, HK2, HK1, PINK1, PPP2R2B, ACSL6	660	112	20581	1.67054	1	0.75852	99.134
Annotation Cluster 19	Enrichment Score: 1.3972363382355768
Category	Term	Count	%	PValue	Genes	List Total	Pop Hits	Pop Total	Fold Enrichment	Bonferroni	Benjamini	FDR
GOTERM_BP_DIRECT	GO:0061621~canonical glycolysis	6	0.895522	0.00194684	ALDOA, PFKFB4, PGAM1, HK2, HK1, GAPDH	596	26	16792	6.50181	0.993997	0.640516	3.39777
KEGG_PATHWAY	hsa00010:Glycolysis / Gluconeogenesis	9	1.34328	0.00290496	ALDOA, PGM2, LDHB, LDHA, PGAM1, HK2, HK1, GAPDH, ALDH3B1	254	67	6910	3.65437	0.522377	0.100181	3.71788
GOTERM_BP_DIRECT	GO:0006096~glycolytic process	6	0.895522	0.00652611	ALDOA, LDHA, PGAM1, HK2, HK1, GAPDH	596	34	16792	4.97197	1	0.761233	10.9654
UP_KEYWORDS	Glycolysis	5	0.746269	0.0165038	ALDOA, PGAM1, HK2, HK1, GAPDH	660	31	20581	5.02957	0.998507	0.200983	20.6536
KEGG_PATHWAY	hsa01130:Biosynthesis of antibiotics	14	2.08955	0.0469434	BCAT1, ALDOA, LDHB, LDHA, HK2, PGAM1, HK1, ICMT, AK5, PGM2, AMDHD2, HMGCS2, IDH2, GAPDH	254	212	6910	1.79654	0.999995	0.398818	46.5368
BIOCARTA	h_glycolysisPathway:Glycolysis Pathway	3	0.447761	0.0833415	PGAM1, HK1, GAPDH	81	10	1625	6.01852	1	0.694927	66.1246
KEGG_PATHWAY	hsa05230:Central carbon metabolism in cancer	6	0.895522	0.0842024	EGFR, SLC2A1, PGAM1, HK2, HK1, SIRT6	254	64	6910	2.55044	1	0.51359	68.1947
KEGG_PATHWAY	hsa01230:Biosynthesis of amino acids	5	0.746269	0.286349	ALDOA, BCAT1, PGAM1, IDH2, GAPDH	254	74	6910	1.83816	1	0.680989	98.7644
KEGG_PATHWAY	hsa01200:Carbon metabolism	6	0.895522	0.398617	ALDOA, PGAM1, IDH2, HK2, HK1, GAPDH	254	113	6910	1.4445	1	0.743245	99.867
GOTERM_BP_DIRECT	GO:0006094~gluconeogenesis	3	0.447761	0.465283	ALDOA, PGAM1, GAPDH	596	44	16792	1.92099	1	0.99973	99.9985
Annotation Cluster 20	Enrichment Score: 1.365470221248614
Category	Term	Count	%	PValue	Genes	List Total	Pop Hits	Pop Total	Fold Enrichment	Bonferroni	Benjamini	FDR
UP_KEYWORDS	LIM domain	8	1.19403	0.00814332	LMX1B, MICAL2, LIMCH1, FHL2, PDLIM2, LIMD1, LHX8, PXN	660	72	20581	3.46481	0.959118	0.147732	10.7448
INTERPRO	IPR001781:Zinc finger, LIM-type	8	1.19403	0.0112669	LMX1B, MICAL2, LIMCH1, FHL2, PDLIM2, LIMD1, LHX8, PXN	634	72	18559	3.25254	0.999998	0.606059	16.6591
SMART	SM00132:LIM	8	1.19403	0.0193562	LMX1B, MICAL2, LIMCH1, FHL2, PDLIM2, LIMD1, LHX8, PXN	384	72	10057	2.91001	0.994894	0.52948	22.6627
UP_SEQ_FEATURE	domain:LIM zinc-binding 1	5	0.746269	0.0795029	LMX1B, FHL2, LIMD1, LHX8, PXN	655	50	20063	3.06305	1	0.977574	75.9664
UP_SEQ_FEATURE	domain:LIM zinc-binding 2	5	0.746269	0.0795029	LMX1B, FHL2, LIMD1, LHX8, PXN	655	50	20063	3.06305	1	0.977574	75.9664
UP_SEQ_FEATURE	domain:LIM zinc-binding	3	0.447761	0.126078	MICAL2, LIMCH1, PDLIM2	655	19	20063	4.8364	1	0.989223	90.1659
UP_SEQ_FEATURE	domain:LIM zinc-binding 3	3	0.447761	0.195379	FHL2, LIMD1, PXN	655	25	20063	3.67566	1	0.998096	97.6275
Annotation Cluster 21	Enrichment Score: 1.3217021297023095
Category	Term	Count	%	PValue	Genes	List Total	Pop Hits	Pop Total	Fold Enrichment	Bonferroni	Benjamini	FDR
KEGG_PATHWAY	hsa04912:GnRH signaling pathway	9	1.34328	0.0178999	PRKCA, ADCY3, EGFR, MAPK8, CACNA1C, PLA2G4E, MAP2K6, SRC, CALM1	254	91	6910	2.69058	0.989824	0.249289	20.961
BIOCARTA	h_at1rPathway:Angiotensin II mediated activation of JNK Pathway via Pyk2 dependent signaling	6	0.895522	0.0204295	PRKCA, EGFR, MEF2D, MAPK8, SRC, CALM1	81	33	1625	3.64759	0.980599	0.545469	22.6449
KEGG_PATHWAY	hsa04915:Estrogen signaling pathway	6	0.895522	0.296337	ADCY3, EGFR, FOS, HSPA1B, SRC, CALM1	254	99	6910	1.64877	1	0.681611	98.9716
Annotation Cluster 22	Enrichment Score: 1.224708429958793
Category	Term	Count	%	PValue	Genes	List Total	Pop Hits	Pop Total	Fold Enrichment	Bonferroni	Benjamini	FDR
UP_SEQ_FEATURE	domain:LDL-receptor class A 2	5	0.746269	0.0108153	C1QTNF5, LRP1, LDLR, LRP8, LDLRAD3	655	27	20063	5.67232	1	0.704332	17.0679
UP_SEQ_FEATURE	domain:LDL-receptor class A 1	5	0.746269	0.0108153	C1QTNF5, LRP1, LDLR, LRP8, LDLRAD3	655	27	20063	5.67232	1	0.704332	17.0679
INTERPRO	IPR018097:EGF-like calcium-binding, conserved site	9	1.34328	0.0233227	HMCN1, LRP1, LTBP2, SCUBE3, LDLR, NOTCH4, JAG2, EGFL8, LRP8	634	102	18559	2.5829	1	0.725677	31.5822
INTERPRO	IPR000152:EGF-type aspartate/asparagine hydroxylation site	9	1.34328	0.0271751	HMCN1, LRP1, LTBP2, SCUBE3, LDLR, NOTCH4, JAG2, EGFL8, LRP8	634	105	18559	2.5091	1	0.748108	35.7957
UP_SEQ_FEATURE	domain:LDL-receptor class A 3	4	0.597015	0.0296223	LRP1, LDLR, LRP8, LDLRAD3	655	21	20063	5.83439	1	0.911614	40.3997
UP_SEQ_FEATURE	domain:EGF-like 2; calcium-binding	6	0.895522	0.0402857	HMCN1, LRP1, SCUBE3, LDLR, EGFL8, LRP8	655	58	20063	3.16868	1	0.931123	50.7212
UP_SEQ_FEATURE	domain:EGF-like 1	9	1.34328	0.0427205	EGFLAM, LRP1, LTBP2, LDLR, NOTCH4, JAG2, EGFL8, CNTNAP1, LRP8	655	120	20063	2.29729	1	0.936196	52.8292
UP_SEQ_FEATURE	domain:EGF-like 4	6	0.895522	0.0428841	TNXB, LRP1, LTBP2, SCUBE3, NOTCH4, JAG2	655	59	20063	3.11497	1	0.931368	52.9678
INTERPRO	IPR023415:Low-density lipoprotein (LDL) receptor class A, conserved site	5	0.746269	0.0465161	LRP1, LDLR, LRP8, LDLRAD3, NETO1	634	40	18559	3.65911	1	0.858866	53.5163
UP_SEQ_FEATURE	domain:LDL-receptor class A 6	3	0.447761	0.0480196	LRP1, LDLR, LRP8	655	11	20063	8.35378	1	0.946032	57.127
UP_SEQ_FEATURE	domain:LDL-receptor class A 7	3	0.447761	0.0480196	LRP1, LDLR, LRP8	655	11	20063	8.35378	1	0.946032	57.127
UP_SEQ_FEATURE	domain:LDL-receptor class A 5	3	0.447761	0.0564062	LRP1, LDLR, LRP8	655	12	20063	7.65763	1	0.964771	63.1832
UP_SEQ_FEATURE	repeat:LDL-receptor class B 5	3	0.447761	0.0652577	LRP1, LDLR, LRP8	655	13	20063	7.06858	1	0.97218	68.6959
GOTERM_MF_DIRECT	GO:0005041~low-density lipoprotein receptor activity	3	0.447761	0.0739617	LRP1, LDLR, LRP8	592	13	16881	6.58043	1	0.890906	69.6263
UP_SEQ_FEATURE	repeat:LDL-receptor class B 4	3	0.447761	0.0745351	LRP1, LDLR, LRP8	655	14	20063	6.56369	1	0.977865	73.6338
UP_SEQ_FEATURE	repeat:LDL-receptor class B 3	3	0.447761	0.0745351	LRP1, LDLR, LRP8	655	14	20063	6.56369	1	0.977865	73.6338
UP_SEQ_FEATURE	repeat:LDL-receptor class B 2	3	0.447761	0.0745351	LRP1, LDLR, LRP8	655	14	20063	6.56369	1	0.977865	73.6338
UP_SEQ_FEATURE	repeat:LDL-receptor class B 1	3	0.447761	0.0745351	LRP1, LDLR, LRP8	655	14	20063	6.56369	1	0.977865	73.6338
INTERPRO	IPR002172:Low-density lipoprotein (LDL) receptor class A repeat	5	0.746269	0.0803705	LRP1, LDLR, LRP8, LDLRAD3, NETO1	634	48	18559	3.04926	1	0.94619	74.0108
INTERPRO	IPR000033:LDLR class B repeat	3	0.447761	0.091002	LRP1, LDLR, LRP8	634	15	18559	5.85457	1	0.948599	78.4436
UP_KEYWORDS	Endocytosis	8	1.19403	0.0940009	SH3BP4, LRP1, LDLR, AP2A1, DGKD, CLEC9A, LRP8, DNM1	660	121	20581	2.06171	1	0.510702	74.6489
UP_SEQ_FEATURE	domain:LDL-receptor class A 4	3	0.447761	0.0942208	LRP1, LDLR, LRP8	655	16	20063	5.74323	1	0.984367	81.7885
SMART	SM00192:LDLa	5	0.746269	0.0968274	LRP1, LDLR, LRP8, LDLRAD3, NETO1	384	46	10057	2.84675	1	0.859716	73.79
SMART	SM00135:LY	3	0.447761	0.109632	LRP1, LDLR, LRP8	384	15	10057	5.23802	1	0.859077	78.2765
GOTERM_BP_DIRECT	GO:0006898~receptor-mediated endocytosis	9	1.34328	0.339053	EGFR, LRP1, LDLR, CLEC9A, SCARB1, LRP8, LDLRAD3, TINAGL1, DNM1	596	186	16792	1.36328	1	0.998677	99.9354
INTERPRO	IPR011042:Six-bladed beta-propeller, TolB-like	3	0.447761	0.422056	LRP1, LDLR, LRP8	634	42	18559	2.09092	1	0.999232	99.9852
Annotation Cluster 23	Enrichment Score: 1.2188688777705734
Category	Term	Count	%	PValue	Genes	List Total	Pop Hits	Pop Total	Fold Enrichment	Bonferroni	Benjamini	FDR
INTERPRO	IPR009030:Insulin-like growth factor binding protein, N-terminal	12	1.79104	0.00811651	EGFR, WISP1, HMCN1, LRP1, LTBP2, SCUBE3, LDLR, IGFBP7, NOTCH4, JAG2, LRP8, PCSK6	634	139	18559	2.52715	0.999916	0.608599	12.2843
INTERPRO	IPR001881:EGF-like calcium-binding	11	1.64179	0.0116973	EGFLAM, HMCN1, LRP1, LTBP2, SCUBE3, LDLR, PAMR1, NOTCH4, JAG2, EGFL8, LRP8	634	127	18559	2.53545	0.999999	0.594593	17.2407
UP_SEQ_FEATURE	domain:EGF-like 12; calcium-binding	4	0.597015	0.0117056	LRP1, LTBP2, NOTCH4, JAG2	655	15	20063	8.16814	1	0.713488	18.3432
UP_SEQ_FEATURE	domain:EGF-like 7; calcium-binding	5	0.746269	0.0122994	HMCN1, LTBP2, SCUBE3, NOTCH4, JAG2	655	28	20063	5.46974	1	0.712945	19.1833
SMART	SM00181:EGF	15	2.23881	0.0126496	TNXB, SCUBE3, LDLR, LTBP2, PAMR1, JAG2, EGFLAM, HMCN1, LRP1, LAMA5, NOTCH4, LAMC2, LRP8, EGFL8, PCSK6	384	188	10057	2.08964	0.967844	0.497135	15.4121
INTERPRO	IPR000742:Epidermal growth factor-like domain	16	2.38806	0.0131699	TNXB, SCUBE3, LDLR, LTBP2, PAMR1, JAG2, EGFLAM, HMCN1, LRP1, LAMA5, NOTCH4, EGFL8, LAMC2, LRP8, CNTNAP1, PCSK6	634	231	18559	2.02756	1	0.614688	19.2018
SMART	SM00179:EGF_CA	11	1.64179	0.0229885	EGFLAM, HMCN1, LRP1, LTBP2, SCUBE3, LDLR, PAMR1, NOTCH4, JAG2, EGFL8, LRP8	384	127	10057	2.26843	0.998125	0.543843	26.3455
INTERPRO	IPR018097:EGF-like calcium-binding, conserved site	9	1.34328	0.0233227	HMCN1, LRP1, LTBP2, SCUBE3, LDLR, NOTCH4, JAG2, EGFL8, LRP8	634	102	18559	2.5829	1	0.725677	31.5822
INTERPRO	IPR000152:EGF-type aspartate/asparagine hydroxylation site	9	1.34328	0.0271751	HMCN1, LRP1, LTBP2, SCUBE3, LDLR, NOTCH4, JAG2, EGFL8, LRP8	634	105	18559	2.5091	1	0.748108	35.7957
UP_SEQ_FEATURE	domain:EGF-like 2; calcium-binding	6	0.895522	0.0402857	HMCN1, LRP1, SCUBE3, LDLR, EGFL8, LRP8	655	58	20063	3.16868	1	0.931123	50.7212
UP_SEQ_FEATURE	domain:EGF-like 1	9	1.34328	0.0427205	EGFLAM, LRP1, LTBP2, LDLR, NOTCH4, JAG2, EGFL8, CNTNAP1, LRP8	655	120	20063	2.29729	1	0.936196	52.8292
UP_SEQ_FEATURE	domain:EGF-like 4	6	0.895522	0.0428841	TNXB, LRP1, LTBP2, SCUBE3, NOTCH4, JAG2	655	59	20063	3.11497	1	0.931368	52.9678
UP_SEQ_FEATURE	domain:EGF-like 15; calcium-binding	3	0.447761	0.0564062	LTBP2, NOTCH4, JAG2	655	12	20063	7.65763	1	0.964771	63.1832
UP_SEQ_FEATURE	domain:EGF-like 11; calcium-binding	3	0.447761	0.0745351	LTBP2, NOTCH4, JAG2	655	14	20063	6.56369	1	0.977865	73.6338
INTERPRO	IPR013032:EGF-like, conserved site	12	1.79104	0.0794169	EGFLAM, TNXB, HMCN1, LRP1, LTBP2, SCUBE3, LDLR, PAMR1, NOTCH4, JAG2, EGFL8, LRP8	634	199	18559	1.7652	1	0.949021	73.5739
UP_KEYWORDS	EGF-like domain	13	1.9403	0.0818894	TNXB, SCUBE3, LDLR, LTBP2, PAMR1, JAG2, HMCN1, LRP1, EGFLAM, NOTCH4, LRP8, CNTNAP1, EGFL8	660	238	20581	1.70329	1	0.501404	69.509
UP_SEQ_FEATURE	domain:EGF-like 14	3	0.447761	0.0842011	TNXB, LRP1, JAG2	655	15	20063	6.12611	1	0.9806	77.9924
UP_SEQ_FEATURE	domain:EGF-like 9; calcium-binding	3	0.447761	0.0942208	LTBP2, SCUBE3, NOTCH4	655	16	20063	5.74323	1	0.984367	81.7885
UP_SEQ_FEATURE	domain:EGF-like 3	6	0.895522	0.102086	EGFLAM, TNXB, LRP1, LDLR, NOTCH4, JAG2	655	76	20063	2.4182	1	0.984652	84.3267
UP_SEQ_FEATURE	domain:EGF-like 13	3	0.447761	0.104561	TNXB, LRP1, JAG2	655	17	20063	5.40539	1	0.982581	85.0538
UP_SEQ_FEATURE	domain:EGF-like 5; calcium-binding	4	0.597015	0.12599	HMCN1, LTBP2, NOTCH4, JAG2	655	38	20063	3.22427	1	0.989985	90.1488
UP_SEQ_FEATURE	domain:EGF-like 2	6	0.895522	0.16501	EGFLAM, TNXB, LTBP2, NOTCH4, JAG2, CNTNAP1	655	89	20063	2.06498	1	0.996287	95.5113
UP_SEQ_FEATURE	domain:EGF-like 8; calcium-binding	3	0.447761	0.183475	LTBP2, SCUBE3, NOTCH4	655	24	20063	3.82882	1	0.997762	96.9452
UP_SEQ_FEATURE	domain:EGF-like 9	3	0.447761	0.183475	TNXB, LRP1, JAG2	655	24	20063	3.82882	1	0.997762	96.9452
UP_SEQ_FEATURE	domain:EGF-like 8	3	0.447761	0.207376	TNXB, LRP1, JAG2	655	26	20063	3.53429	1	0.998512	98.168
UP_SEQ_FEATURE	domain:EGF-like 6; calcium-binding	3	0.447761	0.207376	HMCN1, LTBP2, JAG2	655	26	20063	3.53429	1	0.998512	98.168
INTERPRO	IPR026823:Complement Clr-like EGF domain	3	0.447761	0.247345	HMCN1, LRP1, SCUBE3	634	28	18559	3.13638	1	0.995708	98.9641
GOTERM_MF_DIRECT	GO:0005509~calcium ion binding	29	4.32836	0.301932	FKBP9, NKD1, LDLR, LTBP2, PAMR1, S100A9, JAG2, SYT7, MMP25, TPM4, PCDHGA1, MMP24, PCDH1, HMCN1, DYSF, CDH23, SCUBE3, CAPN2, ANXA5, MAN1C1, EGFLAM, LRP1, CAPN11, CAPN12, NOTCH4, EGFL8, LRP8, FKBP10, CALM1	592	717	16881	1.15333	1	0.984165	99.6205
UP_SEQ_FEATURE	domain:EGF-like 3; calcium-binding	3	0.447761	0.352787	HMCN1, LTBP2, SCUBE3	655	38	20063	2.4182	1	0.999832	99.944
Annotation Cluster 24	Enrichment Score: 1.207232311251948
Category	Term	Count	%	PValue	Genes	List Total	Pop Hits	Pop Total	Fold Enrichment	Bonferroni	Benjamini	FDR
BIOCARTA	h_keratinocytePathway:Keratinocyte Differentiation	8	1.19403	0.00770391	PRKCA, EGFR, FOS, ETS1, MAPK8, PRKCG, PRKCE, MAP2K6	81	48	1625	3.34362	0.771711	0.388831	9.17206
KEGG_PATHWAY	hsa04012:ErbB signaling pathway	7	1.04478	0.0985857	PRKCA, EGFR, CRKL, GAB1, MAPK8, PRKCG, SRC	254	87	6910	2.18889	1	0.519197	74.1201
KEGG_PATHWAY	hsa04014:Ras signaling pathway	11	1.64179	0.314614	PRKCA, EGFR, RAC3, ETS1, GAB1, MAPK8, PRKCG, FGF2, PLA2G4E, GNG7, CALM1	254	226	6910	1.32412	1	0.698634	99.27
Annotation Cluster 25	Enrichment Score: 1.1896950825763029
Category	Term	Count	%	PValue	Genes	List Total	Pop Hits	Pop Total	Fold Enrichment	Bonferroni	Benjamini	FDR
BIOCARTA	h_keratinocytePathway:Keratinocyte Differentiation	8	1.19403	0.00770391	PRKCA, EGFR, FOS, ETS1, MAPK8, PRKCG, PRKCE, MAP2K6	81	48	1625	3.34362	0.771711	0.388831	9.17206
BIOCARTA	h_tcrPathway:T Cell Receptor Signaling Pathway	7	1.04478	0.0185564	PRKCA, FOS, CD247, PPP3CC, MAPK8, NFATC1, CALM1	81	44	1625	3.19164	0.972057	0.591145	20.7846
BIOCARTA	h_bcrPathway:BCR Signaling Pathway	6	0.895522	0.0230483	PRKCA, FOS, PPP3CC, MAPK8, NFATC1, CALM1	81	34	1625	3.54031	0.988365	0.523979	25.1784
KEGG_PATHWAY	hsa05231:Choline metabolism in cancer	9	1.34328	0.0312438	PRKCA, EGFR, FOS, DGKD, RAC3, DGKZ, MAPK8, PRKCG, PLA2G4E	254	101	6910	2.42418	0.999685	0.331773	33.8598
BIOCARTA	h_ccr5Pathway:Pertussis toxin-insensitive CCR5 Signaling in Macrophage	4	0.597015	0.0474423	PRKCA, FOS, MAPK8, CALM1	81	17	1625	4.72041	0.999907	0.643527	45.3714
BIOCARTA	h_arenrf2Pathway:Oxidative Stress Induced Gene Expression Via Nrf2	4	0.597015	0.0715948	PRKCA, MAFF, FOS, MAPK8	81	20	1625	4.01235	0.999999	0.693458	60.3106
BIOCARTA	h_egfPathway:EGF Signaling Pathway	4	0.597015	0.144169	PRKCA, EGFR, FOS, MAPK8	81	27	1625	2.97211	1	0.790916	85.5807
BIOCARTA	h_cardiacEGFPathway:Role of EGF Receptor Transactivation by GPCRs in Cardiac Hypertrophy	3	0.447761	0.22096	PRKCA, EGFR, FOS	81	18	1625	3.34362	1	0.88557	95.5222
KEGG_PATHWAY	hsa05161:Hepatitis B	8	1.19403	0.281009	PRKCA, E2F1, FOS, TGFBR1, MAPK8, PRKCG, SRC, NFATC1	254	145	6910	1.50095	1	0.677735	98.6384
BIOCARTA	h_pdgfPathway:PDGF Signaling Pathway	3	0.447761	0.405029	PRKCA, FOS, MAPK8	81	28	1625	2.14947	1	0.950477	99.8434
Annotation Cluster 26	Enrichment Score: 1.1634962118464027
Category	Term	Count	%	PValue	Genes	List Total	Pop Hits	Pop Total	Fold Enrichment	Bonferroni	Benjamini	FDR
UP_SEQ_FEATURE	domain:EGF-like 19	3	0.447761	0.0260732	TNXB, LRP1, NOTCH4	655	8	20063	11.4865	1	0.901416	36.5348
UP_SEQ_FEATURE	domain:EGF-like 18	3	0.447761	0.0260732	TNXB, LRP1, NOTCH4	655	8	20063	11.4865	1	0.901416	36.5348
UP_SEQ_FEATURE	domain:EGF-like 16	3	0.447761	0.0328084	TNXB, LRP1, NOTCH4	655	9	20063	10.2102	1	0.909555	43.6794
UP_SEQ_FEATURE	domain:EGF-like 4	6	0.895522	0.0428841	TNXB, LRP1, LTBP2, SCUBE3, NOTCH4, JAG2	655	59	20063	3.11497	1	0.931368	52.9678
UP_SEQ_FEATURE	domain:EGF-like 17	3	0.447761	0.0480196	TNXB, LRP1, NOTCH4	655	11	20063	8.35378	1	0.946032	57.127
UP_SEQ_FEATURE	domain:EGF-like 3	6	0.895522	0.102086	EGFLAM, TNXB, LRP1, LDLR, NOTCH4, JAG2	655	76	20063	2.4182	1	0.984652	84.3267
UP_SEQ_FEATURE	domain:EGF-like 10	3	0.447761	0.104561	TNXB, LRP1, NOTCH4	655	17	20063	5.40539	1	0.982581	85.0538
UP_SEQ_FEATURE	domain:EGF-like 6	4	0.597015	0.172338	TNXB, LRP1, SCUBE3, NOTCH4	655	44	20063	2.78459	1	0.996913	96.1431
UP_SEQ_FEATURE	domain:EGF-like 5	3	0.447761	0.399695	TNXB, LRP1, SCUBE3	655	42	20063	2.1879	1	0.999927	99.9847
Annotation Cluster 27	Enrichment Score: 1.157525127311806
Category	Term	Count	%	PValue	Genes	List Total	Pop Hits	Pop Total	Fold Enrichment	Bonferroni	Benjamini	FDR
UP_SEQ_FEATURE	domain:Leucine-zipper	9	1.34328	0.0315723	BACH1, BATF, E2F1, MAFF, FOS, BACH2, MLLT6, NFIL3, GRAMD4	655	113	20063	2.4396	1	0.908973	42.4276
INTERPRO	IPR004827:Basic-leucine zipper domain	6	0.895522	0.0364416	BACH1, BATF, MAFF, FOS, BACH2, NFIL3	634	54	18559	3.25254	1	0.794541	44.9556
SMART	SM00338:BRLZ	6	0.895522	0.0437694	BACH1, BATF, MAFF, FOS, BACH2, NFIL3	384	51	10057	3.08119	0.999994	0.66665	44.4819
INTERPRO	IPR004826:Basic leucine zipper domain, Maf-type	3	0.447761	0.0706634	BACH1, MAFF, BACH2	634	13	18559	6.75528	1	0.934189	69.2296
INTERPRO	IPR008917:Eukaryotic transcription factor, Skn-1-like, DNA-binding	3	0.447761	0.112793	BACH1, MAFF, BACH2	634	17	18559	5.1658	1	0.962362	85.4088
UP_SEQ_FEATURE	DNA-binding region:Basic motif	8	1.19403	0.282681	BACH1, BATF, MAFF, FOS, BACH2, ARNTL2, NFIL3, TCF23	655	163	20063	1.50334	1	0.999463	99.6713
Annotation Cluster 28	Enrichment Score: 1.1512133432820244
Category	Term	Count	%	PValue	Genes	List Total	Pop Hits	Pop Total	Fold Enrichment	Bonferroni	Benjamini	FDR
KEGG_PATHWAY	hsa05219:Bladder cancer	6	0.895522	0.0161506	E2F1, EGFR, DAPK2, DAPK3, SRC, DAPK1	254	41	6910	3.98118	0.984009	0.240972	19.1078
INTERPRO	IPR020636:Calcium/calmodulin-dependent/calcium-dependent protein kinase	4	0.597015	0.0688503	MYLK2, DAPK2, DAPK3, DAPK1	634	28	18559	4.18184	1	0.935229	68.2497
GOTERM_BP_DIRECT	GO:0046777~protein autophosphorylation	11	1.64179	0.0857329	EGFR, DDR1, BCR, STK24, MYLK2, MINK1, PRKCG, DAPK2, DAPK3, SRC, DAPK1	596	172	16792	1.80186	1	0.958395	79.6071
GOTERM_BP_DIRECT	GO:0010506~regulation of autophagy	4	0.597015	0.260558	OSBPL7, DAPK2, DAPK3, DAPK1	596	50	16792	2.25396	1	0.997051	99.5274
Annotation Cluster 29	Enrichment Score: 1.1482420269805147
Category	Term	Count	%	PValue	Genes	List Total	Pop Hits	Pop Total	Fold Enrichment	Bonferroni	Benjamini	FDR
UP_SEQ_FEATURE	zinc finger region:Phorbol-ester/DAG-type 2	5	0.746269	0.00512513	PRKCA, DGKD, DGKZ, PRKCG, PRKCE	655	22	20063	6.96149	0.999968	0.549424	8.4634
UP_SEQ_FEATURE	zinc finger region:Phorbol-ester/DAG-type 1	5	0.746269	0.00512513	PRKCA, DGKD, DGKZ, PRKCG, PRKCE	655	22	20063	6.96149	0.999968	0.549424	8.4634
INTERPRO	IPR002219:Protein kinase C-like, phorbol ester/diacylglycerol binding	7	1.04478	0.0247971	PRKCA, DGKD, DGKZ, AKAP13, MYO9B, PRKCG, PRKCE	634	66	18559	3.1047	1	0.731175	33.2245
SMART	SM00109:C1	7	1.04478	0.0367142	PRKCA, DGKD, DGKZ, AKAP13, MYO9B, PRKCG, PRKCE	384	65	10057	2.82047	0.999959	0.635759	38.848
KEGG_PATHWAY	hsa04070:Phosphatidylinositol signaling system	8	1.19403	0.0672127	PRKCA, DGKD, SYNJ2, DGKZ, PRKCG, INPP4A, ITPK1, CALM1	254	98	6910	2.22079	1	0.456327	59.592
INTERPRO	IPR017892:Protein kinase, C-terminal	4	0.597015	0.0812344	PRKCA, SGK2, PRKCG, PRKCE	634	30	18559	3.90305	1	0.943197	74.4006
KEGG_PATHWAY	hsa04666:Fc gamma R-mediated phagocytosis	7	1.04478	0.0866558	PRKCA, MYO10, CRKL, ASAP2, PRKCG, ASAP3, PRKCE	254	84	6910	2.26706	1	0.512992	69.2866
GOTERM_MF_DIRECT	GO:0004697~protein kinase C activity	3	0.447761	0.0951418	PRKCA, PRKCG, PRKCE	592	15	16881	5.70304	1	0.909484	78.7836
UP_SEQ_FEATURE	domain:AGC-kinase C-terminal	5	0.746269	0.109342	PRKCA, MAST4, SGK2, PRKCG, PRKCE	655	56	20063	2.73487	1	0.983386	86.3694
GOTERM_BP_DIRECT	GO:0030168~platelet activation	8	1.19403	0.114118	PRKCA, DGKD, ARRB1, GNA12, DGKZ, PRKCG, PRKCE, SRC	596	115	16792	1.95996	1	0.971953	88.3452
INTERPRO	IPR000961:AGC-kinase, C-terminal	5	0.746269	0.123429	PRKCA, MAST4, SGK2, PRKCG, PRKCE	634	56	18559	2.61365	1	0.96298	87.9813
KEGG_PATHWAY	hsa04071:Sphingolipid signaling pathway	8	1.19403	0.150047	PRKCA, RAC3, GNA12, MAPK8, PRKCG, SGMS1, PRKCE, PPP2R2B	254	120	6910	1.81365	1	0.576959	87.964
INTERPRO	IPR020454:Diacylglycerol/phorbol-ester binding	3	0.447761	0.209233	PRKCA, PRKCG, PRKCE	634	25	18559	3.51274	1	0.991973	97.7074
SMART	SM00133:S_TK_X	4	0.597015	0.296764	PRKCA, SGK2, PRKCG, PRKCE	384	50	10057	2.09521	1	0.970419	99.0235
KEGG_PATHWAY	hsa04530:Tight junction	7	1.04478	0.386848	PRKCA, CLDN7, PARD3, PRKCG, PRKCE, PPP2R2B, SRC	254	137	6910	1.39002	1	0.744696	99.8288
Annotation Cluster 30	Enrichment Score: 1.1430985144158932
Category	Term	Count	%	PValue	Genes	List Total	Pop Hits	Pop Total	Fold Enrichment	Bonferroni	Benjamini	FDR
UP_KEYWORDS	Biological rhythms	10	1.49254	0.0191923	RAI1, CRY2, CSNK1D, CSNK1E, MAPK8, PRKCG, ARNTL2, NFKB2, NFIL3, LGR4	660	125	20581	2.49467	0.999488	0.223199	23.6164
GOTERM_BP_DIRECT	GO:0042752~regulation of circadian rhythm	5	0.746269	0.0948552	CRY2, CSNK1D, CSNK1E, MAPK8, PRKCG	596	49	16792	2.87495	1	0.963538	82.9303
KEGG_PATHWAY	hsa04710:Circadian rhythm	4	0.597015	0.102919	CRY2, CSNK1D, CSNK1E, PRKAG2	254	31	6910	3.51029	1	0.498256	75.6942
GOTERM_BP_DIRECT	GO:0032922~circadian regulation of gene expression	5	0.746269	0.142865	RAI1, CRY2, CSNK1D, CSNK1E, LGR4	596	57	16792	2.47145	1	0.98252	93.5081
Annotation Cluster 31	Enrichment Score: 1.0892952030579024
Category	Term	Count	%	PValue	Genes	List Total	Pop Hits	Pop Total	Fold Enrichment	Bonferroni	Benjamini	FDR
KEGG_PATHWAY	hsa04146:Peroxisome	8	1.19403	0.0317542	IDH2, DHRS4L1, GNPAT, PEX14, HMGCL, ACSL6, SLC25A17, ACOX3	254	83	6910	2.62214	0.999724	0.323149	34.3121
UP_KEYWORDS	Peroxisome	7	1.04478	0.0911463	GNPAT, PEX14, SYT7, HMGCL, ACSL6, SLC25A17, ACOX3	660	97	20581	2.25034	1	0.512576	73.5157
GOTERM_CC_DIRECT	GO:0005778~peroxisomal membrane	5	0.746269	0.108696	GNPAT, PEX14, SYT7, ACSL6, SLC25A17	616	54	18224	2.7393	1	0.644995	80.1714
GOTERM_CC_DIRECT	GO:0005777~peroxisome	7	1.04478	0.139659	IDH2, GNPAT, PEX14, SYT7, HMGCL, SLC25A17, ACOX3	616	104	18224	1.99126	1	0.698977	87.9393
Annotation Cluster 32	Enrichment Score: 1.0579218471660907
Category	Term	Count	%	PValue	Genes	List Total	Pop Hits	Pop Total	Fold Enrichment	Bonferroni	Benjamini	FDR
UP_SEQ_FEATURE	short sequence motif:SH3-binding	6	0.895522	0.0377853	TP53BP2, CNTNAP1, SIRPA, AFAP1, SHANK2, DOCK4	655	57	20063	3.22427	1	0.924955	48.4644
GOTERM_MF_DIRECT	GO:0017124~SH3 domain binding	8	1.19403	0.124245	GPX1, DAB2IP, TP53BP2, CNTNAP1, AFAP1L2, SIRPA, SHANK2, DOCK4	592	119	16881	1.91699	1	0.926329	87.221
UP_KEYWORDS	SH3-binding	5	0.746269	0.142769	TP53BP2, CNTNAP1, SIRPA, SHANK2, DOCK4	660	63	20581	2.47487	1	0.582276	88.2527
Annotation Cluster 33	Enrichment Score: 1.0558183911294423
Category	Term	Count	%	PValue	Genes	List Total	Pop Hits	Pop Total	Fold Enrichment	Bonferroni	Benjamini	FDR
GOTERM_CC_DIRECT	GO:0005923~bicellular tight junction	9	1.34328	0.0375155	CLDN7, C1QTNF5, PARD3, CCDC85C, ANK3, TGFBR1, FRMPD2, MPP7, SYNPO	616	113	18224	2.35628	1	0.450668	41.5895
UP_KEYWORDS	Tight junction	7	1.04478	0.057686	CLDN7, PARD3, CCDC85C, TGFBR1, FRMPD2, MPP7, SYNPO	660	86	20581	2.53818	1	0.417413	56.2204
GOTERM_BP_DIRECT	GO:0070830~bicellular tight junction assembly	3	0.447761	0.314241	PARD3, FRMPD2, MPP7	596	32	16792	2.64136	1	0.998454	99.8759
Annotation Cluster 34	Enrichment Score: 0.9963260979629729
Category	Term	Count	%	PValue	Genes	List Total	Pop Hits	Pop Total	Fold Enrichment	Bonferroni	Benjamini	FDR
GOTERM_CC_DIRECT	GO:0031463~Cul3-RING ubiquitin ligase complex	6	0.895522	0.0754924	BACH1, CUL3, KLHL29, BACH2, KBTBD3, TNFAIP1	616	67	18224	2.64935	1	0.546403	66.8373
INTERPRO	IPR000210:BTB/POZ-like	11	1.64179	0.089167	BACH1, KLHL29, NACC1, BACH2, KBTBD3, RHOBTB2, ZBTB4, RHOBTB1, BCL6, TNFAIP1, BTBD9	634	180	18559	1.7889	1	0.949514	77.733
UP_SEQ_FEATURE	domain:BTB	9	1.34328	0.0991663	BACH1, KLHL29, NACC1, BACH2, KBTBD3, ZBTB4, BCL6, TNFAIP1, BTBD9	655	144	20063	1.91441	1	0.985197	83.4261
INTERPRO	IPR011333:BTB/POZ fold	11	1.64179	0.11609	BACH1, KLHL29, NACC1, BACH2, KBTBD3, RHOBTB2, ZBTB4, RHOBTB1, BCL6, TNFAIP1, BTBD9	634	190	18559	1.69475	1	0.963231	86.2566
SMART	SM00225:BTB	11	1.64179	0.134618	BACH1, KLHL29, NACC1, BACH2, KBTBD3, RHOBTB2, ZBTB4, RHOBTB1, BCL6, TNFAIP1, BTBD9	384	176	10057	1.63688	1	0.844163	85.0584
Annotation Cluster 35	Enrichment Score: 0.9766510577257852
Category	Term	Count	%	PValue	Genes	List Total	Pop Hits	Pop Total	Fold Enrichment	Bonferroni	Benjamini	FDR
KEGG_PATHWAY	hsa04925:Aldosterone synthesis and secretion	11	1.64179	0.000688449	PRKCA, ADCY3, HSD3B1, PDE2A, LDLR, NPR1, SCARB1, PRKCG, PRKCE, CACNA1C, CALM1	254	81	6910	3.69447	0.160481	0.0837473	0.892892
BIOCARTA	h_mef2dPathway:Role of MEF2D in T-cell Apoptosis	6	0.895522	0.0013188	PRKCA, MEF2D, PPP3CC, CAPN2, NFATC1, CALM1	81	18	1625	6.68724	0.222799	0.222799	1.62819
KEGG_PATHWAY	hsa04921:Oxytocin signaling pathway	15	2.23881	0.00187041	PRKCA, ADCY3, EGFR, PRKAG2, NPR1, MYLK2, PRKCG, CACNA2D3, SRC, FOS, PPP3CC, CACNA1C, PLA2G4E, NFATC1, CALM1	254	158	6910	2.58273	0.378444	0.0907234	2.40871
KEGG_PATHWAY	hsa04270:Vascular smooth muscle contraction	11	1.64179	0.0116088	PRKCA, ADCY3, KCNMA1, GNA12, MYLK2, NPR1, PRKCG, PRKCE, CACNA1C, PLA2G4E, CALM1	254	119	6910	2.51472	0.948486	0.236335	14.1073
KEGG_PATHWAY	hsa04911:Insulin secretion	9	1.34328	0.0122124	PRKCA, ADCY3, TRPM4, KCNMA1, STX1A, KCNN3, SLC2A1, PRKCG, CACNA1C	254	85	6910	2.8805	0.955888	0.213435	14.7878
KEGG_PATHWAY	hsa05110:Vibrio cholerae infection	7	1.04478	0.0123303	PRKCA, ADCY3, PRKCG, ATP6V1G2, PDIA4, KCNQ1, SEC61A1	254	53	6910	3.59308	0.957207	0.201562	14.9203
BIOCARTA	h_tcrPathway:T Cell Receptor Signaling Pathway	7	1.04478	0.0185564	PRKCA, FOS, CD247, PPP3CC, MAPK8, NFATC1, CALM1	81	44	1625	3.19164	0.972057	0.591145	20.7846
BIOCARTA	h_at1rPathway:Angiotensin II mediated activation of JNK Pathway via Pyk2 dependent signaling	6	0.895522	0.0204295	PRKCA, EGFR, MEF2D, MAPK8, SRC, CALM1	81	33	1625	3.64759	0.980599	0.545469	22.6449
BIOCARTA	h_bcrPathway:BCR Signaling Pathway	6	0.895522	0.0230483	PRKCA, FOS, PPP3CC, MAPK8, NFATC1, CALM1	81	34	1625	3.54031	0.988365	0.523979	25.1784
KEGG_PATHWAY	hsa05031:Amphetamine addiction	7	1.04478	0.0330206	PRKCA, FOS, STX1A, PPP3CC, PRKCG, CACNA1C, CALM1	254	66	6910	2.88535	0.999802	0.321366	35.4223
BIOCARTA	h_pyk2Pathway:Links between Pyk2 and Map Kinases	5	0.746269	0.0452968	PRKCA, CRKL, MAPK8, SRC, CALM1	81	28	1625	3.58245	0.999857	0.669358	43.8209
BIOCARTA	h_ccr5Pathway:Pertussis toxin-insensitive CCR5 Signaling in Macrophage	4	0.597015	0.0474423	PRKCA, FOS, MAPK8, CALM1	81	17	1625	4.72041	0.999907	0.643527	45.3714
KEGG_PATHWAY	hsa04971:Gastric acid secretion	7	1.04478	0.0502227	PRKCA, ADCY3, SSTR2, MYLK2, PRKCG, KCNQ1, CALM1	254	73	6910	2.60867	0.999998	0.40757	48.8837
BIOCARTA	h_hdacPathway:Control of skeletal myogenesis by HDAC & calcium/calmodulin-dependent kinase (CaMK)	5	0.746269	0.050636	MEF2D, PPP3CC, MAP2K6, NFATC1, CALM1	81	29	1625	3.45892	0.999951	0.629349	47.6066
KEGG_PATHWAY	hsa04724:Glutamatergic synapse	9	1.34328	0.0570776	PRKCA, ADCY3, SLC1A3, PPP3CC, PRKCG, CACNA1C, SHANK2, PLA2G4E, GNG7	254	114	6910	2.14774	1	0.424713	53.4853
BIOCARTA	h_calcineurinPathway:Effects of calcineurin in Keratinocyte Differentiation	4	0.597015	0.0630216	PRKCA, PPP3CC, NFATC1, CALM1	81	19	1625	4.22352	0.999996	0.677059	55.5028
BIOCARTA	h_gpcrPathway:Signaling Pathway from G-Protein Families	5	0.746269	0.0822516	PRKCA, FOS, PPP3CC, NFATC1, CALM1	81	34	1625	2.95025	1	0.716649	65.6202
KEGG_PATHWAY	hsa04728:Dopaminergic synapse	9	1.34328	0.0968347	PRKCA, FOS, PPP3CC, MAPK8, PRKCG, PPP2R2B, CACNA1C, GNG7, CALM1	254	128	6910	1.91283	1	0.532743	73.4576
BIOCARTA	h_fcer1Pathway:Fc Epsilon Receptor I Signaling in Mast Cells	5	0.746269	0.121554	FOS, PPP3CC, MAPK8, NFATC1, CALM1	81	39	1625	2.57202	1	0.766856	80.0542
KEGG_PATHWAY	hsa04713:Circadian entrainment	7	1.04478	0.134363	PRKCA, ADCY3, FOS, PRKCG, CACNA1C, GNG7, CALM1	254	95	6910	2.00456	1	0.573574	84.7279
KEGG_PATHWAY	hsa04650:Natural killer cell mediated cytotoxicity	8	1.19403	0.159282	PRKCA, CSF2, TNFRSF10C, RAC3, CD247, PPP3CC, PRKCG, NFATC1	254	122	6910	1.78392	1	0.585787	89.5602
KEGG_PATHWAY	hsa04916:Melanogenesis	7	1.04478	0.159447	PRKCA, ADCY3, WNT10B, MC1R, PRKCG, WNT9A, CALM1	254	100	6910	1.90433	1	0.578977	89.5868
KEGG_PATHWAY	hsa04727:GABAergic synapse	6	0.895522	0.199984	PRKCA, ADCY3, PRKCG, CACNA1C, SRC, GNG7	254	85	6910	1.92033	1	0.636517	94.5296
KEGG_PATHWAY	hsa04924:Renin secretion	5	0.746269	0.206259	KCNMA1, PPP3CC, NPR1, CACNA1C, CALM1	254	64	6910	2.12537	1	0.642765	95.0628
KEGG_PATHWAY	hsa05214:Glioma	5	0.746269	0.213972	PRKCA, E2F1, EGFR, PRKCG, CALM1	254	65	6910	2.09267	1	0.645307	95.6524
KEGG_PATHWAY	hsa04725:Cholinergic synapse	7	1.04478	0.220882	PRKCA, ADCY3, FOS, PRKCG, CACNA1C, KCNQ1, GNG7	254	111	6910	1.71561	1	0.646294	96.1247
KEGG_PATHWAY	hsa04720:Long-term potentiation	5	0.746269	0.221763	PRKCA, PPP3CC, PRKCG, CACNA1C, CALM1	254	66	6910	2.06096	1	0.641978	96.1814
KEGG_PATHWAY	hsa05032:Morphine addiction	6	0.895522	0.240027	PRKCA, ADCY3, PDE2A, ARRB1, PRKCG, GNG7	254	91	6910	1.79372	1	0.669319	97.1972
KEGG_PATHWAY	hsa04918:Thyroid hormone synthesis	5	0.746269	0.253621	PRKCA, ADCY3, GPX1, PRKCG, PDIA4	254	70	6910	1.94319	1	0.675596	97.7844
BIOCARTA	h_fmlpPathway:fMLP induced chemokine gene expression in HMC-1 cells	4	0.597015	0.27313	PPP3CC, MAP2K6, NFATC1, CALM1	81	37	1625	2.16884	1	0.912597	98.1094
BIOCARTA	h_nfatPathway:NFAT and Hypertrophy of the heart (Transcription in the broken heart)	5	0.746269	0.273292	PPP3CC, MAPK8, FGF2, NFATC1, CALM1	81	54	1625	1.85757	1	0.904164	98.1146
BIOCARTA	h_nos1Pathway:Nitric Oxide Signaling Pathway	3	0.447761	0.295559	PRKCA, PPP3CC, CALM1	81	22	1625	2.73569	1	0.900488	98.7198
KEGG_PATHWAY	hsa04723:Retrograde endocannabinoid signaling	6	0.895522	0.310773	PRKCA, ADCY3, MAPK8, PRKCG, CACNA1C, GNG7	254	101	6910	1.61612	1	0.697793	99.2149
BIOCARTA	h_pgc1aPathway:Regulation of PGC-1a	3	0.447761	0.332669	MEF2D, PPP3CC, CALM1	81	24	1625	2.50772	1	0.923855	99.347
BIOCARTA	h_vipPathway:Neuropeptides VIP and PACAP inhibit the apoptosis of activated T cells	3	0.447761	0.369238	PPP3CC, NFATC1, CALM1	81	26	1625	2.31481	1	0.941533	99.6761
KEGG_PATHWAY	hsa04970:Salivary secretion	5	0.746269	0.386817	PRKCA, ADCY3, KCNMA1, PRKCG, CALM1	254	86	6910	1.58167	1	0.748503	99.8287
GOTERM_BP_DIRECT	GO:0007190~activation of adenylate cyclase activity	3	0.447761	0.416877	PRKCA, ADCY3, CALM1	596	40	16792	2.11309	1	0.999442	99.993
KEGG_PATHWAY	hsa04972:Pancreatic secretion	5	0.746269	0.444948	PRKCA, ADCY3, KCNMA1, PRKCG, KCNQ1	254	93	6910	1.46262	1	0.775814	99.9532
KEGG_PATHWAY	hsa04662:B cell receptor signaling pathway	4	0.597015	0.466065	FOS, RAC3, PPP3CC, NFATC1	254	69	6910	1.57709	1	0.784006	99.9718
KEGG_PATHWAY	hsa04020:Calcium signaling pathway	8	1.19403	0.484637	PRKCA, ADCY3, EGFR, PPP3CC, MYLK2, PRKCG, CACNA1C, CALM1	254	179	6910	1.21585	1	0.792697	99.9822
KEGG_PATHWAY	hsa05133:Pertussis	4	0.597015	0.521905	FOS, C4BPB, MAPK8, CALM1	254	75	6910	1.45092	1	0.815228	99.9933
KEGG_PATHWAY	hsa04660:T cell receptor signaling pathway	5	0.746269	0.524726	CSF2, FOS, CD247, PPP3CC, NFATC1	254	103	6910	1.32062	1	0.814922	99.9938
BIOCARTA	h_biopeptidesPathway:Bioactive Peptide Induced Signaling Pathway	3	0.447761	0.567099	PRKCA, MAPK8, CALM1	81	38	1625	1.58382	1	0.986727	99.997
KEGG_PATHWAY	hsa04726:Serotonergic synapse	5	0.746269	0.584404	PRKCA, PRKCG, CACNA1C, PLA2G4E, GNG7	254	111	6910	1.22544	1	0.844097	99.9989
KEGG_PATHWAY	hsa05010:Alzheimer's disease	6	0.895522	0.743097	LRP1, PPP3CC, CAPN2, CACNA1C, GAPDH, CALM1	254	168	6910	0.971597	1	0.923932	100
GOTERM_BP_DIRECT	GO:0038095~Fc-epsilon receptor signaling pathway	5	0.746269	0.880001	FOS, MAPK8, PSME4, NFATC1, CALM1	596	178	16792	0.791418	1	1	100
Annotation Cluster 36	Enrichment Score: 0.9136085324102722
Category	Term	Count	%	PValue	Genes	List Total	Pop Hits	Pop Total	Fold Enrichment	Bonferroni	Benjamini	FDR
GOTERM_BP_DIRECT	GO:0007179~transforming growth factor beta receptor signaling pathway	9	1.34328	0.0163068	FOS, PARD3, ACVRL1, LTBP2, TGFBR1, TGFBR3, SKI, SRC, PXN	596	92	16792	2.7562	1	0.79779	25.2969
GOTERM_MF_DIRECT	GO:0005024~transforming growth factor beta-activated receptor activity	3	0.447761	0.0228602	ACVRL1, TGFBR1, TGFBR3	592	7	16881	12.2208	1	0.713559	30.136
GOTERM_MF_DIRECT	GO:0050431~transforming growth factor beta binding	3	0.447761	0.106303	ACVRL1, TGFBR1, TGFBR3	592	16	16881	5.3466	1	0.917315	82.4983
GOTERM_MF_DIRECT	GO:0046332~SMAD binding	4	0.597015	0.190073	ACVRL1, TGFBR1, TGFBR3, SKI	592	43	16881	2.65258	1	0.95453	96.1962
GOTERM_BP_DIRECT	GO:0030509~BMP signaling pathway	5	0.746269	0.282922	ACVRL1, DLX5, TGFBR3, SKI, SLC39A5	596	76	16792	1.85359	1	0.997572	99.7259
GOTERM_BP_DIRECT	GO:0060021~palate development	5	0.746269	0.282922	TGFBR1, DLX5, INSIG1, TGFBR3, SKI	596	76	16792	1.85359	1	0.997572	99.7259
GOTERM_BP_DIRECT	GO:0030512~negative regulation of transforming growth factor beta receptor signaling pathway	3	0.447761	0.667565	TGFBR1, TGFBR3, SKI	596	64	16792	1.32068	1	0.999987	100
Annotation Cluster 37	Enrichment Score: 0.8981252397917786
Category	Term	Count	%	PValue	Genes	List Total	Pop Hits	Pop Total	Fold Enrichment	Bonferroni	Benjamini	FDR
BIOCARTA	h_at1rPathway:Angiotensin II mediated activation of JNK Pathway via Pyk2 dependent signaling	6	0.895522	0.0204295	PRKCA, EGFR, MEF2D, MAPK8, SRC, CALM1	81	33	1625	3.64759	0.980599	0.545469	22.6449
KEGG_PATHWAY	hsa04012:ErbB signaling pathway	7	1.04478	0.0985857	PRKCA, EGFR, CRKL, GAB1, MAPK8, PRKCG, SRC	254	87	6910	2.18889	1	0.519197	74.1201
BIOCARTA	h_cblPathway:CBL mediated ligand-induced downregulation of EGF receptors	3	0.447761	0.131462	PRKCA, EGFR, SRC	81	13	1625	4.62963	1	0.775878	82.6791
BIOCARTA	h_agrPathway:Agrin in Postsynaptic Differentiation	4	0.597015	0.27313	EGFR, MAPK8, SRC, PXN	81	37	1625	2.16884	1	0.912597	98.1094
KEGG_PATHWAY	hsa05120:Epithelial cell signaling in Helicobacter pylori infection	4	0.597015	0.44682	EGFR, MAPK8, ATP6V1G2, SRC	254	67	6910	1.62416	1	0.774396	99.9552
Annotation Cluster 38	Enrichment Score: 0.8918743516088636
Category	Term	Count	%	PValue	Genes	List Total	Pop Hits	Pop Total	Fold Enrichment	Bonferroni	Benjamini	FDR
GOTERM_BP_DIRECT	GO:0071222~cellular response to lipopolysaccharide	9	1.34328	0.0475749	LCN2, CSF2, DAB2IP, SBNO2, ZC3H12A, MAPK8, ANKRD1, SGMS1, SRC	596	113	16792	2.24399	1	0.922622	57.8806
GOTERM_BP_DIRECT	GO:0071356~cellular response to tumor necrosis factor	8	1.19403	0.0958388	LCN2, TNFRSF21, HDAC4, DAB2IP, TRPV1, ZC3H12A, ANKRD1, SGMS1	596	110	16792	2.04905	1	0.961802	83.2564
GOTERM_BP_DIRECT	GO:0071347~cellular response to interleukin-1	4	0.597015	0.462869	LCN2, DAB2IP, ZC3H12A, ANKRD1	596	71	16792	1.5873	1	0.999725	99.9984
Annotation Cluster 39	Enrichment Score: 0.890312884505091
Category	Term	Count	%	PValue	Genes	List Total	Pop Hits	Pop Total	Fold Enrichment	Bonferroni	Benjamini	FDR
UP_KEYWORDS	Coated pit	5	0.746269	0.080007	SH3BP4, LRP1, LDLR, AP2A1, ARRB1	660	51	20581	3.05719	1	0.50029	68.6283
UP_KEYWORDS	Endocytosis	8	1.19403	0.0940009	SH3BP4, LRP1, LDLR, AP2A1, DGKD, CLEC9A, LRP8, DNM1	660	121	20581	2.06171	1	0.510702	74.6489
GOTERM_CC_DIRECT	GO:0005905~clathrin-coated pit	4	0.597015	0.283662	SH3BP4, LRP1, LDLR, ARRB1	616	55	18224	2.15159	1	0.843823	99.0822
Annotation Cluster 40	Enrichment Score: 0.8736873097376009
Category	Term	Count	%	PValue	Genes	List Total	Pop Hits	Pop Total	Fold Enrichment	Bonferroni	Benjamini	FDR
UP_KEYWORDS	FAD	9	1.34328	0.0250565	RNLS, STEAP4, D2HGDH, CRY2, MICAL2, PYROXD1, SMOX, ACOX3, DHCR24	660	110	20581	2.55136	0.999951	0.253098	29.7261
UP_KEYWORDS	Flavoprotein	9	1.34328	0.0424917	RNLS, STEAP4, D2HGDH, CRY2, MICAL2, PYROXD1, SMOX, ACOX3, DHCR24	660	122	20581	2.30041	1	0.332508	45.3178
GOTERM_MF_DIRECT	GO:0071949~FAD binding	3	0.447761	0.191722	D2HGDH, CRY2, MICAL2	592	23	16881	3.71937	1	0.953513	96.3145
INTERPRO	IPR023753:Pyridine nucleotide-disulphide oxidoreductase, FAD/NAD(P)-binding domain	4	0.597015	0.317277	RNLS, MICAL2, PYROXD1, SMOX	634	58	18559	2.01882	1	0.998118	99.7841
GOTERM_MF_DIRECT	GO:0050660~flavin adenine dinucleotide binding	3	0.447761	0.661042	D2HGDH, ACOX3, DHCR24	592	64	16881	1.33665	1	0.999332	100
Annotation Cluster 41	Enrichment Score: 0.8735403674564863
Category	Term	Count	%	PValue	Genes	List Total	Pop Hits	Pop Total	Fold Enrichment	Bonferroni	Benjamini	FDR
INTERPRO	IPR011511:Variant SH3	7	1.04478	0.0174514	SH3BP4, CRKL, RIMBP3C, RIMBP2, MPP7, SHANK2, DOCK4	634	61	18559	3.35918	1	0.636942	24.6589
UP_SEQ_FEATURE	domain:SH3 1	3	0.447761	0.364647	CRKL, RIMBP3C, RIMBP2	655	39	20063	2.35619	1	0.999873	99.9593
UP_SEQ_FEATURE	domain:SH3 2	3	0.447761	0.376423	CRKL, RIMBP3C, RIMBP2	655	40	20063	2.29729	1	0.999885	99.9705
Annotation Cluster 42	Enrichment Score: 0.8712284943401936
Category	Term	Count	%	PValue	Genes	List Total	Pop Hits	Pop Total	Fold Enrichment	Bonferroni	Benjamini	FDR
INTERPRO	IPR011029:Death-like domain	9	1.34328	0.0149523	IRAK2, TNFRSF21, PEA15, CARD9, ANK3, NFKB2, DLG5, NLRP1, DAPK1	634	94	18559	2.80272	1	0.618383	21.5172
UP_SEQ_FEATURE	domain:Death	5	0.746269	0.0263228	IRAK2, TNFRSF21, ANK3, NFKB2, DAPK1	655	35	20063	4.37579	1	0.893738	36.8141
INTERPRO	IPR000488:Death domain	5	0.746269	0.0304047	IRAK2, TNFRSF21, ANK3, NFKB2, DAPK1	634	35	18559	4.18184	1	0.772541	39.1392
SMART	SM00005:DEATH	4	0.597015	0.0816897	TNFRSF21, ANK3, NFKB2, DAPK1	384	27	10057	3.88002	1	0.829659	67.3878
UP_KEYWORDS	ANK repeat	14	2.08955	0.083367	ANKRD9, TP53BP2, TRPV1, ASAP2, ASAP3, NFKB2, ANKRD1, SHANK2, DAPK1, ANK3, NOTCH4, ANKRD11, TRPV4, DGKZ	660	264	20581	1.65366	1	0.50073	70.1842
INTERPRO	IPR002110:Ankyrin repeat	14	2.08955	0.0982248	ANKRD9, TP53BP2, TRPV1, ASAP2, ASAP3, NFKB2, ANKRD1, SHANK2, DAPK1, ANK3, NOTCH4, ANKRD11, TRPV4, DGKZ	634	255	18559	1.60714	1	0.948955	81.0393
UP_SEQ_FEATURE	repeat:ANK 1	13	1.9403	0.104174	ANKRD9, TP53BP2, TRPV1, ASAP2, NFKB2, ANKRD1, ASAP3, DAPK1, ANK3, ANKRD11, NOTCH4, TRPV4, DGKZ	655	244	20063	1.63195	1	0.983576	84.9422
UP_SEQ_FEATURE	repeat:ANK 2	13	1.9403	0.10609	ANKRD9, TP53BP2, TRPV1, ASAP2, NFKB2, ANKRD1, ASAP3, DAPK1, ANK3, ANKRD11, NOTCH4, TRPV4, DGKZ	655	245	20063	1.62529	1	0.982392	85.4869
INTERPRO	IPR020683:Ankyrin repeat-containing domain	14	2.08955	0.121053	ANKRD9, TP53BP2, TRPV1, ASAP2, ASAP3, NFKB2, ANKRD1, SHANK2, DAPK1, ANK3, NOTCH4, ANKRD11, TRPV4, DGKZ	634	265	18559	1.54649	1	0.963129	87.4466
SMART	SM00248:ANK	13	1.9403	0.238139	TP53BP2, TRPV1, ASAP2, NFKB2, ANKRD1, ASAP3, SHANK2, DAPK1, ANK3, ANKRD11, NOTCH4, TRPV4, DGKZ	384	249	10057	1.36735	1	0.953108	97.2018
UP_SEQ_FEATURE	repeat:ANK 3	9	1.34328	0.364792	ANKRD9, TRPV1, ANK3, NOTCH4, ANKRD11, TRPV4, ANKRD1, NFKB2, DAPK1	655	207	20063	1.33176	1	0.999862	99.9594
UP_SEQ_FEATURE	repeat:ANK 4	7	1.04478	0.480094	TRPV1, ANK3, NOTCH4, ANKRD11, ANKRD1, NFKB2, DAPK1	655	170	20063	1.26126	1	0.99998	99.9987
UP_SEQ_FEATURE	repeat:ANK 5	6	0.895522	0.494508	TRPV1, ANK3, NOTCH4, ANKRD1, NFKB2, DAPK1	655	142	20063	1.29425	1	0.999982	99.9992
UP_SEQ_FEATURE	repeat:ANK 7	3	0.447761	0.613344	ANK3, NFKB2, DAPK1	655	63	20063	1.4586	1	0.999999	100
UP_SEQ_FEATURE	repeat:ANK 6	4	0.597015	0.630553	TRPV1, ANK3, NFKB2, DAPK1	655	99	20063	1.2376	1	0.999999	100
Annotation Cluster 43	Enrichment Score: 0.8489493294440362
Category	Term	Count	%	PValue	Genes	List Total	Pop Hits	Pop Total	Fold Enrichment	Bonferroni	Benjamini	FDR
BIOCARTA	h_metPathway:Signaling of Hepatocyte Growth Factor Receptor	6	0.895522	0.0289188	FOS, CRKL, GAB1, MAPK8, SRC, PXN	81	36	1625	3.34362	0.99632	0.550987	30.5829
BIOCARTA	h_pyk2Pathway:Links between Pyk2 and Map Kinases	5	0.746269	0.0452968	PRKCA, CRKL, MAPK8, SRC, CALM1	81	28	1625	3.58245	0.999857	0.669358	43.8209
KEGG_PATHWAY	hsa05100:Bacterial invasion of epithelial cells	7	1.04478	0.0653462	CRKL, GAB1, DNM1, SRC, PXN, SEPT8, SEPT9	254	78	6910	2.44145	1	0.458298	58.5262
KEGG_PATHWAY	hsa04012:ErbB signaling pathway	7	1.04478	0.0985857	PRKCA, EGFR, CRKL, GAB1, MAPK8, PRKCG, SRC	254	87	6910	2.18889	1	0.519197	74.1201
BIOCARTA	h_gleevecPathway:Inhibition of Cellular Proliferation by Gleevec	4	0.597015	0.100198	FOS, CRKL, BCR, MAPK8	81	23	1625	3.489	1	0.739302	73.1085
BIOCARTA	h_integrinPathway:Integrin Signaling Pathway	5	0.746269	0.104971	CRKL, BCR, MAPK8, SRC, PXN	81	37	1625	2.71104	1	0.733894	74.8301
GOTERM_BP_DIRECT	GO:0007173~epidermal growth factor receptor signaling pathway	5	0.746269	0.136408	EGFR, DGKD, GAB1, SRC, PXN	596	56	16792	2.51558	1	0.980322	92.5838
GOTERM_MF_DIRECT	GO:0005178~integrin binding	7	1.04478	0.162517	EGFR, WISP1, TNXB, LAMA5, COL16A1, SRC, PXN	592	105	16881	1.90101	1	0.94163	93.6093
BIOCARTA	h_agrPathway:Agrin in Postsynaptic Differentiation	4	0.597015	0.27313	EGFR, MAPK8, SRC, PXN	81	37	1625	2.16884	1	0.912597	98.1094
GOTERM_BP_DIRECT	GO:0038128~ERBB2 signaling pathway	3	0.447761	0.391855	EGFR, GAB1, SRC	596	38	16792	2.2243	1	0.999202	99.9853
KEGG_PATHWAY	hsa04722:Neurotrophin signaling pathway	6	0.895522	0.449606	IRAK2, CRKL, GAB1, MAPK8, ARHGDIA, CALM1	254	120	6910	1.36024	1	0.773938	99.9581
KEGG_PATHWAY	hsa05131:Shigellosis	3	0.447761	0.686017	CRKL, MAPK8, SRC	254	64	6910	1.27522	1	0.899614	100
Annotation Cluster 44	Enrichment Score: 0.8384153027062072
Category	Term	Count	%	PValue	Genes	List Total	Pop Hits	Pop Total	Fold Enrichment	Bonferroni	Benjamini	FDR
UP_KEYWORDS	Metal-binding	136	20.2985	0.0339394	ADCY3, PDP2, LMAN2L, S100A9, GNA12, PKMYT1, PDLIM2, SYT7, MKRN2, DYSF, ZNF446, ITPK1, DCTPP1, HMGCL, CDH23, NUDT17, FECH, PDXK, RNF220, RREB1, RXRB, ADAMTS20, STK24, ZNF792, PGM2, PITPNM1, ZNF436, ZC3H3, SIVA1, ARFGAP3, ZNF611, NEK3, ASAP2, AKAP13, MYO9B, ASAP3, ZMYND8, DIDO1, PXN, ARIH2, IDH2, CASZ1, ZNF598, LHX8, UNKL, EWSR1, SCD, TGFBR1, ITGA1, CACNA2D3, MARCH10, HDAC4, ITGA9, NR1I2, B3GAT3, C…	660	3640	20581	1.16509	0.999999	0.299025	38.1225
GOTERM_MF_DIRECT	GO:0008270~zinc ion binding	52	7.76119	0.0604998	RAI1, S100A9, PDLIM2, ZNF346, MMP25, MKRN2, MMP24, MGRN1, PRKCA, PDXK, ZNF282, RNF220, ADAMTS20, RXRB, MICAL2, PRKCG, ZSWIM4, MAN2A2, LIMCH1, ZMIZ1, CHFR, SIVA1, USP5, FHL2, DIDO1, ZMYND8, PXN, CPZ, ARIH2, GATAD2B, ZNF598, LIMD1, LHX8, MLLT6, CHD4, EWSR1, UNKL, BRD1, POLR3K, LMX1B, RBM20, DTX2, TRIM27, SKI, SIRT6, MARCH10, RNF112, HDAC4, NR1I2, KDM4B, PAPPA2, ZNF385A	592	1169	16881	1.26843	1	0.874599	62.0075
UP_KEYWORDS	Zinc	80	11.9403	0.34077	RAI1, S100A9, SOBP, PDLIM2, ZNF346, MMP25, MMP24, MKRN2, MGRN1, ZNF446, PRKCA, RNF220, ZNF282, PDXK, RREB1, ADAMTS20, RXRB, MICAL2, PRKCG, ZNF792, PRKCE, ZSWIM4, MAN2A2, LIMCH1, ZMIZ1, ZFPM1, CHFR, KDM6B, ZNF436, ZC3H3, SIVA1, ZNF611, ARFGAP3, USP5, ASAP2, FHL2, AKAP13, MYO9B, ASAP3, DIDO1, ZMYND8, ZNF175, PXN, CPZ, ARIH2, ZSCAN22, DGKD, CASZ1, PPP3CC, ZC3H12A, GATAD2B, BCL6, LIMD1, SCNM1, ZNF598…	660	2348	20581	1.06246	1	0.791239	99.695
UP_KEYWORDS	Zinc-finger	56	8.35821	0.633022	RAI1, SOBP, ZNF346, MKRN2, MGRN1, ZNF446, PRKCA, ZNF282, RNF220, RXRB, RREB1, ZNF792, PRKCG, PRKCE, ZSWIM4, ZMIZ1, ZFPM1, CHFR, ZNF436, ZC3H3, ARFGAP3, ZNF611, USP5, FHL2, AKAP13, MYO9B, ASAP3, DIDO1, ZMYND8, ZNF175, ARIH2, ZSCAN22, DGKD, CASZ1, GATAD2B, ZC3H12A, BCL6, SCNM1, ZNF598, MLLT6, CHD4, EWSR1, UNKL, BRD1, POLR3K, DTX2, TRIM27, MARCH10, ATMIN, ZNF165, RNF112, NR1I2, KDM4B, ZBTB4, DGKZ, Z…	660	1781	20581	0.980498	1	0.922836	99.9999
Annotation Cluster 45	Enrichment Score: 0.8366918811823238
Category	Term	Count	%	PValue	Genes	List Total	Pop Hits	Pop Total	Fold Enrichment	Bonferroni	Benjamini	FDR
GOTERM_BP_DIRECT	GO:0000045~autophagosome assembly	5	0.746269	0.0562787	PACS2, ATG9B, ATG4D, MAP1LC3B, ATG4B	596	41	16792	3.43591	1	0.930579	64.2105
UP_KEYWORDS	Autophagy	8	1.19403	0.124242	CLEC16A, ATG9B, ATG4D, MAP1LC3B, ATG4B, S100A9, PINK1, RAB12	660	130	20581	1.91897	1	0.56105	84.1864
GOTERM_BP_DIRECT	GO:0000422~mitophagy	4	0.597015	0.126046	ATG9B, ATG4D, ATG4B, PINK1	596	35	16792	3.21994	1	0.976771	90.8363
GOTERM_BP_DIRECT	GO:0006914~autophagy	6	0.895522	0.510611	CLEC16A, ATG4D, MAP1LC3B, ATG4B, S100A9, RAB12	596	133	16792	1.27103	1	0.999831	99.9997
Annotation Cluster 46	Enrichment Score: 0.835481803423887
Category	Term	Count	%	PValue	Genes	List Total	Pop Hits	Pop Total	Fold Enrichment	Bonferroni	Benjamini	FDR
UP_SEQ_FEATURE	domain:VWFC	3	0.447761	0.11519	PXDN, WISP1, JAG2	655	18	20063	5.10509	1	0.98582	87.8303
INTERPRO	IPR001007:von Willebrand factor, type C	4	0.597015	0.163371	PXDN, WISP1, JAG2, VWC2	634	41	18559	2.85589	1	0.983529	94.3231
SMART	SM00214:VWC	4	0.597015	0.165564	PXDN, WISP1, JAG2, VWC2	384	37	10057	2.83136	1	0.891538	90.7431
Annotation Cluster 47	Enrichment Score: 0.8296268822419934
Category	Term	Count	%	PValue	Genes	List Total	Pop Hits	Pop Total	Fold Enrichment	Bonferroni	Benjamini	FDR
UP_SEQ_FEATURE	domain:FERM	5	0.746269	0.07498	MYO10, FRMD6, PLEKHH3, FRMPD2, MSN	655	49	20063	3.12556	1	0.976316	73.8511
INTERPRO	IPR019748:FERM central domain	5	0.746269	0.0955069	MYO10, FRMD6, PLEKHH3, FRMPD2, MSN	634	51	18559	2.86989	1	0.952188	80.099
INTERPRO	IPR019749:Band 4.1 domain	5	0.746269	0.0955069	MYO10, FRMD6, PLEKHH3, FRMPD2, MSN	634	51	18559	2.86989	1	0.952188	80.099
INTERPRO	IPR000299:FERM domain	5	0.746269	0.0955069	MYO10, FRMD6, PLEKHH3, FRMPD2, MSN	634	51	18559	2.86989	1	0.952188	80.099
SMART	SM00295:B41	5	0.746269	0.128468	MYO10, FRMD6, PLEKHH3, FRMPD2, MSN	384	51	10057	2.56766	1	0.843748	83.6003
INTERPRO	IPR018980:FERM, C-terminal PH-like domain	3	0.447761	0.234595	FRMD6, FRMPD2, MSN	634	27	18559	3.25254	1	0.995477	98.6428
INTERPRO	IPR014352:FERM/acyl-CoA-binding protein, 3-helical bundle	4	0.597015	0.242683	MYO10, FRMD6, FRMPD2, MSN	634	50	18559	2.34183	1	0.995585	98.8559
INTERPRO	IPR018979:FERM, N-terminal	3	0.447761	0.260116	FRMD6, FRMPD2, MSN	634	29	18559	3.02823	1	0.996602	99.2134
SMART	SM01196:SM01196	3	0.447761	0.274782	FRMD6, FRMPD2, MSN	384	27	10057	2.91001	1	0.968878	98.5364
Annotation Cluster 48	Enrichment Score: 0.8255163865126368
Category	Term	Count	%	PValue	Genes	List Total	Pop Hits	Pop Total	Fold Enrichment	Bonferroni	Benjamini	FDR
UP_SEQ_FEATURE	domain:Fibronectin type-III 2	9	1.34328	0.0696964	IGDCC3, EGFLAM, TNXB, RIMBP3C, PTPRF, RIMBP2, CSF3R, BOC, FNDC3B	655	133	20063	2.07274	1	0.976159	71.158
UP_SEQ_FEATURE	domain:Fibronectin type-III 1	9	1.34328	0.0721222	IGDCC3, EGFLAM, TNXB, RIMBP3C, PTPRF, RIMBP2, CSF3R, BOC, FNDC3B	655	134	20063	2.05727	1	0.977053	72.4254
INTERPRO	IPR003961:Fibronectin, type III	12	1.79104	0.0979263	FSD1, IGDCC3, EGFLAM, TNXB, RIMBP3C, PTPRF, RIMBP2, OBSL1, CSF3R, PAPPA2, BOC, FNDC3B	634	207	18559	1.69698	1	0.95224	80.9381
SMART	SM00060:FN3	10	1.49254	0.118767	FSD1, IGDCC3, EGFLAM, TNXB, RIMBP3C, PTPRF, RIMBP2, CSF3R, BOC, FNDC3B	384	150	10057	1.74601	1	0.849907	81.0311
UP_SEQ_FEATURE	domain:Fibronectin type-III 3	6	0.895522	0.13921	TNXB, PTPRF, RIMBP2, CSF3R, BOC, FNDC3B	655	84	20063	2.1879	1	0.992378	92.4218
UP_SEQ_FEATURE	domain:Fibronectin type-III 5	4	0.597015	0.188738	TNXB, PTPRF, CSF3R, FNDC3B	655	46	20063	2.66352	1	0.997789	97.267
UP_SEQ_FEATURE	domain:Fibronectin type-III 8	3	0.447761	0.195379	TNXB, PTPRF, FNDC3B	655	25	20063	3.67566	1	0.998096	97.6275
UP_SEQ_FEATURE	domain:Fibronectin type-III 7	3	0.447761	0.195379	TNXB, PTPRF, FNDC3B	655	25	20063	3.67566	1	0.998096	97.6275
UP_SEQ_FEATURE	domain:Fibronectin type-III 6	3	0.447761	0.280333	TNXB, PTPRF, FNDC3B	655	32	20063	2.87161	1	0.999469	99.6523
UP_SEQ_FEATURE	domain:Fibronectin type-III 4	4	0.597015	0.338064	TNXB, PTPRF, CSF3R, FNDC3B	655	63	20063	1.9448	1	0.999776	99.9175
Annotation Cluster 49	Enrichment Score: 0.7953041746456093
Category	Term	Count	%	PValue	Genes	List Total	Pop Hits	Pop Total	Fold Enrichment	Bonferroni	Benjamini	FDR
KEGG_PATHWAY	hsa05230:Central carbon metabolism in cancer	6	0.895522	0.0842024	EGFR, SLC2A1, PGAM1, HK2, HK1, SIRT6	254	64	6910	2.55044	1	0.51359	68.1947
KEGG_PATHWAY	hsa04066:HIF-1 signaling pathway	7	1.04478	0.149178	PRKCA, EGFR, SLC2A1, HK2, HK1, PRKCG, GAPDH	254	98	6910	1.94319	1	0.590184	87.8027
GOTERM_BP_DIRECT	GO:0015758~glucose transport	3	0.447761	0.327386	SLC2A1, HK2, HK1	596	33	16792	2.56132	1	0.998681	99.9119
Annotation Cluster 50	Enrichment Score: 0.7844212194994172
Category	Term	Count	%	PValue	Genes	List Total	Pop Hits	Pop Total	Fold Enrichment	Bonferroni	Benjamini	FDR
UP_SEQ_FEATURE	domain:VWFA	6	0.895522	0.0638439	VWA3B, HMCN1, ITGA1, ANTXR2, ITIH3, CACNA2D3	655	66	20063	2.78459	1	0.972578	67.8709
INTERPRO	IPR002035:von Willebrand factor, type A	6	0.895522	0.236363	VWA3B, HMCN1, ITGA1, ANTXR2, ITIH3, CACNA2D3	634	97	18559	1.81069	1	0.995259	98.6923
SMART	SM00327:VWA	5	0.746269	0.29379	VWA3B, ITGA1, ANTXR2, ITIH3, CACNA2D3	384	72	10057	1.81876	1	0.973008	98.9678
Annotation Cluster 51	Enrichment Score: 0.7616452444015963
Category	Term	Count	%	PValue	Genes	List Total	Pop Hits	Pop Total	Fold Enrichment	Bonferroni	Benjamini	FDR
UP_KEYWORDS	Immunity	23	3.43284	0.0841198	TRPM4, TNFRSF21, DAB2IP, CARD9, POLR3H, POLR3K, S100A9, UNC93B1, C4BPB, PRKCE, HLA-E, LGR4, SRC, NLRP1, TLR9, LCN2, DCLRE1C, SERINC5, ETS1, LTF, ZC3H12A, BCL6, MR1	660	500	20581	1.43443	1	0.496988	70.5228
UP_KEYWORDS	Innate immunity	13	1.9403	0.134529	DAB2IP, POLR3H, CARD9, POLR3K, S100A9, UNC93B1, C4BPB, LGR4, NLRP1, TLR9, LCN2, SERINC5, MR1	660	261	20581	1.55319	1	0.580675	86.5818
GOTERM_BP_DIRECT	GO:0045087~innate immune response	17	2.53731	0.458512	DAB2IP, CARD9, POLR3H, POLR3K, S100A9, TRIM27, UNC93B1, C4BPB, NFKB2, HLA-E, LGR4, SRC, NLRP1, TLR9, LCN2, SERINC5, MR1	596	430	16792	1.11388	1	0.999706	99.9981
Annotation Cluster 52	Enrichment Score: 0.7543168457055006
Category	Term	Count	%	PValue	Genes	List Total	Pop Hits	Pop Total	Fold Enrichment	Bonferroni	Benjamini	FDR
INTERPRO	IPR008984:SMAD/FHA domain	5	0.746269	0.106287	IRF9, PNKP, FOXK1, FOXK2, CHFR	634	53	18559	2.76159	1	0.957344	83.5891
INTERPRO	IPR000253:Forkhead-associated (FHA) domain	4	0.597015	0.131107	PNKP, FOXK1, FOXK2, CHFR	634	37	18559	3.16463	1	0.965607	89.567
SMART	SM00240:FHA	3	0.447761	0.217706	FOXK1, FOXK2, CHFR	384	23	10057	3.4161	1	0.943991	96.0371
UP_SEQ_FEATURE	domain:FHA	3	0.447761	0.316781	FOXK1, FOXK2, CHFR	655	35	20063	2.62547	1	0.999637	99.8579
Annotation Cluster 53	Enrichment Score: 0.7239647308636026
Category	Term	Count	%	PValue	Genes	List Total	Pop Hits	Pop Total	Fold Enrichment	Bonferroni	Benjamini	FDR
SMART	SM00033:CH	6	0.895522	0.106034	MICAL2, LIMCH1, EHBP1, SPTBN1, FLNB, PARVA	384	66	10057	2.38092	1	0.867023	77.0934
INTERPRO	IPR001715:Calponin homology domain	6	0.895522	0.117582	MICAL2, LIMCH1, EHBP1, SPTBN1, FLNB, PARVA	634	76	18559	2.31102	1	0.962078	86.6251
UP_SEQ_FEATURE	domain:CH 1	3	0.447761	0.219447	SPTBN1, FLNB, PARVA	655	27	20063	3.40339	1	0.998606	98.5932
UP_SEQ_FEATURE	domain:CH 2	3	0.447761	0.219447	SPTBN1, FLNB, PARVA	655	27	20063	3.40339	1	0.998606	98.5932
UP_SEQ_FEATURE	domain:CH	3	0.447761	0.399695	MICAL2, LIMCH1, EHBP1	655	42	20063	2.1879	1	0.999927	99.9847
Annotation Cluster 54	Enrichment Score: 0.7175617529573698
Category	Term	Count	%	PValue	Genes	List Total	Pop Hits	Pop Total	Fold Enrichment	Bonferroni	Benjamini	FDR
GOTERM_BP_DIRECT	GO:0042744~hydrogen peroxide catabolic process	3	0.447761	0.156852	GPX1, PXDN, PRDX3	596	20	16792	4.22617	1	0.985953	95.1514
UP_KEYWORDS	Peroxidase	3	0.447761	0.190118	GPX1, PXDN, PRDX3	660	25	20581	3.742	1	0.652516	94.668
GOTERM_BP_DIRECT	GO:0098869~cellular oxidant detoxification	5	0.746269	0.23594	GSTM2, GPX1, PXDN, S100A9, PRDX3	596	70	16792	2.01246	1	0.995634	99.1551
Annotation Cluster 55	Enrichment Score: 0.7009682045934443
Category	Term	Count	%	PValue	Genes	List Total	Pop Hits	Pop Total	Fold Enrichment	Bonferroni	Benjamini	FDR
UP_SEQ_FEATURE	repeat:TNFR-Cys 3	3	0.447761	0.183475	TNFRSF21, TNFRSF10C, RTEL1	655	24	20063	3.82882	1	0.997762	96.9452
UP_SEQ_FEATURE	repeat:TNFR-Cys 1	3	0.447761	0.207376	TNFRSF21, TNFRSF10C, RTEL1	655	26	20063	3.53429	1	0.998512	98.168
UP_SEQ_FEATURE	repeat:TNFR-Cys 2	3	0.447761	0.207376	TNFRSF21, TNFRSF10C, RTEL1	655	26	20063	3.53429	1	0.998512	98.168
Annotation Cluster 56	Enrichment Score: 0.6973566566089182
Category	Term	Count	%	PValue	Genes	List Total	Pop Hits	Pop Total	Fold Enrichment	Bonferroni	Benjamini	FDR
KEGG_PATHWAY	hsa05410:Hypertrophic cardiomyopathy (HCM)	7	1.04478	0.0653462	ITGA9, PRKAG2, LMNA, ITGA1, CACNA2D3, CACNA1C, TPM4	254	78	6910	2.44145	1	0.458298	58.5262
KEGG_PATHWAY	hsa05414:Dilated cardiomyopathy	7	1.04478	0.0866558	ADCY3, ITGA9, LMNA, ITGA1, CACNA2D3, CACNA1C, TPM4	254	84	6910	2.26706	1	0.512992	69.2866
KEGG_PATHWAY	hsa05412:Arrhythmogenic right ventricular cardiomyopathy (ARVC)	5	0.746269	0.261733	ITGA9, LMNA, ITGA1, CACNA2D3, CACNA1C	254	71	6910	1.91583	1	0.672756	98.0783
KEGG_PATHWAY	hsa04261:Adrenergic signaling in cardiomyocytes	8	1.19403	0.286799	PRKCA, ADCY3, CACNA2D3, PPP2R2B, CACNA1C, KCNQ1, TPM4, CALM1	254	146	6910	1.49067	1	0.672063	98.7745
KEGG_PATHWAY	hsa04260:Cardiac muscle contraction	3	0.447761	0.766942	CACNA2D3, CACNA1C, TPM4	254	75	6910	1.08819	1	0.934136	100
Annotation Cluster 57	Enrichment Score: 0.6900110685458442
Category	Term	Count	%	PValue	Genes	List Total	Pop Hits	Pop Total	Fold Enrichment	Bonferroni	Benjamini	FDR
UP_SEQ_FEATURE	metal ion-binding site:Calcium 3	4	0.597015	0.0851671	PRKCA, LRP1, PRKCG, SYT7	655	32	20063	3.82882	1	0.97982	78.3885
UP_SEQ_FEATURE	metal ion-binding site:Calcium 3; via carbonyl oxygen	3	0.447761	0.148521	PRKCA, LRP1, PRKCG	655	21	20063	4.37579	1	0.994186	93.7154
UP_SEQ_FEATURE	metal ion-binding site:Calcium 1	4	0.597015	0.197084	PRKCA, LRP1, PRKCG, SYT7	655	47	20063	2.60685	1	0.998042	97.7125
UP_SEQ_FEATURE	metal ion-binding site:Calcium 1; via carbonyl oxygen	3	0.447761	0.280333	PRKCA, LRP1, PRKCG	655	32	20063	2.87161	1	0.999469	99.6523
UP_SEQ_FEATURE	metal ion-binding site:Calcium 2	4	0.597015	0.284235	PRKCA, LRP1, PRKCG, SYT7	655	57	20063	2.14951	1	0.999444	99.6834
UP_SEQ_FEATURE	metal ion-binding site:Calcium 2; via carbonyl oxygen	3	0.447761	0.364647	PRKCA, LRP1, PRKCG	655	39	20063	2.35619	1	0.999873	99.9593
Annotation Cluster 58	Enrichment Score: 0.6687540466586462
Category	Term	Count	%	PValue	Genes	List Total	Pop Hits	Pop Total	Fold Enrichment	Bonferroni	Benjamini	FDR
GOTERM_MF_DIRECT	GO:0015293~symporter activity	5	0.746269	0.102608	SLC16A13, SLC16A1, SLC1A3, MFSD2A, SLC25A18	592	51	16881	2.79561	1	0.91494	81.3418
UP_KEYWORDS	Symport	7	1.04478	0.154711	SLC16A13, SLC16A1, SLC1A3, SLC17A4, MFSD2A, SLC25A18, SLC34A2	660	113	20581	1.93171	1	0.598581	90.3342
INTERPRO	IPR020846:Major facilitator superfamily domain	7	1.04478	0.331621	SLC16A13, SLC16A1, SLC17A4, SLC2A1, UNC93B1, SV2B, MFSD2A	634	138	18559	1.48486	1	0.998405	99.8466
INTERPRO	IPR011701:Major facilitator superfamily	4	0.597015	0.401457	SLC16A13, SLC16A1, SLC17A4, SV2B	634	67	18559	1.74763	1	0.999118	99.974
Annotation Cluster 59	Enrichment Score: 0.6585041424788302
Category	Term	Count	%	PValue	Genes	List Total	Pop Hits	Pop Total	Fold Enrichment	Bonferroni	Benjamini	FDR
INTERPRO	IPR001965:Zinc finger, PHD-type	7	1.04478	0.0835256	BRD1, RAI1, KDM4B, MLLT6, DIDO1, ZMYND8, CHD4	634	89	18559	2.30236	1	0.943206	75.4083
SMART	SM00249:PHD	7	1.04478	0.123232	BRD1, RAI1, KDM4B, MLLT6, DIDO1, ZMYND8, CHD4	384	89	10057	2.0599	1	0.845701	82.2565
INTERPRO	IPR019786:Zinc finger, PHD-type, conserved site	5	0.746269	0.194818	BRD1, MLLT6, DIDO1, ZMYND8, CHD4	634	67	18559	2.18454	1	0.990957	96.9344
UP_SEQ_FEATURE	zinc finger region:PHD-type	4	0.597015	0.239984	BRD1, RAI1, DIDO1, ZMYND8	655	52	20063	2.35619	1	0.998923	99.1109
UP_SEQ_FEATURE	zinc finger region:PHD-type 2	3	0.447761	0.255933	KDM4B, MLLT6, CHD4	655	30	20063	3.06305	1	0.999174	99.3828
INTERPRO	IPR019787:Zinc finger, PHD-finger	5	0.746269	0.283328	BRD1, MLLT6, DIDO1, ZMYND8, CHD4	634	79	18559	1.85271	1	0.997726	99.5289
UP_SEQ_FEATURE	zinc finger region:PHD-type 1	3	0.447761	0.292514	KDM4B, MLLT6, CHD4	655	33	20063	2.78459	1	0.999493	99.7408
INTERPRO	IPR011011:Zinc finger, FYVE/PHD-type	6	0.895522	0.528507	BRD1, KDM4B, MLLT6, DIDO1, ZMYND8, CHD4	634	141	18559	1.24565	1	0.999889	99.9994
Annotation Cluster 60	Enrichment Score: 0.6044136802856354
Category	Term	Count	%	PValue	Genes	List Total	Pop Hits	Pop Total	Fold Enrichment	Bonferroni	Benjamini	FDR
UP_SEQ_FEATURE	topological domain:Pore forming	3	0.447761	0.0652577	TRPM4, TRPV1, TRPV4	655	13	20063	7.06858	1	0.97218	68.6959
GOTERM_MF_DIRECT	GO:0005262~calcium channel activity	5	0.746269	0.22956	TRPM4, PDE2A, TRPV1, TRPV4, CACNA2D3	592	70	16881	2.0368	1	0.9689	98.2477
GOTERM_BP_DIRECT	GO:0070588~calcium ion transmembrane transport	7	1.04478	0.246731	TRPM4, PDE2A, TRPV1, TRPV4, CACNA2D3, CACNA1C, IL1RAPL1	596	119	16792	1.65732	1	0.996427	99.3435
INTERPRO	IPR005821:Ion transport domain	6	0.895522	0.294962	TRPM4, KCNMA1, TRPV1, TRPV4, CACNA1C, KCNQ1	634	106	18559	1.65695	1	0.997746	99.6379
UP_KEYWORDS	Calcium channel	4	0.597015	0.354476	TRPV1, TRPV4, CACNA2D3, CACNA1C	660	66	20581	1.8899	1	0.801011	99.7723
UP_KEYWORDS	Calcium transport	4	0.597015	0.611524	TRPV1, TRPV4, CACNA2D3, CACNA1C	660	98	20581	1.27279	1	0.916358	99.9998
Annotation Cluster 61	Enrichment Score: 0.6007762269729462
Category	Term	Count	%	PValue	Genes	List Total	Pop Hits	Pop Total	Fold Enrichment	Bonferroni	Benjamini	FDR
UP_SEQ_FEATURE	repeat:ARM 9	3	0.447761	0.11519	PKP1, KPNA4, KPNA3	655	18	20063	5.10509	1	0.98582	87.8303
UP_SEQ_FEATURE	repeat:ARM 8	3	0.447761	0.160024	PKP1, KPNA4, KPNA3	655	22	20063	4.17689	1	0.995896	95.027
UP_SEQ_FEATURE	repeat:ARM 7	3	0.447761	0.183475	PKP1, KPNA4, KPNA3	655	24	20063	3.82882	1	0.997762	96.9452
UP_SEQ_FEATURE	repeat:ARM 6	3	0.447761	0.207376	PKP1, KPNA4, KPNA3	655	26	20063	3.53429	1	0.998512	98.168
UP_SEQ_FEATURE	repeat:ARM 5	3	0.447761	0.243742	PKP1, KPNA4, KPNA3	655	29	20063	3.16868	1	0.998874	99.1836
UP_SEQ_FEATURE	repeat:ARM 4	3	0.447761	0.268135	PKP1, KPNA4, KPNA3	655	31	20063	2.96425	1	0.999393	99.5357
UP_SEQ_FEATURE	repeat:ARM 3	3	0.447761	0.328846	PKP1, KPNA4, KPNA3	655	36	20063	2.55254	1	0.999727	99.8954
UP_SEQ_FEATURE	repeat:ARM 2	3	0.447761	0.340851	PKP1, KPNA4, KPNA3	655	37	20063	2.48356	1	0.999777	99.9233
INTERPRO	IPR000225:Armadillo	3	0.447761	0.433848	PKP1, KPNA4, KPNA3	634	43	18559	2.04229	1	0.999362	99.9894
SMART	SM00185:ARM	3	0.447761	0.440682	PKP1, KPNA4, KPNA3	384	39	10057	2.01462	1	0.992572	99.9519
Annotation Cluster 62	Enrichment Score: 0.59097663261128
Category	Term	Count	%	PValue	Genes	List Total	Pop Hits	Pop Total	Fold Enrichment	Bonferroni	Benjamini	FDR
UP_SEQ_FEATURE	domain:Laminin EGF-like 3	3	0.447761	0.160024	LAMA5, LAMC2, NTN1	655	22	20063	4.17689	1	0.995896	95.027
UP_SEQ_FEATURE	domain:Laminin EGF-like 1	3	0.447761	0.207376	LAMA5, LAMC2, NTN1	655	26	20063	3.53429	1	0.998512	98.168
UP_SEQ_FEATURE	domain:Laminin EGF-like 2	3	0.447761	0.219447	LAMA5, LAMC2, NTN1	655	27	20063	3.40339	1	0.998606	98.5932
UP_KEYWORDS	Laminin EGF-like domain	3	0.447761	0.261436	LAMA5, LAMC2, NTN1	660	31	20581	3.01774	1	0.743844	98.5197
INTERPRO	IPR002049:EGF-like, laminin	3	0.447761	0.38595	LAMA5, LAMC2, NTN1	634	39	18559	2.25176	1	0.999022	99.9608
SMART	SM00180:EGF_Lam	3	0.447761	0.38723	LAMA5, LAMC2, NTN1	384	35	10057	2.24487	1	0.987819	99.8403
Annotation Cluster 63	Enrichment Score: 0.5783460944392255
Category	Term	Count	%	PValue	Genes	List Total	Pop Hits	Pop Total	Fold Enrichment	Bonferroni	Benjamini	FDR
UP_KEYWORDS	Repressor	30	4.47761	0.0158187	BACH1, SBNO2, BCLAF1, BACH2, FOXK1, NFKB2, ZNF175, MEN1, BATF, CDYL, CRY2, GATAD2B, ZC3H12A, BCL6, LIMD1, NFIL3, EWSR1, NFATC1, MAFF, CTBP1, NACC1, ZNF282, RREB1, TRIM27, BANP, ATXN1, HDAC4, ZBTB4, ZFPM1, CUX1	660	592	20581	1.58024	0.998039	0.199615	19.8818
UP_KEYWORDS	Activator	31	4.62687	0.0357826	E2F1, BACH1, RAI1, SBNO2, BACH2, FOXK1, SETD1B, SPI1, NFKB2, TACO1, BATF, MEIS2, MED28, MED26, MLLT1, BCL6, ARNTL2, NFIL3, NFATC1, FOXJ2, LMX1B, RREB1, ATMIN, DAPK3, IRF9, MEF2D, NR1I2, UBTF, DLX5, NOTCH4, ZFPM1	660	661	20581	1.46246	0.999999	0.299658	39.7437
GOTERM_MF_DIRECT	GO:0043565~sequence-specific DNA binding	26	3.8806	0.0654952	E2F1, BACH1, FOXK2, BATF, FOS, MEIS2, ZSCAN22, GATAD2B, BCL6, NFIL3, LHX8, ALX3, MAFF, LMX1B, FOXJ2, RXRB, ZNF165, HDAC4, DLX1, HOXB2, NR1I2, ETS1, DLX4, ZBTB4, CUX1, KDM6B	592	518	16881	1.43127	1	0.876639	65.0222
GOTERM_MF_DIRECT	GO:0003700~transcription factor activity, sequence-specific DNA binding	35	5.22388	0.500134	E2F1, BACH1, RAI1, ZNF611, BACH2, FOXK2, SPI1, NFKB2, ZNF175, BATF, FOS, MEIS2, ZSCAN22, GATAD2B, BCL6, ARNTL2, NFIL3, ZNF446, NFATC1, MAFF, CTBP1, LMX1B, RXRB, RREB1, GTF2H4, ZNF792, ZNF165, IRF9, MEF2D, TULP4, HOXB2, NR1I2, ETS1, DLX4, ZNF436	592	961	16881	1.03853	1	0.996695	99.9979
UP_KEYWORDS	Transcription regulation	73	10.8955	0.649201	BACH1, E2F1, BACH2, FOXK1, FOXK2, SPI1, NFKB2, BATF, MEN1, CRY2, MED28, MED26, LTF, NFIL3, ZNF446, ALX3, MAP2K6, SERTAD2, CTBP1, ZNF282, FOXJ2, RREB1, RXRB, GTF2H4, BANP, ZNF792, TAF6L, DAPK3, ARRB1, ZMIZ1, ZFPM1, CUX1, LBX2, ZNF436, SBNO2, BCLAF1, ZNF611, SETD1B, FHL2, ZNF175, CDYL, MEIS2, ZSCAN22, CASZ1, MLLT1, ZC3H12A, GATAD2B, BCL6, LIMD1, ARNTL2, LHX8, CHD4, EWSR1, NFATC1, MAFF, NACC1, LMX1B…	660	2332	20581	0.976151	1	0.927601	100
UP_KEYWORDS	Transcription	75	11.194	0.652743	BACH1, E2F1, BACH2, FOXK1, FOXK2, SPI1, NFKB2, BATF, MEN1, CRY2, MED28, MED26, LTF, NFIL3, ZNF446, ALX3, MAP2K6, SERTAD2, CTBP1, ZNF282, FOXJ2, RREB1, RXRB, GTF2H4, BANP, ZNF792, TAF6L, DAPK3, ARRB1, ZMIZ1, ZFPM1, CUX1, LBX2, ZNF436, SBNO2, BCLAF1, ZNF611, SETD1B, FHL2, ZNF175, CDYL, MEIS2, ZSCAN22, CASZ1, MLLT1, ZC3H12A, GATAD2B, BCL6, LIMD1, ARNTL2, LHX8, CHD4, EWSR1, NFATC1, MAFF, NACC1, POLR3…	660	2398	20581	0.975292	1	0.927011	100
UP_KEYWORDS	DNA-binding	59	8.80597	0.859814	BACH1, E2F1, BACH2, FOXK1, FOXK2, SPI1, NFKB2, MEN1, BATF, FOS, LTF, NFIL3, ZNF446, ALX3, RTEL1, ZNF282, FOXJ2, RREB1, RXRB, G3BP1, BANP, ZNF792, HIST1H1T, ZFPM1, CUX1, LBX2, ZNF436, ZC3H3, BCLAF1, ZNF611, ZNF175, APLP2, POLE4, MEIS2, ZSCAN22, CASZ1, ZC3H12A, BCL6, MEIS3P1, ARNTL2, LHX8, CHD4, NFATC1, MAFF, LMX1B, TRIM27, ZNF165, ATXN1, IRF9, MEF2D, DLX1, NR1I2, HOXB2, UBTF, ETS1, DLX5, DLX4, ZBT…	660	2050	20581	0.897472	1	0.98632	100
GOTERM_BP_DIRECT	GO:0006355~regulation of transcription, DNA-templated	44	6.56716	0.946174	E2F1, BACH1, ZNF611, SBNO2, CARHSP1, ACVRL1, SETD1B, FOXK2, NFKB2, ZMYND8, ZNF175, MEIS2, CDYL, ZSCAN22, MED28, CASZ1, MLLT1, MEIS3P1, LIMD1, ARNTL2, LHX8, MLLT6, ALX3, EWSR1, CHD4, MAP2K6, ZNF282, LMX1B, RREB1, RXRB, TGFBR1, ZNF792, DAPK3, ZNF165, IRF9, TULP4, DLX1, HOXB2, NOTCH4, DLX4, KDM4B, LBX2, ZNF385A, ZNF436	596	1504	16792	0.824254	1	1	100
GOTERM_BP_DIRECT	GO:0006351~transcription, DNA-templated	56	8.35821	0.975553	E2F1, FOXK1, MEN1, CRY2, MED28, MED26, LTF, ZNF446, ALX3, MAP2K6, SERTAD2, CTBP1, ZNF282, RXRB, BANP, ZNF792, DAPK3, ZMIZ1, ZFPM1, CUX1, LBX2, ZNF436, BCLAF1, ZNF611, SBNO2, LIN9, SETD1B, FHL2, DIDO1, ZNF175, CDYL, ZSCAN22, CASZ1, GATAD2B, ZC3H12A, BCL6, LIMD1, ARNTL2, LHX8, CHD4, EWSR1, NACC1, POLR3H, LMX1B, TRIM27, SKI, ATMIN, ZNF165, ATXN1, HDAC4, MEF2D, NR1I2, HOXB2, KDM4B, ZBTB4, ZNF385A	596	1955	16792	0.807044	1	1	100
Annotation Cluster 64	Enrichment Score: 0.5653621432627735
Category	Term	Count	%	PValue	Genes	List Total	Pop Hits	Pop Total	Fold Enrichment	Bonferroni	Benjamini	FDR
UP_KEYWORDS	Cell cycle	28	4.1791	0.101317	E2F1, MAD1L1, DAB2IP, PARD3, RECQL5, NEK3, TP53BP2, LIN9, TPX2, PKMYT1, BANP, CDC20, PRKCE, SRC, FSD1, NUMA1, PRR5, HMCN1, MAD2L1, BRE, CABLES2, TLK1, RBM38, MAP9, CHFR, CDK14, BLCAP, SEPT9	660	650	20581	1.34328	1	0.513321	77.3514
UP_KEYWORDS	Cell division	17	2.53731	0.183134	MAD1L1, PARD3, RECQL5, NEK3, TPX2, CDC20, PRKCE, FSD1, NUMA1, HMCN1, MAD2L1, BRE, CABLES2, CHFR, MAP9, CDK14, SEPT9	660	388	20581	1.36628	1	0.64198	93.992
GOTERM_BP_DIRECT	GO:0051301~cell division	16	2.38806	0.260703	MAD1L1, RECQL5, NEK3, TPX2, CDC20, PRKCE, FSD1, NUMA1, TUBB, HMCN1, MAD2L1, BRE, CABLES2, CHFR, CDK14, SEPT9	596	350	16792	1.28798	1	0.996935	99.529
UP_KEYWORDS	Mitosis	10	1.49254	0.469395	FSD1, MAD1L1, NUMA1, MAD2L1, NEK3, BRE, TPX2, CDC20, MAP9, CHFR	660	262	20581	1.1902	1	0.855701	99.9851
GOTERM_BP_DIRECT	GO:0007067~mitotic nuclear division	9	1.34328	0.656222	FSD1, NUMA1, RECQL5, NEK3, BRE, TPX2, PKMYT1, CDC20, CHFR	596	248	16792	1.02246	1	0.999984	100
Annotation Cluster 65	Enrichment Score: 0.5619880633709695
Category	Term	Count	%	PValue	Genes	List Total	Pop Hits	Pop Total	Fold Enrichment	Bonferroni	Benjamini	FDR
COG_ONTOLOGY	Intracellular trafficking and secretion	4	0.597015	0.0868034	COPG2, KPNA4, KPNA3, RPTOR	52	42	2026	3.71062	0.864352	0.631696	50.8682
INTERPRO	IPR011989:Armadillo-like helical	10	1.49254	0.362241	COPG2, CAB39L, PKP1, AP2A1, GPRASP2, KPNA4, PSME4, KPNA3, RPTOR, EFR3B	634	225	18559	1.30102	1	0.998995	99.9278
INTERPRO	IPR016024:Armadillo-type fold	12	1.79104	0.655392	COPG2, CAB39L, PKP1, AP2A1, GPRASP2, URB1, TELO2, KPNA4, PSME4, KPNA3, RPTOR, EFR3B	634	351	18559	1.00078	1	0.999981	100
Annotation Cluster 66	Enrichment Score: 0.558943098573929
Category	Term	Count	%	PValue	Genes	List Total	Pop Hits	Pop Total	Fold Enrichment	Bonferroni	Benjamini	FDR
UP_KEYWORDS	Collagen	7	1.04478	0.0946183	C1QTNF7, C1QTNF5, COL9A3, RXRB, COL4A3BP, C1QTNF1, COL16A1	660	98	20581	2.22738	1	0.500434	74.888
UP_SEQ_FEATURE	domain:C1q	3	0.447761	0.280333	C1QTNF7, C1QTNF5, C1QTNF1	655	32	20063	2.87161	1	0.999469	99.6523
INTERPRO	IPR008983:Tumour necrosis factor-like domain	4	0.597015	0.289101	C1QTNF7, TULP4, C1QTNF5, C1QTNF1	634	55	18559	2.12894	1	0.997624	99.5863
INTERPRO	IPR008160:Collagen triple helix repeat	5	0.746269	0.306419	C1QTNF7, C1QTNF5, COL9A3, C1QTNF1, COL16A1	634	82	18559	1.78493	1	0.997957	99.7218
INTERPRO	IPR001073:Complement C1q protein	3	0.447761	0.32377	C1QTNF7, C1QTNF5, C1QTNF1	634	34	18559	2.5829	1	0.99824	99.8149
UP_SEQ_FEATURE	domain:Collagen-like	3	0.447761	0.340851	C1QTNF7, C1QTNF5, C1QTNF1	655	37	20063	2.48356	1	0.999777	99.9233
SMART	SM00110:C1Q	3	0.447761	0.345716	C1QTNF7, C1QTNF5, C1QTNF1	384	32	10057	2.45532	1	0.980737	99.6218
GOTERM_CC_DIRECT	GO:0005581~collagen trimer	5	0.746269	0.376635	C1QTNF7, C1QTNF5, RXRB, COL4A3BP, C1QTNF1	616	92	18224	1.60785	1	0.875381	99.8701
Annotation Cluster 67	Enrichment Score: 0.5516758637103408
Category	Term	Count	%	PValue	Genes	List Total	Pop Hits	Pop Total	Fold Enrichment	Bonferroni	Benjamini	FDR
UP_KEYWORDS	Notch signaling pathway	4	0.597015	0.22348	DTX2, NOTCH4, JAG2, SEL1L	660	51	20581	2.44575	1	0.696243	97.0289
KEGG_PATHWAY	hsa04330:Notch signaling pathway	4	0.597015	0.256498	CTBP1, DTX2, NOTCH4, JAG2	254	48	6910	2.26706	1	0.674894	97.893
GOTERM_BP_DIRECT	GO:0007219~Notch signaling pathway	6	0.895522	0.386056	KRT19, GMDS, DTX2, NOTCH4, JAG2, SEL1L	596	115	16792	1.46997	1	0.999187	99.9826
Annotation Cluster 68	Enrichment Score: 0.5513650949903248
Category	Term	Count	%	PValue	Genes	List Total	Pop Hits	Pop Total	Fold Enrichment	Bonferroni	Benjamini	FDR
UP_SEQ_FEATURE	domain:Arf-GAP	3	0.447761	0.255933	ARFGAP3, ASAP2, ASAP3	655	30	20063	3.06305	1	0.999174	99.3828
INTERPRO	IPR001164:Arf GTPase activating protein	3	0.447761	0.272894	ARFGAP3, ASAP2, ASAP3	634	30	18559	2.92729	1	0.997305	99.4056
SMART	SM00105:ArfGap	3	0.447761	0.31753	ARFGAP3, ASAP2, ASAP3	384	30	10057	2.61901	1	0.974876	99.3416
Annotation Cluster 69	Enrichment Score: 0.5510852793155387
Category	Term	Count	%	PValue	Genes	List Total	Pop Hits	Pop Total	Fold Enrichment	Bonferroni	Benjamini	FDR
GOTERM_BP_DIRECT	GO:0061337~cardiac conduction	4	0.597015	0.213129	TRPM4, CACNA2D3, CACNA1C, KCNQ1	596	45	16792	2.5044	1	0.994243	98.5762
INTERPRO	IPR005821:Ion transport domain	6	0.895522	0.294962	TRPM4, KCNMA1, TRPV1, TRPV4, CACNA1C, KCNQ1	634	106	18559	1.65695	1	0.997746	99.6379
GOTERM_BP_DIRECT	GO:0086091~regulation of heart rate by cardiac conduction	3	0.447761	0.353456	TRPM4, CACNA1C, KCNQ1	596	35	16792	2.41496	1	0.99881	99.9563
Annotation Cluster 70	Enrichment Score: 0.5465696796255365
Category	Term	Count	%	PValue	Genes	List Total	Pop Hits	Pop Total	Fold Enrichment	Bonferroni	Benjamini	FDR
KEGG_PATHWAY	hsa05223:Non-small cell lung cancer	5	0.746269	0.148004	PRKCA, E2F1, EGFR, RXRB, PRKCG	254	56	6910	2.42899	1	0.59509	87.5817
KEGG_PATHWAY	hsa05214:Glioma	5	0.746269	0.213972	PRKCA, E2F1, EGFR, PRKCG, CALM1	254	65	6910	2.09267	1	0.645307	95.6524
KEGG_PATHWAY	hsa05206:MicroRNAs in cancer	10	1.49254	0.723871	PRKCA, E2F1, EGFR, CRKL, TNXB, NOTCH4, PRKCG, PRKCE, BCL2L11, RPTOR	254	285	6910	0.954552	1	0.917519	100
Annotation Cluster 71	Enrichment Score: 0.5183229648532204
Category	Term	Count	%	PValue	Genes	List Total	Pop Hits	Pop Total	Fold Enrichment	Bonferroni	Benjamini	FDR
UP_SEQ_FEATURE	domain:Laminin G-like 3	3	0.447761	0.137197	EGFLAM, LAMA5, CNTNAP1	655	20	20063	4.59458	1	0.992399	92.1109
UP_SEQ_FEATURE	domain:Laminin G-like 2	3	0.447761	0.255933	EGFLAM, LAMA5, CNTNAP1	655	30	20063	3.06305	1	0.999174	99.3828
UP_SEQ_FEATURE	domain:Laminin G-like 1	3	0.447761	0.255933	EGFLAM, LAMA5, CNTNAP1	655	30	20063	3.06305	1	0.999174	99.3828
INTERPRO	IPR001791:Laminin G domain	4	0.597015	0.336092	EGFLAM, LAMA5, CNTNAP1, COL16A1	634	60	18559	1.95152	1	0.998433	99.8623
SMART	SM00282:LamG	3	0.447761	0.479049	EGFLAM, LAMA5, CNTNAP1	384	42	10057	1.87072	1	0.995182	99.9811
INTERPRO	IPR013320:Concanavalin A-like lectin/glucanase, subgroup	9	1.34328	0.536569	FSD1, EGFLAM, LAMA5, LMAN2L, TRIM27, SPSB4, CNTNAP1, PAPPA2, COL16A1	634	232	18559	1.13559	1	0.999891	99.9996
Annotation Cluster 72	Enrichment Score: 0.50930023201215
Category	Term	Count	%	PValue	Genes	List Total	Pop Hits	Pop Total	Fold Enrichment	Bonferroni	Benjamini	FDR
UP_KEYWORDS	Isomerase	9	1.34328	0.0424917	PGM2, FKBP9, HSD3B1, PGAM1, GALE, TSTA3, PDIA4, FKBP10, ITPK1	660	122	20581	2.30041	1	0.332508	45.3178
GOTERM_BP_DIRECT	GO:0061077~chaperone-mediated protein folding	3	0.447761	0.379162	FKBP9, PDIA4, FKBP10	596	37	16792	2.28442	1	0.999079	99.9787
UP_SEQ_FEATURE	short sequence motif:Prevents secretion from ER	3	0.447761	0.595717	FKBP9, PDIA4, FKBP10	655	61	20063	1.50642	1	0.999999	100
GOTERM_BP_DIRECT	GO:0006457~protein folding	4	0.597015	0.956379	FKBP9, LMAN2L, PDIA4, FKBP10	596	180	16792	0.6261	1	1	100
Annotation Cluster 73	Enrichment Score: 0.49825521319295224
Category	Term	Count	%	PValue	Genes	List Total	Pop Hits	Pop Total	Fold Enrichment	Bonferroni	Benjamini	FDR
GOTERM_BP_DIRECT	GO:0010595~positive regulation of endothelial cell migration	5	0.746269	0.0792001	PRKCA, ETS1, ZC3H12A, SCARB1, FGF2	596	46	16792	3.06245	1	0.95469	76.8617
GOTERM_BP_DIRECT	GO:0001938~positive regulation of endothelial cell proliferation	5	0.746269	0.228294	PRKCA, ACVRL1, TGFBR1, FGF2, RPTOR	596	69	16792	2.04163	1	0.995283	98.9919
UP_KEYWORDS	Angiogenesis	6	0.895522	0.377997	PRKCA, DAB2IP, ACVRL1, ZC3H12A, FGF2, PARVA	660	126	20581	1.48492	1	0.803779	99.8641
GOTERM_BP_DIRECT	GO:0045766~positive regulation of angiogenesis	5	0.746269	0.585434	PRKCA, ACVRL1, ETS1, ZC3H12A, FGF2	596	115	16792	1.22498	1	0.999937	100
GOTERM_BP_DIRECT	GO:0001525~angiogenesis	7	1.04478	0.806376	PRKCA, DAB2IP, ACVRL1, LAMA5, ZC3H12A, CEACAM1, PNPLA6	596	223	16792	0.884401	1	1	100
Annotation Cluster 74	Enrichment Score: 0.49324884742622094
Category	Term	Count	%	PValue	Genes	List Total	Pop Hits	Pop Total	Fold Enrichment	Bonferroni	Benjamini	FDR
UP_SEQ_FEATURE	domain:Ig-like C1-type	3	0.447761	0.280333	MR1, HLA-E, TAPBP	655	32	20063	2.87161	1	0.999469	99.6523
GOTERM_BP_DIRECT	GO:0002474~antigen processing and presentation of peptide antigen via MHC class I	3	0.447761	0.287798	MR1, HLA-E, TAPBP	596	30	16792	2.81745	1	0.997762	99.7571
INTERPRO	IPR003597:Immunoglobulin C1-set	4	0.597015	0.410669	MR1, HLA-E, SIRPA, TAPBP	634	68	18559	1.72193	1	0.999084	99.9797
Annotation Cluster 75	Enrichment Score: 0.48364321602339255
Category	Term	Count	%	PValue	Genes	List Total	Pop Hits	Pop Total	Fold Enrichment	Bonferroni	Benjamini	FDR
UP_KEYWORDS	Cholesterol metabolism	4	0.597015	0.275243	HMGCS2, LDLR, INSIG1, DHCR24	660	57	20581	2.1883	1	0.756897	98.8613
UP_KEYWORDS	Steroid metabolism	5	0.746269	0.296733	HMGCS2, LDLR, INSIG1, HSD11B1, DHCR24	660	86	20581	1.81298	1	0.765156	99.2506
UP_KEYWORDS	Sterol metabolism	4	0.597015	0.363263	HMGCS2, LDLR, INSIG1, DHCR24	660	67	20581	1.86169	1	0.80195	99.8118
GOTERM_BP_DIRECT	GO:0006695~cholesterol biosynthetic process	3	0.447761	0.391855	HMGCS2, INSIG1, DHCR24	596	38	16792	2.2243	1	0.999202	99.9853
Annotation Cluster 76	Enrichment Score: 0.47640468909993716
Category	Term	Count	%	PValue	Genes	List Total	Pop Hits	Pop Total	Fold Enrichment	Bonferroni	Benjamini	FDR
INTERPRO	IPR013098:Immunoglobulin I-set	10	1.49254	0.0524688	IGDCC3, PXDN, HMCN1, PTPRF, IGFBP7, LRIG1, OBSL1, PALLD, BOC, MYOT	634	141	18559	2.07609	1	0.882238	57.9701
UP_SEQ_FEATURE	domain:Ig-like C2-type 3	9	1.34328	0.0583259	IGDCC3, PXDN, HMCN1, PTPRF, LRIG1, PALLD, BOC, IL1RAPL1, CEACAM1	655	128	20063	2.15371	1	0.965509	64.4513
UP_SEQ_FEATURE	domain:Ig-like C2-type 1	10	1.49254	0.214814	IGDCC3, PXDN, HMCN1, PTPRF, LRIG1, PALLD, BOC, IL1RAPL1, CEACAM1, MYOT	655	202	20063	1.51636	1	0.998628	98.4424
UP_SEQ_FEATURE	domain:Ig-like C2-type 2	10	1.49254	0.21883	IGDCC3, PXDN, HMCN1, PTPRF, LRIG1, PALLD, BOC, IL1RAPL1, CEACAM1, MYOT	655	203	20063	1.50889	1	0.998695	98.574
UP_SEQ_FEATURE	domain:Ig-like C2-type 4	5	0.746269	0.235495	IGDCC3, PXDN, HMCN1, PALLD, BOC	655	76	20063	2.01517	1	0.998947	99.0161
INTERPRO	IPR003598:Immunoglobulin subtype 2	11	1.64179	0.349198	IGDCC3, PXDN, HMCN1, PTPRF, LRIG1, OBSL1, PALLD, BOC, IL1RAPL1, CEACAM1, MYOT	634	250	18559	1.28801	1	0.998746	99.9001
SMART	SM00408:IGc2	11	1.64179	0.482436	IGDCC3, PXDN, HMCN1, PTPRF, LRIG1, OBSL1, PALLD, BOC, IL1RAPL1, CEACAM1, MYOT	384	250	10057	1.15236	1	0.994648	99.9827
UP_KEYWORDS	Immunoglobulin domain	18	2.68657	0.5821	HAPLN2, IGDCC3, PXDN, PTPRF, IGFBP7, LRIG1, PALLD, SIRPA, MYOT, TAPBP, HMCN1, OBSL1, CSF3R, SEMA3B, MR1, BOC, IL1RAPL1, CEACAM1	660	546	20581	1.02802	1	0.907974	99.9995
INTERPRO	IPR003599:Immunoglobulin subtype	15	2.23881	0.804025	HAPLN2, IGDCC3, PXDN, PTPRF, IGFBP7, LRIG1, PALLD, SIRPA, MYOT, HMCN1, OBSL1, SEMA3B, BOC, IL1RAPL1, CEACAM1	634	497	18559	0.883487	1	1	100
INTERPRO	IPR013783:Immunoglobulin-like fold	29	4.32836	0.81629	IGDCC3, PXDN, PLXNC1, IGFBP7, LRIG1, NFKB2, MYOT, TAPBP, RIMBP3C, HMCN1, OBSL1, CSF3R, SEMA3B, MR1, BOC, IL1RAPL1, CEACAM1, FNDC3B, NFATC1, HAPLN2, TNXB, PTPRF, RIMBP2, PALLD, HLA-E, SIRPA, FLNB, FSD1, EGFLAM	634	951	18559	0.892653	1	1	100
SMART	SM00409:IG	15	2.23881	0.908859	HAPLN2, IGDCC3, PXDN, PTPRF, IGFBP7, LRIG1, PALLD, SIRPA, MYOT, HMCN1, OBSL1, SEMA3B, BOC, IL1RAPL1, CEACAM1	384	497	10057	0.790446	1	0.999997	100
INTERPRO	IPR007110:Immunoglobulin-like domain	19	2.83582	0.968519	HAPLN2, IGDCC3, PXDN, PTPRF, IGFBP7, LRIG1, PALLD, HLA-E, SIRPA, MYOT, TAPBP, HMCN1, OBSL1, CSF3R, SEMA3B, MR1, BOC, IL1RAPL1, CEACAM1	634	771	18559	0.721381	1	1	100
Annotation Cluster 77	Enrichment Score: 0.4628054450449374
Category	Term	Count	%	PValue	Genes	List Total	Pop Hits	Pop Total	Fold Enrichment	Bonferroni	Benjamini	FDR
UP_SEQ_FEATURE	domain:PDZ 3	3	0.447761	0.255933	PARD3, FRMPD2, DLG5	655	30	20063	3.06305	1	0.999174	99.3828
UP_SEQ_FEATURE	domain:PDZ 1	3	0.447761	0.399695	PARD3, FRMPD2, DLG5	655	42	20063	2.1879	1	0.999927	99.9847
UP_SEQ_FEATURE	domain:PDZ 2	3	0.447761	0.399695	PARD3, FRMPD2, DLG5	655	42	20063	2.1879	1	0.999927	99.9847
Annotation Cluster 78	Enrichment Score: 0.4617123668107711
Category	Term	Count	%	PValue	Genes	List Total	Pop Hits	Pop Total	Fold Enrichment	Bonferroni	Benjamini	FDR
GOTERM_MF_DIRECT	GO:0004003~ATP-dependent DNA helicase activity	4	0.597015	0.100269	G3BP1, GTF2H4, RTEL1, CHD4	592	32	16881	3.5644	1	0.915426	80.573
GOTERM_BP_DIRECT	GO:0032508~DNA duplex unwinding	4	0.597015	0.203873	RECQL5, G3BP1, RTEL1, CHD4	596	44	16792	2.56132	1	0.993457	98.248
GOTERM_MF_DIRECT	GO:0008026~ATP-dependent helicase activity	3	0.447761	0.26992	RECQL5, RTEL1, CHD4	592	29	16881	2.94985	1	0.978351	99.2393
UP_SEQ_FEATURE	short sequence motif:DEAH box	3	0.447761	0.411177	RECQL5, RTEL1, CHD4	655	43	20063	2.13701	1	0.999939	99.989
UP_KEYWORDS	Helicase	4	0.597015	0.840541	RECQL5, G3BP1, RTEL1, CHD4	660	143	20581	0.872261	1	0.982278	100
UP_SEQ_FEATURE	domain:Helicase ATP-binding	3	0.447761	0.889975	RECQL5, RTEL1, CHD4	655	114	20063	0.806067	1	1	100
Annotation Cluster 79	Enrichment Score: 0.4590067184858441
Category	Term	Count	%	PValue	Genes	List Total	Pop Hits	Pop Total	Fold Enrichment	Bonferroni	Benjamini	FDR
UP_SEQ_FEATURE	domain:BTB	9	1.34328	0.0991663	BACH1, KLHL29, NACC1, BACH2, KBTBD3, ZBTB4, BCL6, TNFAIP1, BTBD9	655	144	20063	1.91441	1	0.985197	83.4261
INTERPRO	IPR011705:BTB/Kelch-associated	3	0.447761	0.629543	KLHL29, KBTBD3, BTBD9	634	62	18559	1.41643	1	0.999972	100
SMART	SM00875:SM00875	3	0.447761	0.672342	KLHL29, KBTBD3, BTBD9	384	60	10057	1.30951	1	0.998937	100
Annotation Cluster 80	Enrichment Score: 0.43521678557943716
Category	Term	Count	%	PValue	Genes	List Total	Pop Hits	Pop Total	Fold Enrichment	Bonferroni	Benjamini	FDR
UP_SEQ_FEATURE	domain:WW 1	3	0.447761	0.243742	PLEKHA7, WWC2, WWOX	655	29	20063	3.16868	1	0.998874	99.1836
UP_SEQ_FEATURE	domain:WW 2	3	0.447761	0.243742	PLEKHA7, WWC2, WWOX	655	29	20063	3.16868	1	0.998874	99.1836
INTERPRO	IPR001202:WW domain	3	0.447761	0.54394	PLEKHA7, WWC2, WWOX	634	53	18559	1.65695	1	0.999881	99.9997
SMART	SM00456:WW	3	0.447761	0.561982	PLEKHA7, WWC2, WWOX	384	49	10057	1.60348	1	0.997164	99.9981
Annotation Cluster 81	Enrichment Score: 0.42241083630964493
Category	Term	Count	%	PValue	Genes	List Total	Pop Hits	Pop Total	Fold Enrichment	Bonferroni	Benjamini	FDR
GOTERM_MF_DIRECT	GO:0005070~SH3/SH2 adaptor activity	7	1.04478	0.0132284	CRKL, TP53BP2, RUSC1, GAB1, CNTNAP1, SRC, BCAR3	592	56	16881	3.5644	0.99999	0.649072	18.6581
UP_SEQ_FEATURE	domain:SH2	3	0.447761	0.824845	CRKL, SRC, BCAR3	655	96	20063	0.957204	1	1	100
UP_KEYWORDS	SH2 domain	3	0.447761	0.864632	CRKL, SRC, BCAR3	660	108	20581	0.866204	1	0.987014	100
INTERPRO	IPR000980:SH2 domain	3	0.447761	0.901824	CRKL, SRC, BCAR3	634	113	18559	0.777156	1	1	100
SMART	SM00252:SH2	3	0.447761	0.908058	CRKL, SRC, BCAR3	384	103	10057	0.762819	1	0.999997	100
Annotation Cluster 82	Enrichment Score: 0.4072769370166299
Category	Term	Count	%	PValue	Genes	List Total	Pop Hits	Pop Total	Fold Enrichment	Bonferroni	Benjamini	FDR
UP_SEQ_FEATURE	domain:SOCS box	3	0.447761	0.352787	WSB1, TULP4, SPSB4	655	38	20063	2.4182	1	0.999832	99.944
INTERPRO	IPR001496:SOCS protein, C-terminal	3	0.447761	0.38595	WSB1, TULP4, SPSB4	634	39	18559	2.25176	1	0.999022	99.9608
SMART	SM00969:SM00969	3	0.447761	0.440682	WSB1, TULP4, SPSB4	384	39	10057	2.01462	1	0.992572	99.9519
Annotation Cluster 83	Enrichment Score: 0.4062281514143201
Category	Term	Count	%	PValue	Genes	List Total	Pop Hits	Pop Total	Fold Enrichment	Bonferroni	Benjamini	FDR
UP_KEYWORDS	Endonuclease	5	0.746269	0.282331	DCLRE1C, DNASE1, RNASEK, G3BP1, ZC3H12A	660	84	20581	1.85615	1	0.759592	99.0067
UP_KEYWORDS	Nuclease	6	0.895522	0.428827	DCLRE1C, DNASE1, RNASEK, DFFB, G3BP1, ZC3H12A	660	134	20581	1.39627	1	0.836312	99.9584
GOTERM_BP_DIRECT	GO:0090305~nucleic acid phosphodiester bond hydrolysis	4	0.597015	0.4992	DCLRE1C, PNKP, DNASE1, G3BP1	596	75	16792	1.50264	1	0.999809	99.9995
Annotation Cluster 84	Enrichment Score: 0.3837558114413843
Category	Term	Count	%	PValue	Genes	List Total	Pop Hits	Pop Total	Fold Enrichment	Bonferroni	Benjamini	FDR
INTERPRO	IPR023795:Protease inhibitor I4, serpin, conserved site	3	0.447761	0.311113	SERPINF1, SERPINE3, SERPINC1	634	33	18559	2.66117	1	0.998004	99.7506
INTERPRO	IPR000215:Serpin family	3	0.447761	0.373694	SERPINF1, SERPINE3, SERPINC1	634	38	18559	2.31102	1	0.999083	99.9461
INTERPRO	IPR023796:Serpin domain	3	0.447761	0.373694	SERPINF1, SERPINE3, SERPINC1	634	38	18559	2.31102	1	0.999083	99.9461
SMART	SM00093:SERPIN	3	0.447761	0.41426	SERPINF1, SERPINE3, SERPINC1	384	37	10057	2.12352	1	0.99052	99.9117
GOTERM_MF_DIRECT	GO:0004867~serine-type endopeptidase inhibitor activity	5	0.746269	0.442524	SERPINF1, SERPINE3, SERPINC1, ITIH3, APLP2	592	97	16881	1.46986	1	0.994245	99.9884
GOTERM_BP_DIRECT	GO:0010951~negative regulation of endopeptidase activity	5	0.746269	0.625615	SERPINF1, SERPINE3, SERPINC1, ITIH3, APLP2	596	121	16792	1.16424	1	0.99997	100
Annotation Cluster 85	Enrichment Score: 0.3837010228590669
Category	Term	Count	%	PValue	Genes	List Total	Pop Hits	Pop Total	Fold Enrichment	Bonferroni	Benjamini	FDR
UP_SEQ_FEATURE	domain:IQ 2	3	0.447761	0.292514	MYO10, MYO9B, IQCE	655	33	20063	2.78459	1	0.999493	99.7408
UP_SEQ_FEATURE	domain:IQ 1	3	0.447761	0.292514	MYO10, MYO9B, IQCE	655	33	20063	2.78459	1	0.999493	99.7408
INTERPRO	IPR000048:IQ motif, EF-hand binding site	4	0.597015	0.573765	MYO10, MYO9B, IQSEC1, IQCE	634	87	18559	1.34588	1	0.999934	99.9999
SMART	SM00015:IQ	3	0.447761	0.594522	MYO10, MYO9B, IQCE	384	52	10057	1.51097	1	0.998068	99.9993
Annotation Cluster 86	Enrichment Score: 0.36995522190252944
Category	Term	Count	%	PValue	Genes	List Total	Pop Hits	Pop Total	Fold Enrichment	Bonferroni	Benjamini	FDR
INTERPRO	IPR005821:Ion transport domain	6	0.895522	0.294962	TRPM4, KCNMA1, TRPV1, TRPV4, CACNA1C, KCNQ1	634	106	18559	1.65695	1	0.997746	99.6379
UP_KEYWORDS	Ion channel	14	2.08955	0.369911	KCNMA1, TRPM4, TMC3, TRPV1, CNGB1, CLIC1, CACNA2D3, KCNN3, TRPV4, CACNA1C, CALHM3, KCNQ1, SCNN1A, CHRNG	660	359	20581	1.21606	1	0.797747	99.8373
UP_KEYWORDS	Voltage-gated channel	5	0.746269	0.711657	KCNMA1, CLIC1, CACNA2D3, CACNA1C, KCNQ1	660	150	20581	1.03944	1	0.949366	100
Annotation Cluster 87	Enrichment Score: 0.35953789105972866
Category	Term	Count	%	PValue	Genes	List Total	Pop Hits	Pop Total	Fold Enrichment	Bonferroni	Benjamini	FDR
GOTERM_CC_DIRECT	GO:0022625~cytosolic large ribosomal subunit	7	1.04478	0.0269846	MRPL1, RPL19, RPL13, RPL27A, RPL23A, RPL38, FXR2	616	68	18224	3.04545	0.999991	0.382538	31.9316
GOTERM_BP_DIRECT	GO:0006614~SRP-dependent cotranslational protein targeting to membrane	6	0.895522	0.240407	RPL19, RPL13, RPL27A, RPL23A, RPL38, SEC61A1	596	94	16792	1.79837	1	0.995954	99.2386
GOTERM_BP_DIRECT	GO:0006412~translation	11	1.64179	0.407983	EGFR, MRPL1, RPL19, RPL13, SLC25A38, RPL27A, RPL23A, RPL38, TNIP1, SLC25A18, SLC25A17	596	253	16792	1.22498	1	0.999363	99.9908
GOTERM_MF_DIRECT	GO:0003735~structural constituent of ribosome	9	1.34328	0.511936	MRPL1, RPL19, RPL13, SLC25A38, RPL27A, RPL23A, RPL38, SLC25A18, SLC25A17	592	222	16881	1.15602	1	0.996802	99.9985
UP_KEYWORDS	Ribosomal protein	7	1.04478	0.545097	MRPL1, RPL19, RPL13, RXRB, RPL27A, RPL23A, RPL38	660	185	20581	1.17991	1	0.89092	99.9982
KEGG_PATHWAY	hsa03010:Ribosome	6	0.895522	0.560802	MRPL1, RPL19, RPL13, RPL27A, RPL23A, RPL38	254	136	6910	1.20021	1	0.83754	99.9978
GOTERM_BP_DIRECT	GO:0019083~viral transcription	5	0.746269	0.564434	RPL19, RPL13, RPL27A, RPL23A, RPL38	596	112	16792	1.25779	1	0.999921	100
GOTERM_BP_DIRECT	GO:0000184~nuclear-transcribed mRNA catabolic process, nonsense-mediated decay	5	0.746269	0.612499	RPL19, RPL13, RPL27A, RPL23A, RPL38	596	119	16792	1.1838	1	0.999961	100
GOTERM_CC_DIRECT	GO:0005840~ribosome	6	0.895522	0.663418	RPL19, RPL13, RXRB, RPL27A, RPL23A, RPL38	616	166	18224	1.06932	1	0.979828	100
GOTERM_BP_DIRECT	GO:0006413~translational initiation	5	0.746269	0.720026	RPL19, RPL13, RPL27A, RPL23A, RPL38	596	137	16792	1.02827	1	0.999996	100
GOTERM_BP_DIRECT	GO:0006364~rRNA processing	7	1.04478	0.774191	RPL19, CSNK1D, CSNK1E, RPL13, RPL27A, RPL23A, RPL38	596	214	16792	0.921596	1	0.999999	100
UP_KEYWORDS	Ribonucleoprotein	7	1.04478	0.915458	MRPL1, RPL19, RPL13, RXRB, RPL27A, RPL23A, RPL38	660	296	20581	0.737444	1	0.994447	100
Annotation Cluster 88	Enrichment Score: 0.355258732682385
Category	Term	Count	%	PValue	Genes	List Total	Pop Hits	Pop Total	Fold Enrichment	Bonferroni	Benjamini	FDR
GOTERM_BP_DIRECT	GO:0046718~viral entry into host cell	5	0.746269	0.314982	SIVA1, LDLR, SCARB1, HSPA1B, KPNA3	596	80	16792	1.76091	1	0.998417	99.8782
GOTERM_MF_DIRECT	GO:0001618~virus receptor activity	4	0.597015	0.445777	SIVA1, LDLR, SCARB1, HSPA1B	592	70	16881	1.62944	1	0.994239	99.9894
UP_KEYWORDS	Host cell receptor for virus entry	3	0.447761	0.612097	LDLR, SCARB1, HSPA1B	660	64	20581	1.46172	1	0.915289	99.9998
Annotation Cluster 89	Enrichment Score: 0.3544883126553126
Category	Term	Count	%	PValue	Genes	List Total	Pop Hits	Pop Total	Fold Enrichment	Bonferroni	Benjamini	FDR
UP_KEYWORDS	Fatty acid metabolism	6	0.895522	0.365242	SCD, PRKAG2, LYPLA2, ACSL6, ACOX3, HSD17B8	660	124	20581	1.50887	1	0.801225	99.8197
KEGG_PATHWAY	hsa03320:PPAR signaling pathway	4	0.597015	0.44682	RXRB, SCD, ACSL6, ACOX3	254	67	6910	1.62416	1	0.774396	99.9552
KEGG_PATHWAY	hsa01212:Fatty acid metabolism	3	0.447761	0.529446	SCD, ACSL6, ACOX3	254	48	6910	1.7003	1	0.816305	99.9946
Annotation Cluster 90	Enrichment Score: 0.3502040928738026
Category	Term	Count	%	PValue	Genes	List Total	Pop Hits	Pop Total	Fold Enrichment	Bonferroni	Benjamini	FDR
GOTERM_BP_DIRECT	GO:0017148~negative regulation of translation	4	0.597015	0.338498	FXR2, DAPK3, GAPDH, DAPK1	596	58	16792	1.94307	1	0.998764	99.9345
UP_KEYWORDS	Translation regulation	5	0.746269	0.43481	DAPK3, GAPDH, ZNF385A, TACO1, DAPK1	660	105	20581	1.48492	1	0.839378	99.9641
GOTERM_BP_DIRECT	GO:0071346~cellular response to interferon-gamma	3	0.447761	0.604689	DAPK3, GAPDH, DAPK1	596	57	16792	1.48287	1	0.999956	100
Annotation Cluster 91	Enrichment Score: 0.34783875717534335
Category	Term	Count	%	PValue	Genes	List Total	Pop Hits	Pop Total	Fold Enrichment	Bonferroni	Benjamini	FDR
GOTERM_MF_DIRECT	GO:0004843~thiol-dependent ubiquitin-specific protease activity	6	0.895522	0.148617	JOSD1, USP5, USP1, ZC3H12A, USP25, TNIP1	592	80	16881	2.13864	1	0.938175	91.7508
GOTERM_BP_DIRECT	GO:0006511~ubiquitin-dependent protein catabolic process	8	1.19403	0.467052	CUL3, ARIH2, USP5, USP1, PINK1, FBXO21, CHFR, USP25	596	182	16792	1.23844	1	0.99973	99.9986
GOTERM_BP_DIRECT	GO:0016579~protein deubiquitination	5	0.746269	0.467353	JOSD1, USP5, USP1, ZC3H12A, USP25	596	99	16792	1.42295	1	0.999721	99.9986
INTERPRO	IPR018200:Peptidase C19, ubiquitin carboxyl-terminal hydrolase 2, conserved site	3	0.447761	0.73707	USP5, USP1, USP25	634	76	18559	1.15551	1	0.999998	100
INTERPRO	IPR001394:Peptidase C19, ubiquitin carboxyl-terminal hydrolase 2	3	0.447761	0.762464	USP5, USP1, USP25	634	80	18559	1.09773	1	0.999999	100
Annotation Cluster 92	Enrichment Score: 0.3444009220256368
Category	Term	Count	%	PValue	Genes	List Total	Pop Hits	Pop Total	Fold Enrichment	Bonferroni	Benjamini	FDR
GOTERM_CC_DIRECT	GO:0000922~spindle pole	6	0.895522	0.307309	MAD1L1, NUMA1, MAD2L1, TPX2, CDC20, CALM1	616	109	18224	1.6285	1	0.859984	99.4275
KEGG_PATHWAY	hsa04114:Oocyte meiosis	6	0.895522	0.369249	ADCY3, MAD2L1, PPP3CC, PKMYT1, CDC20, CALM1	254	109	6910	1.49751	1	0.739578	99.7526
KEGG_PATHWAY	hsa04914:Progesterone-mediated oocyte maturation	5	0.746269	0.39519	ADCY3, MAD1L1, MAD2L1, PKMYT1, MAPK8	254	87	6910	1.56349	1	0.746743	99.8568
KEGG_PATHWAY	hsa04110:Cell cycle	6	0.895522	0.478265	E2F1, MAD1L1, MAD2L1, PKMYT1, CDC20, SFN	254	124	6910	1.31636	1	0.789649	99.9791
GOTERM_BP_DIRECT	GO:0007062~sister chromatid cohesion	3	0.447761	0.884352	MAD1L1, MAD2L1, CDC20	596	103	16792	0.820616	1	1	100
Annotation Cluster 93	Enrichment Score: 0.3436982778323979
Category	Term	Count	%	PValue	Genes	List Total	Pop Hits	Pop Total	Fold Enrichment	Bonferroni	Benjamini	FDR
GOTERM_BP_DIRECT	GO:0018108~peptidyl-tyrosine phosphorylation	8	1.19403	0.299543	EGFR, CSF2, BCR, TRIM27, CUX1, FGF2, MAP2K6, SRC	596	153	16792	1.47318	1	0.998112	99.8192
GOTERM_MF_DIRECT	GO:0004713~protein tyrosine kinase activity	7	1.04478	0.32262	EGFR, CSF2, BCR, CUX1, FGF2, MAP2K6, SRC	592	133	16881	1.5008	1	0.986696	99.762
GOTERM_BP_DIRECT	GO:0043406~positive regulation of MAP kinase activity	3	0.447761	0.623527	EGFR, FGF2, SRC	596	59	16792	1.4326	1	0.999969	100
UP_KEYWORDS	Tyrosine-protein kinase	4	0.597015	0.700165	EGFR, DDR1, MAP2K6, SRC	660	112	20581	1.11369	1	0.945372	100
Annotation Cluster 94	Enrichment Score: 0.34318098734871955
Category	Term	Count	%	PValue	Genes	List Total	Pop Hits	Pop Total	Fold Enrichment	Bonferroni	Benjamini	FDR
UP_SEQ_FEATURE	DNA-binding region:Homeobox	9	1.34328	0.285277	DLX1, HOXB2, LMX1B, DLX5, DLX4, LHX8, CUX1, ALX3, LBX2	655	191	20063	1.44332	1	0.999415	99.6912
UP_KEYWORDS	Homeobox	11	1.64179	0.335233	DLX1, HOXB2, MEIS2, LMX1B, DLX5, DLX4, MEIS3P1, LHX8, CUX1, ALX3, LBX2	660	262	20581	1.30922	1	0.790959	99.6574
INTERPRO	IPR001356:Homeodomain	11	1.64179	0.376619	DLX1, HOXB2, MEIS2, LMX1B, DLX5, DLX4, MEIS3P1, LHX8, CUX1, ALX3, LBX2	634	256	18559	1.25782	1	0.999064	99.95
INTERPRO	IPR017970:Homeobox, conserved site	8	1.19403	0.472069	DLX1, HOXB2, LMX1B, DLX5, DLX4, LHX8, CUX1, ALX3	634	190	18559	1.23254	1	0.99969	99.9965
SMART	SM00389:HOX	11	1.64179	0.482436	DLX1, HOXB2, MEIS2, LMX1B, DLX5, DLX4, MEIS3P1, LHX8, CUX1, ALX3, LBX2	384	250	10057	1.15236	1	0.994648	99.9827
INTERPRO	IPR000047:Helix-turn-helix motif	3	0.447761	0.501708	DLX1, DLX5, DLX4	634	49	18559	1.79222	1	0.99982	99.9986
INTERPRO	IPR020479:Homeodomain, metazoa	4	0.597015	0.611797	DLX1, HOXB2, DLX5, DLX4	634	92	18559	1.27273	1	0.999958	100
INTERPRO	IPR009057:Homeodomain-like	11	1.64179	0.713728	DLX1, HOXB2, MEIS2, LMX1B, DLX5, DLX4, MEIS3P1, LHX8, CUX1, ALX3, LBX2	634	336	18559	0.958338	1	0.999995	100
Annotation Cluster 95	Enrichment Score: 0.33303092754521335
Category	Term	Count	%	PValue	Genes	List Total	Pop Hits	Pop Total	Fold Enrichment	Bonferroni	Benjamini	FDR
UP_KEYWORDS	GTP-binding	14	2.08955	0.306566	GNA12, NPR1, RRAD, RASL12, DAPK1, TUBB, RAC3, RHOBTB2, RHOBTB1, RAB12, GNL1, DNM1, SEPT8, SEPT9	660	343	20581	1.27279	1	0.771386	99.3839
UP_SEQ_FEATURE	nucleotide phosphate-binding region:GTP	13	1.9403	0.315151	TUBB, MC1R, RAC3, GNA12, RHOBTB2, RHOBTB1, RRAD, RAB12, RASL12, GNL1, DNM1, SEPT8, SEPT9	655	310	20063	1.28451	1	0.999649	99.8519
GOTERM_MF_DIRECT	GO:0005525~GTP binding	16	2.38806	0.365155	GNA12, TPX2, NPR1, RRAD, RASL12, DAPK1, RNF112, TUBB, RAC3, RHOBTB2, RHOBTB1, RAB12, GNL1, DNM1, SEPT8, SEPT9	592	384	16881	1.18813	1	0.989085	99.9129
INTERPRO	IPR027417:P-loop containing nucleoside triphosphate hydrolase	33	4.92537	0.379142	COASY, SBNO2, PFKFB4, GNA12, RRAD, MYO9B, RAC3, KIF6, RHOBTB2, RHOBTB1, DLG5, GNL1, CHD4, RTEL1, RECQL5, AK5, MPP7, SPATA5L1, RASL12, ABCG4, NLRP1, DAPK1, RNF112, PNKP, MYO10, UCKL1, RAB12, DNM1, SEPT8, HS3ST3B1, KIF26B, SEPT9, IQCE	634	879	18559	1.09898	1	0.999036	99.9531
INTERPRO	IPR001806:Small GTPase superfamily	6	0.895522	0.515799	RAC3, RHOBTB2, RHOBTB1, RRAD, RAB12, RASL12	634	139	18559	1.26358	1	0.999861	99.9991
GOTERM_BP_DIRECT	GO:0007264~small GTPase mediated signal transduction	9	1.34328	0.647318	RALGPS1, RAC3, RHOBTB2, RHOBTB1, RRAD, RAB12, RASL12, DOCK4, BCAR3	596	246	16792	1.03077	1	0.999982	100
INTERPRO	IPR005225:Small GTP-binding protein domain	6	0.895522	0.67765	RAC3, RHOBTB2, RRAD, RAB12, RASL12, SEPT9	634	167	18559	1.05172	1	0.999988	100
GOTERM_MF_DIRECT	GO:0003924~GTPase activity	8	1.19403	0.715858	RNF112, TUBB, RAC3, GNA12, RRAD, GNL1, DNM1, SEPT9	592	234	16881	0.974879	1	0.999769	100
Annotation Cluster 96	Enrichment Score: 0.31741925938893717
Category	Term	Count	%	PValue	Genes	List Total	Pop Hits	Pop Total	Fold Enrichment	Bonferroni	Benjamini	FDR
UP_KEYWORDS	Fatty acid metabolism	6	0.895522	0.365242	SCD, PRKAG2, LYPLA2, ACSL6, ACOX3, HSD17B8	660	124	20581	1.50887	1	0.801225	99.8197
UP_KEYWORDS	Fatty acid biosynthesis	3	0.447761	0.499482	SCD, PRKAG2, HSD17B8	660	52	20581	1.79904	1	0.869281	99.9934
UP_KEYWORDS	Lipid metabolism	15	2.23881	0.524048	LDLR, SCD, PRKAG2, LYPLA2, SGMS1, PNPLA6, ACOX3, SERINC5, HMGCS2, INSIG1, HSD11B1, ACSL6, PLA2G4E, DHCR24, HSD17B8	660	433	20581	1.08025	1	0.883553	99.9967
UP_KEYWORDS	Lipid biosynthesis	6	0.895522	0.562148	SERINC5, HMGCS2, SCD, PRKAG2, DHCR24, HSD17B8	660	156	20581	1.19936	1	0.897107	99.999
Annotation Cluster 97	Enrichment Score: 0.3171250422381188
Category	Term	Count	%	PValue	Genes	List Total	Pop Hits	Pop Total	Fold Enrichment	Bonferroni	Benjamini	FDR
INTERPRO	IPR002957:Keratin, type I	3	0.447761	0.311113	KRT19, KRT40, KRT24	634	33	18559	2.66117	1	0.998004	99.7506
UP_SEQ_FEATURE	site:Stutter	3	0.447761	0.328846	KRT19, KRT40, LMNA	655	36	20063	2.55254	1	0.999727	99.8954
UP_SEQ_FEATURE	region of interest:Coil 2	4	0.597015	0.38277	KRT19, KRT40, LMNA, KRT24	655	68	20063	1.8018	1	0.999897	99.9753
UP_SEQ_FEATURE	region of interest:Linker 1	4	0.597015	0.435436	KRT19, KRT40, LMNA, KRT24	655	74	20063	1.6557	1	0.999963	99.9947
UP_SEQ_FEATURE	region of interest:Coil 1B	4	0.597015	0.435436	KRT19, KRT40, LMNA, KRT24	655	74	20063	1.6557	1	0.999963	99.9947
UP_SEQ_FEATURE	region of interest:Coil 1A	4	0.597015	0.435436	KRT19, KRT40, LMNA, KRT24	655	74	20063	1.6557	1	0.999963	99.9947
UP_SEQ_FEATURE	region of interest:Rod	4	0.597015	0.44406	KRT19, KRT40, LMNA, KRT24	655	75	20063	1.63363	1	0.999963	99.9959
UP_KEYWORDS	Intermediate filament	4	0.597015	0.449479	KRT19, KRT40, LMNA, KRT24	660	77	20581	1.61991	1	0.843117	99.9751
UP_SEQ_FEATURE	region of interest:Head	4	0.597015	0.461147	KRT19, KRT40, LMNA, KRT24	655	77	20063	1.5912	1	0.999974	99.9976
UP_SEQ_FEATURE	region of interest:Tail	4	0.597015	0.478003	KRT40, LMNA, MYO9B, KRT24	655	79	20063	1.55091	1	0.999982	99.9986
INTERPRO	IPR001664:Intermediate filament protein	4	0.597015	0.499789	KRT19, KRT40, LMNA, KRT24	634	78	18559	1.50117	1	0.999828	99.9985
GOTERM_CC_DIRECT	GO:0005882~intermediate filament	5	0.746269	0.532603	KRT19, PKP1, KRT40, LMNA, KRT24	616	113	18224	1.30904	1	0.947744	99.9977
SMART	SM01391:SM01391	4	0.597015	0.548473	KRT19, KRT40, LMNA, KRT24	384	75	10057	1.39681	1	0.997429	99.9971
INTERPRO	IPR018039:Intermediate filament protein, conserved site	3	0.447761	0.646778	KRT19, LMNA, KRT24	634	64	18559	1.37217	1	0.999981	100
UP_SEQ_FEATURE	region of interest:Linker 12	3	0.447761	0.654821	KRT19, KRT40, KRT24	655	68	20063	1.35135	1	0.999999	100
UP_KEYWORDS	Keratin	3	0.447761	0.958815	KRT19, KRT40, KRT24	660	153	20581	0.611438	1	0.998219	100
Annotation Cluster 98	Enrichment Score: 0.3041332983886962
Category	Term	Count	%	PValue	Genes	List Total	Pop Hits	Pop Total	Fold Enrichment	Bonferroni	Benjamini	FDR
BIOCARTA	h_tnfr1Pathway:TNFR1 Signaling Pathway	3	0.447761	0.439854	DFFB, LMNA, MAPK8	81	30	1625	2.00617	1	0.961448	99.926
BIOCARTA	h_fasPathway:FAS signaling pathway ( CD95 )	3	0.447761	0.473568	DFFB, LMNA, MAPK8	81	32	1625	1.88079	1	0.969847	99.9658
BIOCARTA	h_hivnefPathway:HIV-I Nef: negative effector of Fas and TNF	4	0.597015	0.587367	NUMA1, DFFB, LMNA, MAPK8	81	61	1625	1.31552	1	0.986901	99.9983
Annotation Cluster 99	Enrichment Score: 0.29974350691231155
Category	Term	Count	%	PValue	Genes	List Total	Pop Hits	Pop Total	Fold Enrichment	Bonferroni	Benjamini	FDR
GOTERM_BP_DIRECT	GO:0006366~transcription from RNA polymerase II promoter	21	3.13433	0.363457	BACH1, SCAF1, MAFF, BACH2, FOXJ2, RREB1, FOXK2, SPI1, GTF2H4, NFKB2, BATF, IRF9, MEF2D, FOS, MEIS2, ETS1, ARRB1, DLX5, MLLT1, NFIL3, NFATC1	596	513	16792	1.15334	1	0.998902	99.9669
GOTERM_MF_DIRECT	GO:0001077~transcriptional activator activity, RNA polymerase II core promoter proximal region sequence-specific binding	9	1.34328	0.587236	BATF, MEF2D, FOS, MEIS2, FOXJ2, DLX5, FOXK2, SPI1, NFKB2	592	236	16881	1.08744	1	0.998558	99.9999
GOTERM_MF_DIRECT	GO:0000978~RNA polymerase II core promoter proximal region sequence-specific DNA binding	13	1.9403	0.590886	BATF, MEF2D, FOS, MEIS2, FOXJ2, DLX5, DLX4, FOXK2, SPI1, GATAD2B, SKI, NFKB2, CHD4	592	355	16881	1.04422	1	0.998492	99.9999
Annotation Cluster 100	Enrichment Score: 0.29900664990862896
Category	Term	Count	%	PValue	Genes	List Total	Pop Hits	Pop Total	Fold Enrichment	Bonferroni	Benjamini	FDR
UP_KEYWORDS	Retinitis pigmentosa	6	0.895522	0.127235	DHDDS, PRCD, RBP3, CNGB1, PNPLA6, CDH23	660	83	20581	2.25422	1	0.564569	84.9213
GOTERM_BP_DIRECT	GO:0050896~response to stimulus	4	0.597015	0.377465	HMCN1, PRCD, SCNN1A, CDH23	596	62	16792	1.81771	1	0.999079	99.9777
UP_KEYWORDS	Vision	4	0.597015	0.717018	HMCN1, PRCD, CNGB1, CDH23	660	115	20581	1.08464	1	0.950693	100
GOTERM_BP_DIRECT	GO:0007601~visual perception	5	0.746269	0.929115	HMCN1, PRCD, RBP3, CNGB1, CDH23	596	201	16792	0.700858	1	1	100
UP_KEYWORDS	Sensory transduction	8	1.19403	0.999732	ADCY3, CRY2, HMCN1, TAS2R4, PRCD, CNGB1, SCNN1A, CDH23	660	609	20581	0.409633	1	1	100
Annotation Cluster 101	Enrichment Score: 0.2876903616564735
Category	Term	Count	%	PValue	Genes	List Total	Pop Hits	Pop Total	Fold Enrichment	Bonferroni	Benjamini	FDR
UP_SEQ_FEATURE	domain:Sushi 1	3	0.447761	0.43381	PAMR1, C4BPB, PAPPA2	655	45	20063	2.04204	1	0.999964	99.9944
UP_SEQ_FEATURE	domain:Sushi 2	3	0.447761	0.43381	PAMR1, C4BPB, PAPPA2	655	45	20063	2.04204	1	0.999964	99.9944
UP_KEYWORDS	Sushi	3	0.447761	0.539278	PAMR1, C4BPB, PAPPA2	660	56	20581	1.67054	1	0.892257	99.9979
INTERPRO	IPR000436:Sushi/SCR/CCP	3	0.447761	0.583614	PAMR1, C4BPB, PAPPA2	634	57	18559	1.54068	1	0.999944	99.9999
SMART	SM00032:CCP	3	0.447761	0.615194	PAMR1, C4BPB, PAPPA2	384	54	10057	1.45501	1	0.998414	99.9996
Annotation Cluster 102	Enrichment Score: 0.2873204828930552
Category	Term	Count	%	PValue	Genes	List Total	Pop Hits	Pop Total	Fold Enrichment	Bonferroni	Benjamini	FDR
INTERPRO	IPR013761:Sterile alpha motif/pointed domain	6	0.895522	0.369241	PPFIA3, PPFIA4, DGKD, ETS1, SGMS1, SHANK2	634	117	18559	1.50117	1	0.999069	99.9396
INTERPRO	IPR001660:Sterile alpha motif domain	5	0.746269	0.399718	PPFIA3, PPFIA4, DGKD, SGMS1, SHANK2	634	94	18559	1.55707	1	0.999156	99.9728
SMART	SM00454:SAM	4	0.597015	0.633786	PPFIA3, PPFIA4, DGKD, SHANK2	384	85	10057	1.23248	1	0.998432	99.9998
UP_SEQ_FEATURE	domain:SAM	3	0.447761	0.758074	DGKD, SGMS1, SHANK2	655	83	20063	1.10713	1	1	100
Annotation Cluster 103	Enrichment Score: 0.28706522136979046
Category	Term	Count	%	PValue	Genes	List Total	Pop Hits	Pop Total	Fold Enrichment	Bonferroni	Benjamini	FDR
UP_SEQ_FEATURE	DNA-binding region:Fork-head	3	0.447761	0.488238	FOXK1, FOXJ2, FOXK2	655	50	20063	1.83783	1	0.99998	99.999
INTERPRO	IPR001766:Transcription factor, fork head	3	0.447761	0.501708	FOXK1, FOXJ2, FOXK2	634	49	18559	1.79222	1	0.99982	99.9986
SMART	SM00339:FH	3	0.447761	0.561982	FOXK1, FOXJ2, FOXK2	384	49	10057	1.60348	1	0.997164	99.9981
Annotation Cluster 104	Enrichment Score: 0.28656315112234093
Category	Term	Count	%	PValue	Genes	List Total	Pop Hits	Pop Total	Fold Enrichment	Bonferroni	Benjamini	FDR
UP_SEQ_FEATURE	repeat:LRR 15	4	0.597015	0.23127	PODNL1, LRIG1, LGR4, TLR9	655	51	20063	2.40239	1	0.998888	98.9182
UP_SEQ_FEATURE	repeat:LRR 14	4	0.597015	0.311116	PODNL1, LRIG1, LGR4, TLR9	655	60	20063	2.04204	1	0.999634	99.8361
UP_SEQ_FEATURE	repeat:LRR 6	9	1.34328	0.374749	PXDN, PODNL1, RTN4RL1, LRIG1, LRRC17, TSKU, LGR4, NLRP1, TLR9	655	209	20063	1.31902	1	0.999889	99.9691
INTERPRO	IPR003591:Leucine-rich repeat, typical subtype	8	1.19403	0.405332	PXDN, PODNL1, RTN4RL1, LRIG1, LRRC17, TSKU, LGR4, TLR9	634	178	18559	1.31563	1	0.999122	99.9766
UP_SEQ_FEATURE	repeat:LRR 16	3	0.447761	0.43381	PODNL1, LRIG1, TLR9	655	45	20063	2.04204	1	0.999964	99.9944
UP_SEQ_FEATURE	repeat:LRR 13	4	0.597015	0.44406	PODNL1, LRIG1, LGR4, TLR9	655	75	20063	1.63363	1	0.999963	99.9959
UP_SEQ_FEATURE	repeat:LRR 5	9	1.34328	0.484322	PXDN, PODNL1, RTN4RL1, LRIG1, LRRC17, TSKU, LGR4, NLRP1, TLR9	655	231	20063	1.1934	1	0.999981	99.9989
UP_SEQ_FEATURE	repeat:LRR 7	7	1.04478	0.513798	PODNL1, RTN4RL1, LRIG1, TSKU, LGR4, NLRP1, TLR9	655	176	20063	1.21826	1	0.999988	99.9996
SMART	SM00369:LRR_TYP	8	1.19403	0.520187	PXDN, PODNL1, RTN4RL1, LRIG1, LRRC17, TSKU, LGR4, TLR9	384	178	10057	1.17708	1	0.996535	99.9936
UP_SEQ_FEATURE	repeat:LRR 8	6	0.895522	0.531194	PODNL1, RTN4RL1, LRIG1, TSKU, LGR4, TLR9	655	148	20063	1.24178	1	0.999992	99.9998
UP_KEYWORDS	Leucine-rich repeat	11	1.64179	0.539689	PXDN, PODNL1, RTN4RL1, LRIG1, CMIP, LRRC17, TSKU, LGR4, NLRP1, FBXL18, TLR9	660	311	20581	1.10295	1	0.89077	99.9979
INTERPRO	IPR000483:Cysteine-rich flanking region, C-terminal	4	0.597015	0.541722	PXDN, RTN4RL1, LRIG1, LRRC17	634	83	18559	1.41074	1	0.999895	99.9996
INTERPRO	IPR001611:Leucine-rich repeat	10	1.49254	0.543552	PXDN, PODNL1, RTN4RL1, LRIG1, LRRC17, TSKU, LGR4, NLRP1, FBXL17, TLR9	634	263	18559	1.11304	1	0.99989	99.9997
UP_SEQ_FEATURE	repeat:LRR 12	4	0.597015	0.565824	PODNL1, LRIG1, LGR4, TLR9	655	90	20063	1.36136	1	0.999997	99.9999
UP_SEQ_FEATURE	repeat:LRR 4	9	1.34328	0.593744	PXDN, PODNL1, RTN4RL1, LRIG1, LRRC17, TSKU, LGR4, NLRP1, TLR9	655	255	20063	1.08108	1	0.999999	100
SMART	SM00082:LRRCT	4	0.597015	0.617653	PXDN, RTN4RL1, LRIG1, LRRC17	384	83	10057	1.26217	1	0.99822	99.9997
UP_SEQ_FEATURE	repeat:LRR 9	5	0.746269	0.639749	PODNL1, LRIG1, TSKU, LGR4, TLR9	655	134	20063	1.14293	1	0.999999	100
UP_SEQ_FEATURE	repeat:LRR 11	4	0.597015	0.643996	PODNL1, LRIG1, LGR4, TLR9	655	101	20063	1.21309	1	0.999999	100
UP_SEQ_FEATURE	repeat:LRR 3	10	1.49254	0.654563	PXDN, PODNL1, RTN4RL1, LRIG1, LRRC17, TSKU, LGR4, NLRP1, FBXL18, TLR9	655	302	20063	1.01426	1	1	100
UP_SEQ_FEATURE	repeat:LRR 1	10	1.49254	0.72309	PXDN, PODNL1, RTN4RL1, LRIG1, LRRC17, TSKU, LGR4, NLRP1, FBXL18, TLR9	655	321	20063	0.954222	1	1	100
UP_SEQ_FEATURE	repeat:LRR 2	10	1.49254	0.726434	PXDN, PODNL1, RTN4RL1, LRIG1, LRRC17, TSKU, LGR4, NLRP1, FBXL18, TLR9	655	322	20063	0.951259	1	1	100
UP_SEQ_FEATURE	repeat:LRR 10	4	0.597015	0.733704	PODNL1, LRIG1, LGR4, TLR9	655	116	20063	1.05623	1	1	100
Annotation Cluster 105	Enrichment Score: 0.27905555000416193
Category	Term	Count	%	PValue	Genes	List Total	Pop Hits	Pop Total	Fold Enrichment	Bonferroni	Benjamini	FDR
UP_SEQ_FEATURE	repeat:Solcar 3	3	0.447761	0.498726	SLC25A38, SLC25A18, SLC25A17	655	51	20063	1.8018	1	0.999983	99.9993
GOTERM_MF_DIRECT	GO:0003735~structural constituent of ribosome	9	1.34328	0.511936	MRPL1, RPL19, RPL13, SLC25A38, RPL27A, RPL23A, RPL38, SLC25A18, SLC25A17	592	222	16881	1.15602	1	0.996802	99.9985
UP_SEQ_FEATURE	repeat:Solcar 1	3	0.447761	0.529351	SLC25A38, SLC25A18, SLC25A17	655	54	20063	1.7017	1	0.999992	99.9998
UP_SEQ_FEATURE	repeat:Solcar 2	3	0.447761	0.529351	SLC25A38, SLC25A18, SLC25A17	655	54	20063	1.7017	1	0.999992	99.9998
INTERPRO	IPR023395:Mitochondrial carrier domain	3	0.447761	0.54394	SLC25A38, SLC25A18, SLC25A17	634	53	18559	1.65695	1	0.999881	99.9997
INTERPRO	IPR018108:Mitochondrial substrate/solute carrier	3	0.447761	0.54394	SLC25A38, SLC25A18, SLC25A17	634	53	18559	1.65695	1	0.999881	99.9997
Annotation Cluster 106	Enrichment Score: 0.2727911667537367
Category	Term	Count	%	PValue	Genes	List Total	Pop Hits	Pop Total	Fold Enrichment	Bonferroni	Benjamini	FDR
GOTERM_MF_DIRECT	GO:0004842~ubiquitin-protein transferase activity	14	2.08955	0.354037	BACH1, BACH2, RNF220, TRIM27, WSB1, CUL3, KLHL29, ARIH2, MGRN1, KBTBD3, FBXO21, CHFR, TNFAIP1, UNKL	592	329	16881	1.21341	1	0.988893	99.886
GOTERM_BP_DIRECT	GO:0000209~protein polyubiquitination	8	1.19403	0.478486	WSB1, CUL3, ARIH2, MGRN1, RUSC1, PSME4, CHFR, UNKL	596	184	16792	1.22498	1	0.99974	99.999
GOTERM_MF_DIRECT	GO:0061630~ubiquitin protein ligase activity	5	0.746269	0.896826	CUL3, ARIH2, RNF220, MGRN1, CHFR	592	187	16881	0.762439	1	0.999999	100
Annotation Cluster 107	Enrichment Score: 0.2639046623500626
Category	Term	Count	%	PValue	Genes	List Total	Pop Hits	Pop Total	Fold Enrichment	Bonferroni	Benjamini	FDR
UP_SEQ_FEATURE	site:Reactive bond	3	0.447761	0.43381	SERPINE3, SERPINC1, APLP2	655	45	20063	2.04204	1	0.999964	99.9944
GOTERM_MF_DIRECT	GO:0004867~serine-type endopeptidase inhibitor activity	5	0.746269	0.442524	SERPINF1, SERPINE3, SERPINC1, ITIH3, APLP2	592	97	16881	1.46986	1	0.994245	99.9884
UP_KEYWORDS	Serine protease inhibitor	4	0.597015	0.522773	SERPINE3, SERPINC1, ITIH3, APLP2	660	86	20581	1.45039	1	0.884509	99.9966
GOTERM_BP_DIRECT	GO:0010951~negative regulation of endopeptidase activity	5	0.746269	0.625615	SERPINF1, SERPINE3, SERPINC1, ITIH3, APLP2	596	121	16792	1.16424	1	0.99997	100
UP_KEYWORDS	Protease inhibitor	4	0.597015	0.763169	SERPINE3, SERPINC1, ITIH3, APLP2	660	124	20581	1.00591	1	0.964999	100
Annotation Cluster 108	Enrichment Score: 0.2601679450923743
Category	Term	Count	%	PValue	Genes	List Total	Pop Hits	Pop Total	Fold Enrichment	Bonferroni	Benjamini	FDR
BIOCARTA	h_tollPathway:Toll-Like Receptor Pathway	4	0.597015	0.286845	FOS, MAPK8, MAP2K6, TLR9	81	38	1625	2.11176	1	0.900344	98.5083
KEGG_PATHWAY	hsa05142:Chagas disease (American trypanosomiasis)	6	0.895522	0.3326	FOS, TGFBR1, CD247, MAPK8, PPP2R2B, TLR9	254	104	6910	1.5695	1	0.714224	99.4837
BIOCARTA	h_mapkPathway:MAPKinase Signaling Pathway	5	0.746269	0.631952	MEF2D, FOS, TGFBR1, MAPK8, MAP2K6	81	87	1625	1.15297	1	0.990499	99.9996
KEGG_PATHWAY	hsa04668:TNF signaling pathway	4	0.597015	0.751616	CSF2, FOS, MAPK8, MAP2K6	254	106	6910	1.02659	1	0.927233	100
KEGG_PATHWAY	hsa04620:Toll-like receptor signaling pathway	4	0.597015	0.751616	FOS, MAPK8, MAP2K6, TLR9	254	106	6910	1.02659	1	0.927233	100
KEGG_PATHWAY	hsa05168:Herpes simplex infection	6	0.895522	0.806762	IRF9, FOS, MAPK8, TAF6L, HLA-E, TLR9	254	183	6910	0.891958	1	0.949328	100
Annotation Cluster 109	Enrichment Score: 0.2210874837715601
Category	Term	Count	%	PValue	Genes	List Total	Pop Hits	Pop Total	Fold Enrichment	Bonferroni	Benjamini	FDR
INTERPRO	IPR018957:Zinc finger, C3HC4 RING-type	3	0.447761	0.32377	RNF112, DTX2, MKRN2	634	34	18559	2.5829	1	0.99824	99.8149
INTERPRO	IPR013083:Zinc finger, RING/FYVE/PHD-type	18	2.68657	0.379933	BRD1, RNF220, USP5, DTX2, TRIM27, MARCH10, ZMYND8, DIDO1, MKRN2, RNF112, ARIH2, MGRN1, ZMIZ1, KDM4B, ZNF598, CHFR, MLLT6, CHD4	634	453	18559	1.16316	1	0.998968	99.9541
UP_SEQ_FEATURE	zinc finger region:RING-type	9	1.34328	0.478029	RNF112, RNF220, MGRN1, DTX2, TRIM27, ZNF598, CHFR, UNKL, MKRN2	655	230	20063	1.19859	1	0.99998	99.9986
UP_KEYWORDS	Ligase	12	1.79104	0.556522	RNF220, MGRN1, DTX2, GARS, TRIM27, SAE1, MARCH10, CHFR, VARS, ACSL6, UNKL, MKRN2	660	347	20581	1.07839	1	0.895104	99.9988
GOTERM_MF_DIRECT	GO:0016874~ligase activity	10	1.49254	0.606987	ARIH2, RNF220, MGRN1, DTX2, TRIM27, MARCH10, CHFR, ACSL6, UNKL, MKRN2	592	270	16881	1.05612	1	0.998808	99.9999
INTERPRO	IPR001841:Zinc finger, RING-type	10	1.49254	0.679904	RNF112, ARIH2, RNF220, MGRN1, DTX2, TRIM27, ZNF598, CHFR, UNKL, MKRN2	634	295	18559	0.992301	1	0.999988	100
GOTERM_MF_DIRECT	GO:0061630~ubiquitin protein ligase activity	5	0.746269	0.896826	CUL3, ARIH2, RNF220, MGRN1, CHFR	592	187	16881	0.762439	1	0.999999	100
SMART	SM00184:RING	7	1.04478	0.908046	RNF112, ARIH2, MGRN1, DTX2, TRIM27, CHFR, MKRN2	384	244	10057	0.751355	1	0.999998	100
INTERPRO	IPR017907:Zinc finger, RING-type, conserved site	4	0.597015	0.930869	ARIH2, TRIM27, CHFR, MKRN2	634	169	18559	0.692849	1	1	100
Annotation Cluster 110	Enrichment Score: 0.22051514463735677
Category	Term	Count	%	PValue	Genes	List Total	Pop Hits	Pop Total	Fold Enrichment	Bonferroni	Benjamini	FDR
INTERPRO	IPR001245:Serine-threonine/tyrosine-protein kinase catalytic domain	8	1.19403	0.202059	EGFR, DDR1, ACVRL1, NEK3, TGFBR1, NPR1, SRC, NRBP2	634	140	18559	1.67274	1	0.991118	97.3489
UP_KEYWORDS	Tyrosine-protein kinase	4	0.597015	0.700165	EGFR, DDR1, MAP2K6, SRC	660	112	20581	1.11369	1	0.945372	100
INTERPRO	IPR020635:Tyrosine-protein kinase, catalytic domain	3	0.447761	0.791193	EGFR, DDR1, SRC	634	85	18559	1.03316	1	1	100
INTERPRO	IPR008266:Tyrosine-protein kinase, active site	3	0.447761	0.839584	EGFR, DDR1, SRC	634	95	18559	0.924406	1	1	100
SMART	SM00219:TyrKc	3	0.447761	0.840233	EGFR, DDR1, SRC	384	85	10057	0.924357	1	0.999973	100
Annotation Cluster 111	Enrichment Score: 0.1981966078882614
Category	Term	Count	%	PValue	Genes	List Total	Pop Hits	Pop Total	Fold Enrichment	Bonferroni	Benjamini	FDR
GOTERM_BP_DIRECT	GO:0014066~regulation of phosphatidylinositol 3-kinase signaling	4	0.597015	0.525613	EGFR, GAB1, FGF2, CEACAM1	596	78	16792	1.44485	1	0.999863	99.9998
GOTERM_MF_DIRECT	GO:0046934~phosphatidylinositol-4,5-bisphosphate 3-kinase activity	3	0.447761	0.643896	EGFR, GAB1, FGF2	592	62	16881	1.37977	1	0.999165	100
GOTERM_BP_DIRECT	GO:0046854~phosphatidylinositol phosphorylation	4	0.597015	0.652209	EGFR, GAB1, FGF2, EFR3B	596	94	16792	1.19891	1	0.999983	100
GOTERM_BP_DIRECT	GO:0048015~phosphatidylinositol-mediated signaling	4	0.597015	0.730038	EGFR, PRR5, GAB1, FGF2	596	106	16792	1.06319	1	0.999997	100
Annotation Cluster 112	Enrichment Score: 0.19539684508470503
Category	Term	Count	%	PValue	Genes	List Total	Pop Hits	Pop Total	Fold Enrichment	Bonferroni	Benjamini	FDR
UP_SEQ_FEATURE	domain:SCAN box	3	0.447761	0.58668	ZSCAN22, ZNF446, ZNF165	655	60	20063	1.53153	1	0.999998	100
INTERPRO	IPR003309:Transcription regulator SCAN	3	0.447761	0.61166	ZSCAN22, ZNF446, ZNF165	634	60	18559	1.46364	1	0.999962	100
SMART	SM00431:SCAN	3	0.447761	0.663318	ZSCAN22, ZNF446, ZNF165	384	59	10057	1.3317	1	0.998925	99.9999
INTERPRO	IPR008916:Retrovirus capsid, C-terminal	3	0.447761	0.694671	ZSCAN22, ZNF446, ZNF165	634	70	18559	1.25455	1	0.999991	100
Annotation Cluster 113	Enrichment Score: 0.1953538214223717
Category	Term	Count	%	PValue	Genes	List Total	Pop Hits	Pop Total	Fold Enrichment	Bonferroni	Benjamini	FDR
INTERPRO	IPR018247:EF-Hand 1, calcium-binding site	8	1.19403	0.405332	FKBP9, NKD1, CAPN11, CAPN12, S100A9, FKBP10, CAPN2, CALM1	634	178	18559	1.31563	1	0.999122	99.9766
UP_SEQ_FEATURE	calcium-binding region:2	5	0.746269	0.539317	FKBP9, CAPN11, FKBP10, CAPN2, CALM1	655	118	20063	1.2979	1	0.999993	99.9998
UP_SEQ_FEATURE	calcium-binding region:1	5	0.746269	0.603799	FKBP9, CAPN11, FKBP10, CAPN2, CALM1	655	128	20063	1.19651	1	0.999999	100
INTERPRO	IPR002048:EF-hand domain	8	1.19403	0.663961	FKBP9, NKD1, CAPN11, CAPN12, S100A9, FKBP10, CAPN2, CALM1	634	228	18559	1.02712	1	0.999983	100
UP_SEQ_FEATURE	domain:EF-hand 1	6	0.895522	0.724702	FKBP9, CAPN11, S100A9, FKBP10, CAPN2, CALM1	655	185	20063	0.993423	1	1	100
UP_SEQ_FEATURE	domain:EF-hand 2	6	0.895522	0.724702	FKBP9, CAPN11, S100A9, FKBP10, CAPN2, CALM1	655	185	20063	0.993423	1	1	100
INTERPRO	IPR011992:EF-hand-like domain	9	1.34328	0.739463	FKBP9, NKD1, TBC1D8, CAPN11, CAPN12, S100A9, FKBP10, CAPN2, CALM1	634	279	18559	0.944286	1	0.999998	100
SMART	SM00054:EFh	5	0.746269	0.803979	FKBP9, CAPN11, S100A9, FKBP10, CALM1	384	144	10057	0.909379	1	0.99993	100
Annotation Cluster 114	Enrichment Score: 0.19107403313575072
Category	Term	Count	%	PValue	Genes	List Total	Pop Hits	Pop Total	Fold Enrichment	Bonferroni	Benjamini	FDR
UP_KEYWORDS	Membrane	258	38.5075	0.0871567	LYPD2, ADCY3, SLC36A2, LDHA, RUSC1, S100A9, VPS52, SGMS1, SYT7, MED28, MC1R, HTRA2, PRRT3, CCR10, INSIG1, C6ORF136, TMEM14C, CDH23, GNG7, DAB2IP, BCR, PTPRF, NCF4, VANGL2, SIRPA, BCL2L11, LHFPL3, PITPNM1, SSTR2, CCR7, HAS1, HSD11B1, TMEM184A, RAB12, BIN2, CALHM3, HS3ST3B1, BLCAP, ALDOA, RALGPS1, MTX1, PTH1R, ASAP2, AKAP13, SYPL2, SORCS2, CD68, SERINC5, RAC3, PPP2R2B, IL1RAPL1, TGFBR1, SCD, OSBPL7…	660	7494	20581	1.07357	1	0.502983	71.8529
UP_SEQ_FEATURE	topological domain:Cytoplasmic	111	16.5672	0.626528	ADCY3, SLC36A2, LMAN2L, JAG2, SGMS1, SYT7, CNGB1, VIPR1, TAPBP, TLR9, SLC16A1, DYSF, MC1R, PRRT3, CCR10, INSIG1, SLC2A1, CSF3R, CDH23, EGFR, ATG9B, PTPRF, VANGL2, HLA-E, SIRPA, PNPLA6, SLC34A2, SSTR2, CCR7, HAS1, HSD11B1, HS3ST3B1, PLXNC1, PTH1R, LRIG1, SYPL2, SORCS2, PAQR5, CD68, SERINC5, P2RY6, SCARB1, IL1RAPL1, SEC61A1, TGFBR1, SPPL2B, ITGA1, GPR137B, CACNA2D3, ABCG4, ITGA9, B3GAT3, NOTCH4, TG…	655	3456	20063	0.983793	1	0.999999	100
UP_SEQ_FEATURE	topological domain:Extracellular	85	12.6866	0.799855	SLC16A13, CLDN7, IGDCC3, SLC36A2, ACVRL1, TAS2R4, LDLR, TRPV1, JAG2, CNGB1, VIPR1, LGR4, MMP24, PCDHGA1, TLR9, PCDH1, SLC16A1, SLC1A3, DYSF, MC1R, PRRT3, SLC2A1, CCR10, CSF3R, TRPV4, CNTNAP1, SV2B, ANO4, BOC, CEACAM1, CDH23, EGFR, TRPM4, KCNMA1, STX1A, PTPRF, VANGL2, HLA-E, LDLRAD3, SIRPA, SLC34A2, DDR1, SSTR2, CCR7, HAS1, CD82, TNFRSF21, PARD3, PLXNC1, CD247, PTH1R, LRIG1, APLP2, PAQR5, NETO1, C…	655	2787	20063	0.934193	1	1	100
UP_SEQ_FEATURE	glycosylation site:N-linked (GlcNAc...)	130	19.403	0.822801	LYPD2, ADCY3, LTBP2, JAG2, VIPR1, TAPBP, TLR9, HMCN1, MC1R, PRRT3, SERPINE3, SLC2A1, CSF3R, CDH23, EGFR, WNT10B, STC2, PTPRF, SCUBE3, ADAMTS20, HLA-E, SIRPA, PNPLA6, SLC34A2, SSTR2, CCR7, EGFLAM, SERPINF1, HSD11B1, LAMC2, EMP1, HS3ST3B1, PLXNC1, C6ORF120, RBP3, PTH1R, PAMR1, UNC93B1, LRIG1, SYPL2, SORCS2, CD68, SERINC5, P2RY6, SCARB1, IL1RAPL1, TGFBR1, ITGA1, GPR137B, CACNA2D3, TINAGL1, COL16A1, …	655	4234	20063	0.940475	1	1	100
UP_SEQ_FEATURE	transmembrane region	153	22.8358	0.889272	ADCY3, SLC36A2, RNASEK, LMAN2L, JAG2, ROMO1, CNGB1, SGMS1, SYT7, VIPR1, TLR9, TAPBP, SLC16A1, DYSF, MC1R, HTRA2, PRRT3, SLC2A1, INSIG1, CCR10, CSF3R, TMEM14C, FNDC3B, CDH23, EGFR, ATG9B, PTPRF, VANGL2, HLA-E, SIRPA, PNPLA6, SLC34A2, LHFPL3, SSTR2, CCR7, PRCD, HAS1, HSD11B1, SLC25A38, TMEM184A, CALHM3, HS3ST3B1, EMP1, BLCAP, PLXNC1, MTX1, PTH1R, UNC93B1, LRIG1, SYPL2, SORCS2, PAQR5, CD68, P2RY6, S…	655	5056	20063	0.926913	1	1	100
UP_KEYWORDS	Transmembrane helix	162	24.1791	0.962573	ADCY3, SLC36A2, LDHA, RNASEK, LMAN2L, JAG2, ROMO1, CNGB1, SGMS1, SYT7, VIPR1, TLR9, TAPBP, SLC16A1, DYSF, MC1R, HTRA2, PRRT3, SLC2A1, INSIG1, CCR10, CSF3R, C6ORF136, TMEM14C, FNDC3B, CDH23, EGFR, ATG9B, PTPRF, VANGL2, HLA-E, SIRPA, PNPLA6, SLC34A2, LHFPL3, SSTR2, CCR7, PRCD, HAS1, HSD11B1, SLC25A38, TMEM184A, CALHM3, HS3ST3B1, EMP1, BLCAP, ALDOA, PLXNC1, MTX1, PTH1R, UNC93B1, LRIG1, SYPL2, SORCS2…	660	5634	20581	0.896645	1	0.998376	100
UP_KEYWORDS	Transmembrane	162	24.1791	0.966305	ADCY3, SLC36A2, LDHA, RNASEK, LMAN2L, JAG2, ROMO1, CNGB1, SGMS1, SYT7, VIPR1, TLR9, TAPBP, SLC16A1, DYSF, MC1R, HTRA2, PRRT3, SLC2A1, INSIG1, CCR10, CSF3R, C6ORF136, TMEM14C, FNDC3B, CDH23, EGFR, ATG9B, PTPRF, VANGL2, HLA-E, SIRPA, PNPLA6, SLC34A2, LHFPL3, SSTR2, CCR7, PRCD, HAS1, HSD11B1, SLC25A38, TMEM184A, CALHM3, HS3ST3B1, EMP1, BLCAP, ALDOA, PLXNC1, MTX1, PTH1R, UNC93B1, LRIG1, SYPL2, SORCS2…	660	5651	20581	0.893948	1	0.998633	100
GOTERM_CC_DIRECT	GO:0016021~integral component of membrane	147	21.9403	0.996042	ADCY3, LDHA, SLC36A2, RNASEK, LMAN2L, ROMO1, SGMS1, SYT7, VIPR1, TLR9, TAPBP, SLC16A1, DYSF, MC1R, HTRA2, PRRT3, SLC2A1, INSIG1, CCR10, CSF3R, C6ORF136, TMEM14C, FNDC3B, CDH23, EGFR, ATG9B, PTPRF, VANGL2, HLA-E, SIRPA, PNPLA6, SLC34A2, LHFPL3, CCR7, PRCD, HAS1, HSD11B1, SLC25A38, TMEM184A, EMP1, BLCAP, MTX1, PTH1R, UNC93B1, LRIG1, SYPL2, SORCS2, PAQR5, CD68, P2RY6, SERINC5, SCARB1, IL1RAPL1, SEC6…	616	5163	18224	0.842322	1	1	100
Annotation Cluster 115	Enrichment Score: 0.18398517987747798
Category	Term	Count	%	PValue	Genes	List Total	Pop Hits	Pop Total	Fold Enrichment	Bonferroni	Benjamini	FDR
UP_SEQ_FEATURE	signal peptide	117	17.4627	0.243364	LYPD2, LTBP2, LMAN2L, JAG2, BPHL, VIPR1, TAPBP, TLR9, HMCN1, GCOM1, PRRT3, SERPINE3, CSF3R, CDH23, EGFR, RNLS, WNT10B, STC2, PTPRF, SCUBE3, ADAMTS20, HLA-E, SIRPA, CCR7, LYNX1, EGFLAM, SERPINF1, LAMC2, PLXNC1, C6ORF120, RBP3, PTH1R, PAMR1, LRIG1, CNPY4, FAM19A3, SORCS2, CD68, ACTR3C, IL1RAPL1, TGFBR1, ITGA1, CACNA2D3, TINAGL1, COL16A1, NTN1, LCN2, DNASE1, ITGA9, LAMA5, NOTCH4, TGFBR3, ANTXR2, PAP…	655	3346	20063	1.07106	1	0.998951	99.1766
UP_KEYWORDS	Glycoprotein	142	21.194	0.68861	LYPD2, ADCY3, LTBP2, LMAN2L, JAG2, VIPR1, TLR9, TAPBP, HMCN1, MC1R, PRRT3, SERPINE3, SLC2A1, CSF3R, CDH23, EGFR, WNT10B, STC2, PTPRF, SCUBE3, ADAMTS20, HLA-E, SIRPA, PNPLA6, SLC34A2, SSTR2, CCR7, LYNX1, EGFLAM, SERPINF1, HSD11B1, LAMC2, HS3ST3B1, EMP1, PLXNC1, C6ORF120, RBP3, PAMR1, PTH1R, UNC93B1, LRIG1, SYPL2, SORCS2, CD68, P2RY6, SERINC5, RAC3, SCARB1, IL1RAPL1, TGFBR1, SPPL2B, ITGA1, GPR137B,…	660	4551	20581	0.97298	1	0.942222	100
UP_KEYWORDS	Signal	128	19.1045	0.743959	LYPD2, LTBP2, LMAN2L, JAG2, BPHL, VIPR1, TLR9, TAPBP, HMCN1, GCOM1, PRRT3, SERPINE3, CSF3R, CDH23, EGFR, RNLS, WNT10B, STC2, PTPRF, SCUBE3, ADAMTS20, HLA-E, SIRPA, CCR7, LYNX1, EGFLAM, SERPINF1, LAMC2, COASY, PLXNC1, C6ORF120, RBP3, PTH1R, PAMR1, LRIG1, CNPY4, FAM19A3, SORCS2, CD68, ACTR3C, IL1RAPL1, TGFBR1, SPPL2B, GARS, ITGA1, CACNA2D3, TINAGL1, COL16A1, NTN1, LCN2, DNASE1, ITGA9, IFI27, LAMA5,…	660	4160	20581	0.959487	1	0.958822	100
UP_SEQ_FEATURE	glycosylation site:N-linked (GlcNAc...)	130	19.403	0.822801	LYPD2, ADCY3, LTBP2, JAG2, VIPR1, TAPBP, TLR9, HMCN1, MC1R, PRRT3, SERPINE3, SLC2A1, CSF3R, CDH23, EGFR, WNT10B, STC2, PTPRF, SCUBE3, ADAMTS20, HLA-E, SIRPA, PNPLA6, SLC34A2, SSTR2, CCR7, EGFLAM, SERPINF1, HSD11B1, LAMC2, EMP1, HS3ST3B1, PLXNC1, C6ORF120, RBP3, PTH1R, PAMR1, UNC93B1, LRIG1, SYPL2, SORCS2, CD68, SERINC5, P2RY6, SCARB1, IL1RAPL1, TGFBR1, ITGA1, GPR137B, CACNA2D3, TINAGL1, COL16A1, …	655	4234	20063	0.940475	1	1	100
UP_KEYWORDS	Disulfide bond	101	15.0746	0.867201	LTBP2, LMAN2L, JAG2, VIPR1, TAPBP, HMCN1, CCR10, CSF3R, HMGCL, EGFR, WNT10B, STC2, SCUBE3, PTPRF, ADAMTS20, HLA-E, SIRPA, SLC34A2, SSTR2, CCR7, EGFLAM, LYNX1, LAMC2, HS3ST3B1, PLXNC1, PTH1R, PAMR1, LRIG1, CNPY4, P2RY6, CD68, OBSL1, SCARB1, IL1RAPL1, TGFBR1, ITGA1, TINAGL1, CACNA2D3, NTN1, LCN2, DNASE1, ITGA9, B3GAT3, LAMA5, NOTCH4, TGFBR3, ANTXR2, PAPPA2, CACNA1C, CHRNG, SEL1L, IGDCC3, PXDN, ACVR…	660	3434	20581	0.917157	1	0.987238	100
UP_SEQ_FEATURE	disulfide bond	86	12.8358	0.884903	IGDCC3, PXDN, SLURP1, LDLR, LTBP2, IGFBP7, LMAN2L, JAG2, PRDX3, PDIA4, VIPR1, LGR4, MMP25, TAPBP, MMP24, WISP1, HMCN1, CCR10, CSF3R, LTF, SEMA3B, CNTNAP1, BOC, CEACAM1, RTEL1, EGFR, PTPRF, SCUBE3, ADAMTS20, CLIC1, HLA-E, LDLRAD3, PALLD, SIRPA, ST6GALNAC1, SLC34A2, DDR1, SSTR2, CCR7, TNFRSF10C, EGFLAM, LYNX1, LAMC2, EGFL8, HS3ST3B1, CSF2, TNFRSF21, CD247, PTH1R, PAMR1, LRIG1, CNPY4, APLP2, CPZ, NE…	655	2917	20063	0.90306	1	1	100
Annotation Cluster 116	Enrichment Score: 0.18183693546133564
Category	Term	Count	%	PValue	Genes	List Total	Pop Hits	Pop Total	Fold Enrichment	Bonferroni	Benjamini	FDR
GOTERM_BP_DIRECT	GO:0031145~anaphase-promoting complex-dependent catabolic process	4	0.597015	0.534245	CUL3, MAD2L1, CDC20, PSME4	596	79	16792	1.42656	1	0.999876	99.9999
GOTERM_BP_DIRECT	GO:0043161~proteasome-mediated ubiquitin-dependent protein catabolic process	8	1.19403	0.582791	CUL3, CRBN, MAD2L1, ARRB1, CDC20, PSME4, TNFAIP1, BTBD9	596	203	16792	1.11032	1	0.99994	100
GOTERM_BP_DIRECT	GO:0051437~positive regulation of ubiquitin-protein ligase activity involved in regulation of mitotic cell cycle transition	3	0.447761	0.756294	MAD2L1, CDC20, PSME4	596	76	16792	1.11215	1	0.999998	100
GOTERM_BP_DIRECT	GO:0042787~protein ubiquitination involved in ubiquitin-dependent protein catabolic process	5	0.746269	0.795625	CUL3, ARIH2, MAD2L1, CDC20, BTBD9	596	153	16792	0.920735	1	0.999999	100
Annotation Cluster 117	Enrichment Score: 0.1741627588422543
Category	Term	Count	%	PValue	Genes	List Total	Pop Hits	Pop Total	Fold Enrichment	Bonferroni	Benjamini	FDR
UP_SEQ_FEATURE	repeat:Kelch 5	3	0.447761	0.638671	KLHL29, KBTBD3, KLHDC4	655	66	20063	1.3923	1	0.999999	100
UP_SEQ_FEATURE	repeat:Kelch 4	3	0.447761	0.670388	KLHL29, KBTBD3, KLHDC4	655	70	20063	1.31274	1	1	100
UP_KEYWORDS	Kelch repeat	3	0.447761	0.675792	KLHL29, KBTBD3, KLHDC4	660	72	20581	1.29931	1	0.937331	100
UP_SEQ_FEATURE	repeat:Kelch 3	3	0.447761	0.677957	KLHL29, KBTBD3, KLHDC4	655	71	20063	1.29425	1	1	100
UP_SEQ_FEATURE	repeat:Kelch 1	3	0.447761	0.677957	KLHL29, KBTBD3, KLHDC4	655	71	20063	1.29425	1	1	100
UP_SEQ_FEATURE	repeat:Kelch 2	3	0.447761	0.677957	KLHL29, KBTBD3, KLHDC4	655	71	20063	1.29425	1	1	100
Annotation Cluster 118	Enrichment Score: 0.16849319625581388
Category	Term	Count	%	PValue	Genes	List Total	Pop Hits	Pop Total	Fold Enrichment	Bonferroni	Benjamini	FDR
UP_KEYWORDS	GPI-anchor	5	0.746269	0.642989	LYPD2, TNFRSF10C, LYNX1, RTN4RL1, MMP25	660	137	20581	1.13808	1	0.925595	99.9999
UP_SEQ_FEATURE	propeptide:Removed in mature form	8	1.19403	0.657037	LYPD2, TNFRSF10C, LYNX1, RTN4RL1, MAP1LC3B, RAC3, MMP25, GNG7	655	237	20063	1.03394	1	0.999999	100
GOTERM_CC_DIRECT	GO:0031225~anchored component of membrane	4	0.597015	0.739141	LYPD2, TNFRSF10C, LYNX1, MMP25	616	113	18224	1.04724	1	0.989015	100
Annotation Cluster 119	Enrichment Score: 0.16097747285950972
Category	Term	Count	%	PValue	Genes	List Total	Pop Hits	Pop Total	Fold Enrichment	Bonferroni	Benjamini	FDR
UP_SEQ_FEATURE	domain:RRM	6	0.895522	0.450447	SETD1B, RBM20, G3BP1, SYNJ2, RBM38, EWSR1	655	135	20063	1.36136	1	0.999967	99.9966
GOTERM_MF_DIRECT	GO:0000166~nucleotide binding	13	1.9403	0.562961	ADCY3, ITPA, SETD1B, RBM20, G3BP1, SYNJ2, NPR1, RPL23A, RBM38, ESRP2, CHFR, EWSR1, TRIB2	592	348	16881	1.06522	1	0.998229	99.9997
GOTERM_MF_DIRECT	GO:0003729~mRNA binding	5	0.746269	0.641593	G3BP1, ZC3H12A, RBM38, ESRP2, FXR2	592	125	16881	1.14061	1	0.999175	100
INTERPRO	IPR000504:RNA recognition motif domain	7	1.04478	0.787013	SETD1B, RBM20, G3BP1, SYNJ2, RBM38, ESRP2, EWSR1	634	226	18559	0.906682	1	0.999999	100
UP_KEYWORDS	RNA-binding	19	2.83582	0.799762	SCAF1, CARHSP1, TRMU, ADARB2, FASTK, RBM20, SETD1B, G3BP1, SPI1, RPL23A, FXR2, ZNF346, ATXN1, ZC3H12A, SYNJ2, RBM38, ESRP2, ZNF385A, EWSR1	660	665	20581	0.890952	1	0.97471	100
INTERPRO	IPR012677:Nucleotide-binding, alpha-beta plait	8	1.19403	0.800291	SETD1B, RBM20, G3BP1, SYNJ2, RBM38, RPL23A, ESRP2, EWSR1	634	264	18559	0.887057	1	1	100
SMART	SM00360:RRM	6	0.895522	0.91114	SETD1B, RBM20, G3BP1, RBM38, ESRP2, EWSR1	384	212	10057	0.741229	1	0.999997	100
Annotation Cluster 120	Enrichment Score: 0.11151168337301053
Category	Term	Count	%	PValue	Genes	List Total	Pop Hits	Pop Total	Fold Enrichment	Bonferroni	Benjamini	FDR
INTERPRO	IPR013320:Concanavalin A-like lectin/glucanase, subgroup	9	1.34328	0.536569	FSD1, EGFLAM, LAMA5, LMAN2L, TRIM27, SPSB4, CNTNAP1, PAPPA2, COL16A1	634	232	18559	1.13559	1	0.999891	99.9996
UP_SEQ_FEATURE	domain:B30.2/SPRY	3	0.447761	0.829225	FSD1, TRIM27, SPSB4	655	97	20063	0.947336	1	1	100
INTERPRO	IPR003877:SPla/RYanodine receptor SPRY	3	0.447761	0.835246	FSD1, TRIM27, SPSB4	634	94	18559	0.934241	1	1	100
INTERPRO	IPR001870:B30.2/SPRY domain	3	0.447761	0.855922	FSD1, TRIM27, SPSB4	634	99	18559	0.887057	1	1	100
SMART	SM00449:SPRY	3	0.447761	0.870753	FSD1, TRIM27, SPSB4	384	92	10057	0.854025	1	0.99999	100
Annotation Cluster 121	Enrichment Score: 0.09626804073981686
Category	Term	Count	%	PValue	Genes	List Total	Pop Hits	Pop Total	Fold Enrichment	Bonferroni	Benjamini	FDR
UP_KEYWORDS	Metalloprotease	5	0.746269	0.721314	ADAMTS20, PAPPA2, MMP25, MMP24, CPZ	660	152	20581	1.02577	1	0.951573	100
GOTERM_MF_DIRECT	GO:0004222~metalloendopeptidase activity	4	0.597015	0.761574	ADAMTS20, PAPPA2, MMP25, MMP24	592	113	16881	1.00939	1	0.999917	100
INTERPRO	IPR024079:Metallopeptidase, catalytic domain	3	0.447761	0.768471	ADAMTS20, MMP25, MMP24	634	81	18559	1.08418	1	0.999999	100
UP_SEQ_FEATURE	metal ion-binding site:Zinc; catalytic	4	0.597015	0.796159	ADAMTS20, PAPPA2, MMP25, MMP24	655	129	20063	0.949784	1	1	100
UP_KEYWORDS	Zymogen	6	0.895522	0.819021	HTRA2, ADAMTS20, PAPPA2, PCSK6, MMP25, MMP24	660	214	20581	0.874299	1	0.978055	100
UP_KEYWORDS	Cleavage on pair of basic residues	6	0.895522	0.960799	KISS1, ADAMTS20, PCSK6, LOXL1, MMP25, MMP24	660	294	20581	0.636395	1	0.998332	100
Annotation Cluster 122	Enrichment Score: 0.08803701476059311
Category	Term	Count	%	PValue	Genes	List Total	Pop Hits	Pop Total	Fold Enrichment	Bonferroni	Benjamini	FDR
GOTERM_BP_DIRECT	GO:0007187~G-protein coupled receptor signaling pathway, coupled to cyclic nucleotide second messenger	4	0.597015	0.222473	SSTR2, MC1R, PTH1R, VIPR1	596	46	16792	2.44996	1	0.994713	98.8481
KEGG_PATHWAY	hsa04080:Neuroactive ligand-receptor interaction	8	1.19403	0.888042	P2RY6, PARD3, SSTR2, MC1R, TRPV1, PTH1R, VIPR1, CHRNG	254	277	6910	0.785696	1	0.978412	100
UP_KEYWORDS	Transducer	11	1.64179	0.99999	P2RY6, SSTR2, CCR7, MC1R, TAS2R4, CCR10, PTH1R, GNA12, VIPR1, LGR4, GNG7	660	899	20581	0.381554	1	1	100
GOTERM_BP_DIRECT	GO:0007186~G-protein coupled receptor signaling pathway	12	1.79104	0.999997	CCR7, TAS2R4, CCR10, PTH1R, GNA12, AKAP13, NPR1, VIPR1, LGR4, APLP2, GNG7, CALM1	596	899	16792	0.376078	1	1	100
UP_KEYWORDS	G-protein coupled receptor	9	1.34328	0.999997	P2RY6, SSTR2, CCR7, MC1R, TAS2R4, CCR10, PTH1R, VIPR1, LGR4	660	842	20581	0.333314	1	1	100
INTERPRO	IPR000276:G protein-coupled receptor, rhodopsin-like	6	0.895522	1	P2RY6, SSTR2, CCR7, MC1R, CCR10, LGR4	634	719	18559	0.24428	1	1	100
INTERPRO	IPR017452:GPCR, rhodopsin-like, 7TM	6	0.895522	1	P2RY6, SSTR2, CCR7, MC1R, CCR10, LGR4	634	736	18559	0.238638	1	1	100
GOTERM_MF_DIRECT	GO:0004930~G-protein coupled receptor activity	5	0.746269	1	P2RY6, CCR7, TAS2R4, CCR10, LGR4	592	710	16881	0.200811	1	1	100
Annotation Cluster 123	Enrichment Score: 0.07435928898044535
Category	Term	Count	%	PValue	Genes	List Total	Pop Hits	Pop Total	Fold Enrichment	Bonferroni	Benjamini	FDR
GOTERM_BP_DIRECT	GO:0035725~sodium ion transmembrane transport	3	0.447761	0.736247	SLC17A4, SCNN1A, SLC34A2	596	73	16792	1.15786	1	0.999997	100
UP_KEYWORDS	Sodium transport	3	0.447761	0.892554	SLC17A4, SCNN1A, SLC34A2	660	117	20581	0.799573	1	0.991265	100
UP_KEYWORDS	Sodium	3	0.447761	0.910467	SLC17A4, SCNN1A, SLC34A2	660	124	20581	0.754435	1	0.993905	100
Annotation Cluster 124	Enrichment Score: 0.0685521517154853
Category	Term	Count	%	PValue	Genes	List Total	Pop Hits	Pop Total	Fold Enrichment	Bonferroni	Benjamini	FDR
GOTERM_BP_DIRECT	GO:0006397~mRNA processing	7	1.04478	0.612396	SCAF1, TSEN54, ADARB2, RBM20, SCNM1, RBM38, ALKBH5	596	179	16792	1.1018	1	0.999963	100
GOTERM_BP_DIRECT	GO:0008380~RNA splicing	4	0.597015	0.936778	SCAF1, RBM20, SCNM1, RBM38	596	166	16792	0.678904	1	1	100
UP_KEYWORDS	mRNA processing	7	1.04478	0.956979	SCAF1, TSEN54, ADARB2, RBM20, SCNM1, RBM38, ESRP2	660	332	20581	0.65748	1	0.998119	100
UP_KEYWORDS	mRNA splicing	5	0.746269	0.968767	SCAF1, RBM20, SCNM1, RBM38, ESRP2	660	260	20581	0.599679	1	0.998781	100
Annotation Cluster 125	Enrichment Score: 0.06732849724472124
Category	Term	Count	%	PValue	Genes	List Total	Pop Hits	Pop Total	Fold Enrichment	Bonferroni	Benjamini	FDR
GOTERM_CC_DIRECT	GO:0000776~kinetochore	3	0.447761	0.763295	MAD1L1, MAD2L1, PINX1	616	81	18224	1.09572	1	0.990465	100
GOTERM_CC_DIRECT	GO:0000777~condensed chromosome kinetochore	3	0.447761	0.796945	MAD1L1, MAD2L1, PINX1	616	87	18224	1.02015	1	0.992978	100
UP_KEYWORDS	Kinetochore	3	0.447761	0.830198	MAD1L1, MAD2L1, PINX1	660	99	20581	0.944949	1	0.980097	100
UP_KEYWORDS	Centromere	3	0.447761	0.936543	MAD1L1, MAD2L1, PINX1	660	137	20581	0.682847	1	0.996464	100
UP_KEYWORDS	Chromosome	8	1.19403	0.973928	MAD1L1, NUMA1, HIST1H1T, MAD2L1, SETD1B, TELO2, ZBTB4, PINX1	660	400	20581	0.623667	1	0.99911	100
Annotation Cluster 126	Enrichment Score: 0.052137227463729716
Category	Term	Count	%	PValue	Genes	List Total	Pop Hits	Pop Total	Fold Enrichment	Bonferroni	Benjamini	FDR
UP_SEQ_FEATURE	domain:Cadherin 6	3	0.447761	0.758074	PCDH1, PCDHGA1, CDH23	655	83	20063	1.10713	1	1	100
UP_SEQ_FEATURE	domain:Cadherin 5	3	0.447761	0.860858	PCDH1, PCDHGA1, CDH23	655	105	20063	0.875158	1	1	100
UP_SEQ_FEATURE	domain:Cadherin 3	3	0.447761	0.884039	PCDH1, PCDHGA1, CDH23	655	112	20063	0.820461	1	1	100
UP_SEQ_FEATURE	domain:Cadherin 4	3	0.447761	0.884039	PCDH1, PCDHGA1, CDH23	655	112	20063	0.820461	1	1	100
UP_SEQ_FEATURE	domain:Cadherin 1	3	0.447761	0.892836	PCDH1, PCDHGA1, CDH23	655	115	20063	0.799057	1	1	100
UP_SEQ_FEATURE	domain:Cadherin 2	3	0.447761	0.892836	PCDH1, PCDHGA1, CDH23	655	115	20063	0.799057	1	1	100
INTERPRO	IPR020894:Cadherin conserved site	3	0.447761	0.901824	PCDH1, PCDHGA1, CDH23	634	113	18559	0.777156	1	1	100
INTERPRO	IPR002126:Cadherin	3	0.447761	0.914614	PCDH1, PCDHGA1, CDH23	634	118	18559	0.744226	1	1	100
INTERPRO	IPR015919:Cadherin-like	3	0.447761	0.919278	PCDH1, PCDHGA1, CDH23	634	120	18559	0.731822	1	1	100
GOTERM_BP_DIRECT	GO:0007156~homophilic cell adhesion via plasma membrane adhesion molecules	4	0.597015	0.922199	PCDH1, CEACAM1, PCDHGA1, CDH23	596	158	16792	0.713278	1	1	100
SMART	SM00112:CA	3	0.447761	0.939138	PCDH1, PCDHGA1, CDH23	384	116	10057	0.67733	1	0.999999	100
Annotation Cluster 127	Enrichment Score: 0.04835758277128629
Category	Term	Count	%	PValue	Genes	List Total	Pop Hits	Pop Total	Fold Enrichment	Bonferroni	Benjamini	FDR
INTERPRO	IPR015943:WD40/YVTN repeat-like-containing domain	10	1.49254	0.799785	WSB1, CORO1B, PLXNC1, TULP4, SEMA3B, CDC20, PPP2R2B, TSSC1, ARHGEF10L, RPTOR	634	331	18559	0.884377	1	1	100
INTERPRO	IPR019775:WD40 repeat, conserved site	5	0.746269	0.822052	WSB1, CORO1B, CDC20, PPP2R2B, TSSC1	634	166	18559	0.881713	1	1	100
UP_SEQ_FEATURE	repeat:WD 3	7	1.04478	0.875372	WSB1, CORO1B, TULP4, CDC20, PPP2R2B, TSSC1, RPTOR	655	269	20063	0.797077	1	1	100
UP_SEQ_FEATURE	repeat:WD 5	6	0.895522	0.888975	WSB1, CORO1B, CDC20, PPP2R2B, TSSC1, RPTOR	655	237	20063	0.775457	1	1	100
UP_KEYWORDS	WD repeat	7	1.04478	0.889725	WSB1, CORO1B, TULP4, CDC20, PPP2R2B, TSSC1, RPTOR	660	281	20581	0.776809	1	0.991002	100
UP_SEQ_FEATURE	repeat:WD 1	7	1.04478	0.89361	WSB1, CORO1B, TULP4, CDC20, PPP2R2B, TSSC1, RPTOR	655	278	20063	0.771272	1	1	100
UP_SEQ_FEATURE	repeat:WD 2	7	1.04478	0.89361	WSB1, CORO1B, TULP4, CDC20, PPP2R2B, TSSC1, RPTOR	655	278	20063	0.771272	1	1	100
INTERPRO	IPR001680:WD40 repeat	7	1.04478	0.898335	WSB1, CORO1B, TULP4, CDC20, PPP2R2B, TSSC1, RPTOR	634	268	18559	0.76459	1	1	100
INTERPRO	IPR017986:WD40-repeat-containing domain	8	1.19403	0.901004	WSB1, CORO1B, TULP4, CDC20, PPP2R2B, TSSC1, ARHGEF10L, RPTOR	634	306	18559	0.765304	1	1	100
UP_SEQ_FEATURE	repeat:WD 4	6	0.895522	0.921666	WSB1, CORO1B, CDC20, PPP2R2B, TSSC1, RPTOR	655	255	20063	0.720718	1	1	100
SMART	SM00320:WD40	7	1.04478	0.944754	WSB1, CORO1B, TULP4, CDC20, PPP2R2B, TSSC1, RPTOR	384	267	10057	0.686632	1	0.999999	100
UP_SEQ_FEATURE	repeat:WD 6	4	0.597015	0.956462	WSB1, CDC20, PPP2R2B, RPTOR	655	196	20063	0.625113	1	1	100
UP_SEQ_FEATURE	repeat:WD 7	3	0.447761	0.959664	CDC20, PPP2R2B, RPTOR	655	151	20063	0.608554	1	1	100
Annotation Cluster 128	Enrichment Score: 0.024753978004900964
Category	Term	Count	%	PValue	Genes	List Total	Pop Hits	Pop Total	Fold Enrichment	Bonferroni	Benjamini	FDR
UP_SEQ_FEATURE	repeat:1	6	0.895522	0.924715	CD68, SPRR1B, RBP3, CLN8, EWSR1, NFATC1	655	257	20063	0.71511	1	1	100
UP_SEQ_FEATURE	repeat:2	6	0.895522	0.92909	CD68, SPRR1B, RBP3, CLN8, EWSR1, NFATC1	655	260	20063	0.706858	1	1	100
UP_SEQ_FEATURE	repeat:3	5	0.746269	0.93814	SPRR1B, RBP3, CLN8, EWSR1, NFATC1	655	225	20063	0.680679	1	1	100
UP_SEQ_FEATURE	repeat:4	4	0.597015	0.951966	SPRR1B, RBP3, CLN8, EWSR1	655	192	20063	0.638136	1	1	100
UP_SEQ_FEATURE	repeat:6	3	0.447761	0.95493	SPRR1B, CLN8, EWSR1	655	147	20063	0.625113	1	1	100
UP_SEQ_FEATURE	repeat:5	3	0.447761	0.969504	SPRR1B, CLN8, EWSR1	655	161	20063	0.570755	1	1	100
Annotation Cluster 129	Enrichment Score: 0.0055017502326335285
Category	Term	Count	%	PValue	Genes	List Total	Pop Hits	Pop Total	Fold Enrichment	Bonferroni	Benjamini	FDR
UP_SEQ_FEATURE	zinc finger region:C2H2-type 15	3	0.447761	0.93383	ZNF611, RREB1, ZNF175	655	133	20063	0.690914	1	1	100
UP_SEQ_FEATURE	zinc finger region:C2H2-type 13	4	0.597015	0.964296	ZNF611, RREB1, ZNF792, ZNF175	655	204	20063	0.600599	1	1	100
UP_SEQ_FEATURE	zinc finger region:C2H2-type 14	3	0.447761	0.964914	ZNF611, RREB1, ZNF175	655	156	20063	0.589049	1	1	100
UP_SEQ_FEATURE	zinc finger region:C2H2-type 12	5	0.746269	0.969242	ZNF611, RREB1, ZNF792, ZNF175, ZNF436	655	256	20063	0.598253	1	1	100
UP_SEQ_FEATURE	zinc finger region:C2H2-type 6	10	1.49254	0.984024	ZNF611, ZSCAN22, RREB1, CASZ1, ZBTB4, BCL6, ZNF792, ZNF175, ZNF436, ZNF165	655	501	20063	0.611388	1	1	100
UP_SEQ_FEATURE	zinc finger region:C2H2-type 5	11	1.64179	0.98624	ZNF611, ZNF282, ZSCAN22, RREB1, CASZ1, ZBTB4, BCL6, ZNF792, ZNF175, ZNF436, ZNF165	655	550	20063	0.612611	1	1	100
UP_SEQ_FEATURE	zinc finger region:C2H2-type 3	13	1.9403	0.987459	ZNF611, ZNF282, RREB1, ZNF792, ZNF175, ZNF165, ZSCAN22, ZBTB4, CASZ1, BCL6, ZFPM1, ZNF446, ZNF436	655	636	20063	0.626096	1	1	100
UP_SEQ_FEATURE	domain:KRAB	6	0.895522	0.988205	ZNF611, ZNF282, ZNF792, ZNF446, ZNF175, ZNF436	655	343	20063	0.535811	1	1	100
INTERPRO	IPR015880:Zinc finger, C2H2-like	17	2.53731	0.988347	ZNF611, ZNF282, RREB1, ZNF792, ZNF346, ATMIN, ZNF175, ZNF165, ZSCAN22, ZBTB4, CASZ1, ZNF598, BCL6, ZFPM1, ZNF446, ZNF385A, ZNF436	634	762	18559	0.653069	1	1	100
UP_SEQ_FEATURE	zinc finger region:C2H2-type 11	5	0.746269	0.989498	ZNF611, RREB1, ZNF792, ZNF175, ZNF436	655	301	20063	0.508813	1	1	100
UP_SEQ_FEATURE	zinc finger region:C2H2-type 4	11	1.64179	0.993303	ZNF282, ZSCAN22, RREB1, CASZ1, ZBTB4, BCL6, ZNF792, ZFPM1, ZNF175, ZNF436, ZNF165	655	588	20063	0.57302	1	1	100
INTERPRO	IPR007087:Zinc finger, C2H2	17	2.53731	0.993842	ZNF611, ZNF282, RREB1, ZNF792, ZNF346, ATMIN, ZNF175, ZNF165, ZSCAN22, ZBTB4, CASZ1, ZNF598, BCL6, ZFPM1, ZNF446, ZNF385A, ZNF436	634	799	18559	0.622827	1	1	100
UP_SEQ_FEATURE	zinc finger region:C2H2-type 1	10	1.49254	0.994341	ZNF282, ZSCAN22, RREB1, CASZ1, BCL6, ZNF792, ZFPM1, ZNF446, ATMIN, ZNF436	655	554	20063	0.552898	1	1	100
UP_SEQ_FEATURE	zinc finger region:C2H2-type 8	7	1.04478	0.995056	ZNF611, ZSCAN22, RREB1, CASZ1, ZNF792, ZNF175, ZNF436	655	427	20063	0.50214	1	1	100
UP_SEQ_FEATURE	zinc finger region:C2H2-type 2	11	1.64179	0.996068	ZNF611, ZNF282, ZSCAN22, RREB1, CASZ1, ZBTB4, BCL6, ZFPM1, ZNF446, ZNF436, ZNF165	655	615	20063	0.547863	1	1	100
GOTERM_MF_DIRECT	GO:0003676~nucleic acid binding	22	3.28358	0.996074	ZNF611, RECQL5, ZNF282, POLR3K, RREB1, SETD1B, G3BP1, TRIM27, ZNF792, ZNF346, ZNF175, ZNF165, ZBTB4, SYNJ2, BCL6, RBM38, ESRP2, ZNF446, ZNF385A, RTEL1, PINX1, ZNF436	592	985	16881	0.636888	1	1	100
UP_SEQ_FEATURE	zinc finger region:C2H2-type 10	5	0.746269	0.996149	ZNF611, RREB1, ZNF792, ZNF175, ZNF436	655	341	20063	0.449128	1	1	100
UP_SEQ_FEATURE	zinc finger region:C2H2-type 7	7	1.04478	0.99786	ZNF611, ZSCAN22, RREB1, CASZ1, ZNF792, ZNF175, ZNF436	655	463	20063	0.463097	1	1	100
SMART	SM00355:ZnF_C2H2	17	2.53731	0.997914	ZNF611, ZNF282, RREB1, ZNF792, ZNF346, ATMIN, ZNF175, ZNF165, ZSCAN22, ZBTB4, CASZ1, ZNF598, BCL6, ZFPM1, ZNF446, ZNF385A, ZNF436	384	762	10057	0.584294	1	1	100
INTERPRO	IPR001909:Krueppel-associated box	6	0.895522	0.998182	ZNF611, ZNF282, ZNF792, ZNF446, ZNF175, ZNF436	634	402	18559	0.436909	1	1	100
INTERPRO	IPR013087:Zinc finger C2H2-type/integrase DNA-binding domain	12	1.79104	0.999345	ZNF611, ZNF282, ZSCAN22, RREB1, ZBTB4, BCL6, ZNF792, ZFPM1, ZNF446, ZNF175, ZNF436, ZNF165	634	712	18559	0.493363	1	1	100
SMART	SM00349:KRAB	6	0.895522	0.999351	ZNF611, ZNF282, ZNF792, ZNF446, ZNF175, ZNF436	384	392	10057	0.400869	1	1	100
UP_SEQ_FEATURE	zinc finger region:C2H2-type 9	4	0.597015	0.999743	RREB1, ZNF792, ZNF175, ZNF436	655	385	20063	0.318239	1	1	100
